# Supplementary material
Source: PubMed Central journal article supplement (PMC4678357)
Supplement: aasm.39.1.97s1.pdf [file aasm.39.1.97s1.pdf]

## Supplementary Table I: The influence of personal and situational variables on PSQI

Each of the listed variables represents a separate univariate logistic regression model for the dichotomized PSQI explained by that variable and adjusted for WTN levels and province. The OR (CI) and p-value columns for each of the three predictors in the logistic regression models represent the odds ratio (confidence interval) and statistical significance of the corresponding predictor while adjusting for the other two. It should be emphasized that variables considered in the univariate analysis have been previously demonstrated to be related to the modeled endpoint and/or considered by the authors to conceptually have a potential association with the modeled endpoint. The PSQI score was dichotomized with the objective to model the proportion of individuals with poor sleep quality (i.e., PSQI > 5). As the analysis of each listed variable only adjusts for WTN category and province, interpretation of any individual relationship must be made with caution.

| Variable                             | Group                      | n(%) <sup>b</sup> | PSQI <sup>a</sup><br>OR (CI) <sup>c</sup> | p-value <sup>d</sup> | Sound Bin<br>p-value <sup>e</sup> | Province<br>p-value <sup>f</sup> | Nagelkerke<br>pseudo R <sup>2g</sup> | H-L test <sup>h</sup> |
|--------------------------------------|----------------------------|-------------------|-------------------------------------------|----------------------|-----------------------------------|----------------------------------|--------------------------------------|-----------------------|
| WTN levels                           | <25dBA                     | 40 (49.4)         |                                           |                      | 0.4740                            | 0.6997                           | 0.00                                 | 0.5246                |
|                                      | [25-30)dBA                 | 45 (48.9)         |                                           |                      |                                   |                                  |                                      |                       |
|                                      | [30-35)dBA                 | 138 (46.5)        |                                           |                      |                                   |                                  |                                      |                       |
|                                      | [35-40)dBA                 | 227 (44.4)        |                                           |                      |                                   |                                  |                                      |                       |
|                                      | [40-46]dBA                 | 106 (46.7)        |                                           |                      |                                   |                                  |                                      |                       |
| Background nighttime<br>sound (BNTS) | <40 dBA                    | 114 (45.8)        | 0.92 (0.52, 1.62)                         | 0.9727               | 0.5674                            | 0.6980                           | 0.00                                 | 0.3729                |
|                                      | [40, 50) dBA               | 195 (45.1)        | 0.91 (0.55, 1.51)                         |                      |                                   |                                  |                                      |                       |
|                                      | [50, 55) dBA               | 213 (46.7)        | 0.96 (0.58, 1.58)                         |                      |                                   |                                  |                                      |                       |
|                                      | ≥55 dBA                    | 34 (47.9)         | reference group                           |                      |                                   |                                  |                                      |                       |
| Sex                                  | Male                       | 254 (43.0)        | reference group                           | 0.0407               | 0.5053                            | 0.7799                           | 0.01                                 | 0.6513                |
|                                      | Female                     | 302 (48.9)        | 1.27 (1.01, 1.59)                         |                      |                                   |                                  |                                      |                       |
| Age group                            | ≤24                        | 25 (34.7)         | 0.70 (0.41, 1.20)                         | 0.0143               | 0.5256                            | 0.6579                           | 0.01                                 | 0.5883                |
|                                      | 25-44                      | 140 (42.9)        | 0.98 (0.71, 1.36)                         |                      |                                   |                                  |                                      |                       |
|                                      | 45-64                      | 270 (50.8)        | 1.35 (1.01, 1.81)                         |                      |                                   |                                  |                                      |                       |
|                                      | 65+                        | 121 (43.4)        | reference group                           |                      |                                   |                                  |                                      |                       |
| Marital Status                       | Married/Common-law         | 381 (45.7)        | 1.03 (0.74, 1.44)                         | 0.8412               | 0.5408                            | 0.6631                           | 0.00                                 | 0.7517                |
|                                      | Widowed/Separated/Divorced | 97 (47.8)         | 1.12 (0.74, 1.69)                         |                      |                                   |                                  |                                      |                       |
|                                      | Single, never been married | 76 (45.0)         | reference group                           |                      |                                   |                                  |                                      |                       |
| Employment                           | Yes                        | 290 (41.0)        | reference group                           | <0.0001              | 0.7115                            | 0.7329                           | 0.02                                 | 0.7295                |
|                                      | No                         | 266 (53.3)        | 1.64 (1.30, 2.07)                         |                      |                                   |                                  |                                      |                       |

| Variable                                     | Group                                              | n(%) <sup>b</sup> | PSQI <sup>a</sup><br>OR (CI) <sup>c</sup> | p-value <sup>d</sup> | Sound Bin<br>p-value <sup>e</sup> | Province<br>p-value <sup>f</sup> | Nagelkerke<br>pseudo R <sup>2g</sup> | H-L test <sup>h</sup> |
|----------------------------------------------|----------------------------------------------------|-------------------|-------------------------------------------|----------------------|-----------------------------------|----------------------------------|--------------------------------------|-----------------------|
| Employment Schedule                          | regular daytime/evening shift                      | 201 (39.1)        | 0.57 (0.44, 0.73)                         | 0.0001               | 0.6816                            | 0.6919                           | 0.03                                 | 0.5110                |
|                                              | regular night/rotating shift or irregular schedule | 78 (48.1)         | 0.82 (0.57, 1.17)                         |                      |                                   |                                  |                                      |                       |
|                                              | Split shift/on call or casual/other                | 11 (34.4)         | 0.46 (0.22, 0.97)                         |                      |                                   |                                  |                                      |                       |
|                                              | Unemployed <sup>i</sup>                            | 266 (53.3)        | reference group                           |                      |                                   |                                  |                                      |                       |
| Level of Education                           | ≤High School                                       | 302 (45.9)        | 1.11 (0.71, 1.73)                         | 0.8416               | 0.4870                            | 0.7311                           | 0.00                                 | 0.7532                |
|                                              | Trade/Certificate/College                          | 214 (46.6)        | 1.15 (0.73, 1.81)                         |                      |                                   |                                  |                                      |                       |
|                                              | University                                         | 39 (43.3)         | reference group                           |                      |                                   |                                  |                                      |                       |
| Income                                       | <60K                                               | 254 (49.5)        | reference group                           | 0.0744               | 0.2988                            | 0.1941                           | 0.01                                 | 0.1282                |
|                                              | 60-100K                                            | 131 (44.3)        | 0.81 (0.61, 1.08)                         |                      |                                   |                                  |                                      |                       |
|                                              | ≥100K                                              | 88 (40.4)         | 0.70 (0.51, 0.97)                         |                      |                                   |                                  |                                      |                       |
| Alcohol use                                  | Do not drink alcohol                               | 129 (48.3)        | 1.11 (0.75, 1.66)                         | 0.6052               | 0.4971                            | 0.8517                           | 0.00                                 | 0.4592                |
|                                              | ≤3 times/month                                     | 217 (46.9)        | 1.05 (0.73, 1.52)                         |                      |                                   |                                  |                                      |                       |
|                                              | 1-3 times/week                                     | 136 (42.9)        | 0.90 (0.61, 1.32)                         |                      |                                   |                                  |                                      |                       |
|                                              | ≥4 times/week                                      | 73 (45.6)         | reference group                           |                      |                                   |                                  |                                      |                       |
| Smoking status                               | Current                                            | 135 (49.1)        | 1.27 (0.95, 1.70)                         | 0.2148               | 0.4952                            | 0.7391                           | 0.00                                 | 0.7219                |
|                                              | former                                             | 197 (47.6)        | 1.19 (0.92, 1.55)                         |                      |                                   |                                  |                                      |                       |
|                                              | never                                              | 224 (43.2)        | reference group                           |                      |                                   |                                  |                                      |                       |
| BMI group                                    | <25 underweight-normal                             | 168 (45.2)        | 0.94 (0.70, 1.25)                         | 0.8885               | 0.3874                            | 0.7732                           | 0.00                                 | 0.8195                |
|                                              | [25-30) overweig                                   | 186 (45.4)        | 0.95 (0.71, 1.25)                         |                      |                                   |                                  |                                      |                       |
|                                              | ≥30 obese                                          | 178 (46.7)        | reference group                           |                      |                                   |                                  |                                      |                       |
| Caffeine consumption                         | None                                               | 76 (47.5)         | 0.78 (0.49, 1.25)                         | 0.0567               | 0.5159                            | 0.8756                           | 0.01                                 | 0.7082                |
|                                              | 1 or 2 cups/day                                    | 257 (42.3)        | 0.64 (0.43, 0.94)                         |                      |                                   |                                  |                                      |                       |
|                                              | 3 or 4 cups/day                                    | 156 (49.4)        | 0.84 (0.56, 1.28)                         |                      |                                   |                                  |                                      |                       |
|                                              | 5 or more cups/day                                 | 67 (53.6)         | reference group                           |                      |                                   |                                  |                                      |                       |
| Currently pregnant                           | Yes                                                | 7 (63.6)          | 2.04 (0.59, 7.03)                         | 0.2589               | 0.4883                            | 0.7508                           | 0.00                                 | 0.4792                |
|                                              | No                                                 | 548 (45.8)        | reference group                           |                      |                                   |                                  |                                      |                       |
| Self reported sleep disturbance <sup>m</sup> | High                                               | 142 (87.7)        | 10.86 (6.69, 17.64)                       | <0.0001              | 0.5503                            | 0.4634                           | 0.15                                 | 0.8034                |
|                                              | Low                                                | 413 (39.6)        | reference group                           |                      |                                   |                                  |                                      |                       |
| Type of dwelling                             | Single detached homes                              | 502 (45.3)        | reference group                           | 0.1033               | 0.7009                            | 0.8561                           | 0.00                                 | 0.4634                |

| Variable                                              | Group                        | n(%) <sup>b</sup> | PSQI <sup>a</sup><br>OR (CI) <sup>c</sup> | p-value <sup>d</sup> | Sound Bin<br>p-value <sup>e</sup> | Province<br>p-value <sup>f</sup> | Nagelkerke<br>pseudo R <sup>2g</sup> | H-L test <sup>h</sup> |
|-------------------------------------------------------|------------------------------|-------------------|-------------------------------------------|----------------------|-----------------------------------|----------------------------------|--------------------------------------|-----------------------|
| Property ownership                                    | semi/duplex/apartment        | 54 (54.5)         | 1.42 (0.93, 2.17)                         |                      |                                   |                                  |                                      |                       |
|                                                       | Own                          | 474 (45.0)        | reference group                           | 0.0692               | 0.6363                            | 0.8238                           | 0.00                                 | 0.5757                |
|                                                       | rent                         | 82 (53.2)         | 1.38 (0.98, 1.94)                         |                      |                                   |                                  |                                      |                       |
| Façade type                                           | Fully Bricked                | 156 (46.4)        | 1.10 (0.84, 1.46)                         | 0.4467               | 0.6169                            | 0.4930                           | 0.00                                 | 0.7387                |
|                                                       | Partially Bricked            | 105 (49.5)        | 1.22 (0.89, 1.69)                         |                      |                                   |                                  |                                      |                       |
|                                                       | No Brick/Other               | 295 (44.7)        | reference group                           |                      |                                   |                                  |                                      |                       |
| Bedroom volume (1000ft <sup>3</sup> )                 | b(SE) <sup>j</sup>           | 0.063 (0.067)     | 1.07 (0.94, 1.21)                         | 0.3424               | 0.4079                            | 0.6923                           | 0.00                                 | 0.8503                |
| Bedroom location                                      | Basement                     | 21 (53.8)         | 1.46 (0.75, 2.83)                         | 0.5147               | 0.4742                            | 0.6575                           | 0.00                                 | 0.6326                |
|                                                       | First floor                  | 380 (46.3)        | 1.08 (0.84, 1.40)                         |                      |                                   |                                  |                                      |                       |
|                                                       | Second floor or higher       | 155 (44.5)        | reference group                           |                      |                                   |                                  |                                      |                       |
| Closing bedroom window<br>to block outside noise      | Yes                          | 238 (62.3)        | 2.66 (2.07, 3.42)                         | <0.0001              | 0.3868                            | 0.4177                           | 0.07                                 | 0.8938                |
|                                                       | No                           | 316 (38.5)        | reference group                           |                      |                                   |                                  |                                      |                       |
| <b>Source identified as cause for closing window:</b> |                              |                   |                                           |                      |                                   |                                  |                                      |                       |
| Road traffic                                          | Yes                          | 117 (67.2)        | 2.79 (1.98, 3.92)                         | <0.0001              | 0.5597                            | 0.5411                           | 0.04                                 | 0.8599                |
|                                                       | No                           | 436 (42.4)        | reference group                           |                      |                                   |                                  |                                      |                       |
| Aircraft                                              | Yes                          | 2 (66.7)          | 2.34 (0.21, 25.88)                        | 0.4883               | 0.4073                            | 0.7039                           | 0.00                                 | 0.4796                |
|                                                       | No                           | 551 (46.0)        | reference group                           |                      |                                   |                                  |                                      |                       |
| Rail                                                  | Yes                          | 16 (66.7)         | 2.36 (1.00, 5.59)                         | 0.0504               | 0.5237                            | 0.6008                           | 0.01                                 | 0.5345                |
|                                                       | No                           | 537 (45.6)        | reference group                           |                      |                                   |                                  |                                      |                       |
| Wind turbines                                         | Yes                          | 93 (69.4)         | 3.32 (2.23, 4.95)                         | <0.0001              | 0.0254 <sup>k</sup>               | 0.5529                           | 0.04                                 | 0.2722                |
|                                                       | No                           | 460 (43.1)        | reference group                           |                      |                                   |                                  |                                      |                       |
| Other                                                 | Yes                          | 95 (58.6)         | 1.79 (1.28, 2.50)                         | 0.0008               | 0.6334                            | 0.7214                           | 0.01                                 | 0.3568                |
|                                                       | No                           | 458 (44.0)        | reference group                           |                      |                                   |                                  |                                      |                       |
| Sleep improved by closing<br>window                   | Yes                          | 182 (57.4)        | 2.17 (1.67, 2.83)                         | <0.0001              | 0.3745                            | 0.4199                           | 0.09                                 | 0.7981                |
|                                                       | No                           | 53 (85.5)         | 9.48 (4.61, 19.48)                        |                      |                                   |                                  |                                      |                       |
|                                                       | Did not need to close window | 316 (38.5)        | reference group                           |                      |                                   |                                  |                                      |                       |
| Bedroom window type                                   | Single pane                  | 50 (51.5)         | 1.20 (0.53, 2.73)                         | 0.5433               | 0.3995                            | 0.8367                           | 0.00                                 | 0.8172                |
|                                                       | Double pane                  | 490 (45.6)        | 0.95 (0.46, 1.96)                         |                      |                                   |                                  |                                      |                       |
|                                                       | Triple pane                  | 14 (46.7)         | reference group                           |                      |                                   |                                  |                                      |                       |
| Bedroom on quiet side                                 | Yes                          | 305 (44.5)        | 0.74 (0.47, 1.17)                         | 0.3093               | 0.4212                            | 0.6975                           | 0.00                                 | 0.8611                |
|                                                       | No                           | 207 (47.6)        | 0.85 (0.53, 1.36)                         |                      |                                   |                                  |                                      |                       |
|                                                       | There is no quiet side       | 43 (51.8)         | reference group                           |                      |                                   |                                  |                                      |                       |

| Variable                           | Group                        | n(%) <sup>b</sup>        | PSQI <sup>a</sup><br>OR (CI) <sup>c</sup> | p-value <sup>d</sup> | Sound Bin<br>p-value <sup>e</sup> | Province<br>p-value <sup>f</sup> | Nagelkerke<br>pseudo R <sup>2g</sup> | H-L test <sup>h</sup> |
|------------------------------------|------------------------------|--------------------------|-------------------------------------------|----------------------|-----------------------------------|----------------------------------|--------------------------------------|-----------------------|
| Air conditioner in dwelling        | Yes                          | 433 (45.7)               | 0.93 (0.66, 1.31)                         | 0.6690               | 0.4215                            | 0.9699                           | 0.00                                 | 0.2186                |
|                                    | No                           | 123 (47.5)               | reference group                           |                      |                                   |                                  |                                      |                       |
| Air conditioning unit in bedroom   | Yes                          | 39 (49.4)                | 1.06 (0.63, 1.80)                         | 0.8837               | 0.4324                            | 0.9490                           | 0.00                                 | 0.8562                |
|                                    | No                           | 58 (46.0)                | 0.93 (0.58, 1.48)                         |                      |                                   |                                  |                                      |                       |
|                                    | central AC or other<br>NO AC | 336 (45.2)<br>123 (47.5) | 0.90 (0.63, 1.29)<br>reference group      |                      |                                   |                                  |                                      |                       |
| Number of years hearing the WT     | Do not hear wind turbines    | 274 (43.1)               | reference group                           | 0.0128               | 0.0319 <sup>L</sup>               | 0.9495                           | 0.01                                 | 0.6699                |
|                                    | less than 1 year             | 27 (45.8)                | 1.23 (0.71, 2.12)                         |                      |                                   |                                  |                                      |                       |
|                                    | 1 year or more               | 253 (49.6)               | 1.51 (1.15, 1.99)                         |                      |                                   |                                  |                                      |                       |
| Complaint about WT                 | Yes                          | 19 (57.6)                | 1.64 (0.81, 3.31)                         | 0.1690               | 0.3750                            | 0.9362                           | 0.00                                 | 0.7016                |
|                                    | No                           | 533 (45.5)               | reference group                           |                      |                                   |                                  |                                      |                       |
| Concerned about physical safety    | High                         | 53 (71.6)                | 3.33 (1.98, 5.62)                         | <0.0001              | 0.1491                            | 0.5999                           | 0.03                                 | 0.6800                |
|                                    | Low                          | 498 (44.3)               | reference group                           |                      |                                   |                                  |                                      |                       |
| Personal benefits                  | Yes                          | 33 (30.3)                | reference group                           | 0.0009               | 0.9473                            | 0.6907                           | 0.01                                 | 0.9463                |
|                                    | No                           | 499 (47.5)               | 2.08 (1.35, 3.21)                         |                      |                                   |                                  |                                      |                       |
| Audible wind turbines              | Yes                          | 282 (49.2)               | 1.47 (1.13, 1.91)                         | 0.0045               | 0.0397 <sup>L</sup>               | 0.7929                           | 0.01                                 | 0.8266                |
|                                    | No                           | 274 (43.1)               | reference group                           |                      |                                   |                                  |                                      |                       |
| Audible road traffic               | Yes                          | 473 (47.7)               | 1.48 (1.09, 2.00)                         | 0.0115               | 0.3391                            | 0.8150                           | 0.01                                 | 0.6011                |
|                                    | No                           | 83 (38.4)                | reference group                           |                      |                                   |                                  |                                      |                       |
| Audible aircraft                   | Yes                          | 286 (48.0)               | 1.17 (0.93, 1.47)                         | 0.1713               | 0.4337                            | 0.7544                           | 0.00                                 | 0.3732                |
|                                    | No                           | 270 (44.1)               | reference group                           |                      |                                   |                                  |                                      |                       |
| Audible rail                       | Yes                          | 93 (41.3)                | 0.76 (0.56, 1.04)                         | 0.0833               | 0.2725                            | 0.9936                           | 0.00                                 | 0.5581                |
|                                    | No                           | 463 (47.1)               | reference group                           |                      |                                   |                                  |                                      |                       |
| ONT: audible rail                  | Yes                          | 93 (41.3)                | 0.74 (0.54, 1.01)                         | 0.0577               | 0.0985                            |                                  | 0.01                                 | 0.9847                |
|                                    | No                           | 363 (47.1)               | reference group                           |                      |                                   |                                  |                                      |                       |
| Annoyed by snoring                 | High                         | 45 (76.3)                | 4.04 (2.19, 7.45)                         | <0.0001              | 0.4066                            | 0.6481                           | 0.03                                 | 0.7168                |
|                                    | Low                          | 511 (44.5)               | reference group                           |                      |                                   |                                  |                                      |                       |
| <b>Source of sleep disturbance</b> |                              |                          |                                           |                      |                                   |                                  |                                      |                       |
| Wind turbines                      | Yes                          | 60 (75.0)                | 4.37 (2.57, 7.41)                         | <0.0001              | 0.0331 <sup>L</sup>               | 0.5850                           | 0.04                                 | 0.4840                |
|                                    | No                           | 474 (43.2)               | reference group                           |                      |                                   |                                  |                                      |                       |

| Variable                             | Group | n(%) <sup>b</sup> | PSQI <sup>a</sup><br>OR (CI) <sup>c</sup> | p-value <sup>d</sup> | Sound Bin<br>p-value <sup>e</sup> | Province<br>p-value <sup>f</sup> | Nagelkerke<br>pseudo R <sup>2g</sup> | H-L test <sup>h</sup> |
|--------------------------------------|-------|-------------------|-------------------------------------------|----------------------|-----------------------------------|----------------------------------|--------------------------------------|-----------------------|
| Children                             | Yes   | 44 (44.9)         | 0.97 (0.64, 1.48)                         | 0.9008               | 0.2636                            | 0.9430                           | 0.00                                 | 0.5039                |
|                                      | No    | 490 (45.4)        | reference group                           |                      |                                   |                                  |                                      |                       |
| Pets                                 | Yes   | 43 (46.2)         | 1.05 (0.69, 1.61)                         | 0.8279               | 0.2627                            | 0.9321                           | 0.00                                 | 0.3422                |
|                                      | No    | 491 (45.3)        | reference group                           |                      |                                   |                                  |                                      |                       |
| Neighbours                           | Yes   | 24 (64.9)         | 2.25 (1.13, 4.48)                         | 0.0206               | 0.3298                            | 0.8168                           | 0.01                                 | 0.4786                |
|                                      | No    | 510 (44.7)        | reference group                           |                      |                                   |                                  |                                      |                       |
| Stress/anxiety                       | Yes   | 51 (69.9)         | 2.98 (1.79, 4.99)                         | <0.0001              | 0.2696                            | 0.9639                           | 0.02                                 | 0.4166                |
|                                      | No    | 483 (43.7)        | reference group                           |                      |                                   |                                  |                                      |                       |
| Health related/physical<br>pain      | Yes   | 96 (71.6)         | 3.47 (2.34, 5.15)                         | <0.0001              | 0.4629                            | 0.8831                           | 0.05                                 | 0.5543                |
|                                      | No    | 438 (42.0)        | reference group                           |                      |                                   |                                  |                                      |                       |
| Snoring                              | Yes   | 31 (51.7)         | 1.30 (0.77, 2.18)                         | 0.3258               | 0.2754                            | 0.9501                           | 0.00                                 | 0.3553                |
|                                      | No    | 503 (45.0)        | reference group                           |                      |                                   |                                  |                                      |                       |
| Other                                | Yes   | 336 (61.0)        | 3.39 (2.67, 4.32)                         | <0.0001              | 0.4921                            | 0.4732                           | 0.11                                 | 0.2804                |
|                                      | No    | 198 (31.6)        | reference group                           |                      |                                   |                                  |                                      |                       |
| Sensitivity to noise                 | High  | 113 (66.1)        | 2.63 (1.87, 3.70)                         | <0.0001              | 0.4647                            | 0.5733                           | 0.04                                 | 0.6084                |
|                                      | Low   | 441 (42.7)        | reference group                           |                      |                                   |                                  |                                      |                       |
| Annoyance to WTN                     | High  | 58 (67.4)         | 2.80 (1.74, 4.51)                         | <0.0001              | 0.1252                            | 0.4978                           | 0.02                                 | 0.4882                |
|                                      | Low   | 497 (44.3)        | reference group                           |                      |                                   |                                  |                                      |                       |
| Annoyance with blinking<br>lights    | High  | 81 (68.1)         | 2.90 (1.93, 4.37)                         | <0.0001              | 0.1596                            | 0.3680                           | 0.03                                 | 0.6417                |
|                                      | Low   | 473 (43.6)        | reference group                           |                      |                                   |                                  |                                      |                       |
| Shadow flicker annoyance             | High  | 63 (66.3)         | 2.65 (1.69, 4.16)                         | <0.0001              | 0.1159                            | 0.6113                           | 0.02                                 | 0.4803                |
|                                      | Low   | 490 (44.2)        | reference group                           |                      |                                   |                                  |                                      |                       |
| Notice vibrations                    | Yes   | 34 (61.8)         | 2.03 (1.16, 3.55)                         | 0.0130               | 0.3169                            | 0.7298                           | 0.01                                 | 0.4679                |
|                                      | No    | 517 (45.0)        | reference group                           |                      |                                   |                                  |                                      |                       |
| Annoyance with<br>vibrations/rattles | High  | 15 (78.9)         | 4.68 (1.54, 14.21)                        | 0.0065               | 0.3439                            | 0.6907                           | 0.01                                 | 0.5355                |
|                                      | Low   | 536 (45.3)        | reference group                           |                      |                                   |                                  |                                      |                       |
| Migraines                            | Yes   | 191 (67.5)        | 3.24 (2.44, 4.30)                         | <0.0001              | 0.2860                            | 0.3486                           | 0.08                                 | 0.8526                |
|                                      | No    | 364 (39.4)        | reference group                           |                      |                                   |                                  |                                      |                       |
| Dizziness                            | Yes   | 182 (68.2)        | 3.27 (2.45, 4.36)                         | <0.0001              | 0.3240                            | 0.6267                           | 0.07                                 | 0.6166                |
|                                      | No    | 374 (39.7)        | reference group                           |                      |                                   |                                  |                                      |                       |
| Tinnitus                             | Yes   | 177 (62.5)        | 2.40 (1.83, 3.16)                         | <0.0001              | 0.4615                            | 0.7113                           | 0.04                                 | 0.1642                |
|                                      | No    | 379 (41.0)        | reference group                           |                      |                                   |                                  |                                      |                       |

| Variable                              | Group | n(%) <sup>b</sup> | PSQI <sup>a</sup><br>OR (CI) <sup>c</sup> | p-value <sup>d</sup> | Sound Bin<br>p-value <sup>e</sup> | Province<br>p-value <sup>f</sup> | Nagelkerke<br>pseudo R <sup>2g</sup> | H-L test <sup>h</sup> |
|---------------------------------------|-------|-------------------|-------------------------------------------|----------------------|-----------------------------------|----------------------------------|--------------------------------------|-----------------------|
| Chronic Pain                          | Yes   | 186 (66.2)        | 3.00 (2.26, 3.97)                         | <0.0001              | 0.4966                            | 0.3357                           | 0.07                                 | 0.9125                |
|                                       | No    | 368 (39.8)        | reference group                           |                      |                                   |                                  |                                      |                       |
| Asthma                                | Yes   | 67 (66.3)         | 2.48 (1.61, 3.81)                         | <0.0001              | 0.5669                            | 0.7078                           | 0.02                                 | 0.2872                |
|                                       | No    | 489 (44.2)        | reference group                           |                      |                                   |                                  |                                      |                       |
| Arthritis                             | Yes   | 223 (57.5)        | 1.99 (1.55, 2.54)                         | <0.0001              | 0.5230                            | 0.5560                           | 0.03                                 | 0.9741                |
|                                       | No    | 332 (40.5)        | reference group                           |                      |                                   |                                  |                                      |                       |
| Chronic bronchitis/<br>emphysema/COPD | Yes   | 48 (67.6)         | 2.61 (1.56, 4.35)                         | 0.0002               | 0.5513                            | 0.5685                           | 0.02                                 | 0.6635                |
|                                       | No    | 506 (44.6)        | reference group                           |                      |                                   |                                  |                                      |                       |
| Diabetes                              | Yes   | 61 (55.5)         | 1.52 (1.02, 2.25)                         | 0.0389               | 0.4626                            | 0.8218                           | 0.01                                 | 0.7391                |
|                                       | No    | 493 (45.0)        | reference group                           |                      |                                   |                                  |                                      |                       |
| Heart disease                         | Yes   | 53 (56.4)         | 1.56 (1.02, 2.39)                         | 0.0403               | 0.5185                            | 0.7036                           | 0.01                                 | 0.4127                |
|                                       | No    | 503 (45.2)        | reference group                           |                      |                                   |                                  |                                      |                       |
| Diagnosed sleep disorder              | Yes   | 85 (71.4)         | 3.32 (2.19, 5.03)                         | <0.0001              | 0.5804                            | 0.3919                           | 0.04                                 | 0.9639                |
|                                       | No    | 471 (43.3)        | reference group                           |                      |                                   |                                  |                                      |                       |
| Restless leg syndrome                 | Yes   | 114 (67.1)        | 2.79 (1.98, 3.94)                         | <0.0001              | 0.3419                            | 0.4184                           | 0.04                                 | 0.8848                |
|                                       | No    | 442 (42.6)        | reference group                           |                      |                                   |                                  |                                      |                       |

<sup>a</sup> the logistic regression is modelling the probability of poor sleep or a global PSQI score >5

<sup>b</sup> observed frequency and proportion of people with "poor sleep" in each subgroup of variable

<sup>c</sup> OR(CI) odds ratio and 95% confidence interval based on logistic regression model with reference group as indicated for each variable in the table

<sup>d</sup> p-value from logistic regression model testing the significant difference between prevalence rates in the subgroups of interest listed in "Variable" column

<sup>e</sup> p-value from logistic regression model testing the significant difference between prevalence rates in WTN exposure groups

<sup>f</sup> p-value from logistic regression model testing the significant difference between prevalence rates between the two provinces

<sup>g</sup> Nagelkerke pseudo R<sup>2</sup> is a measure of the explained variance in the model and is referred to as a generalization of the coefficient of determination

<sup>h</sup> H-L: Hosmer-Lemeshow goodness of fit test, p>0.05 indicates a good fit

<sup>i</sup> Unemployment includes stay at home parents, retired, as well as not currently employed

<sup>j</sup> slope (b) and standard error (SE) of slope in logistic regression model

| Variable | Group | n(%) <sup>b</sup> | PSQI <sup>a</sup><br>OR (CI) <sup>c</sup> | p-value <sup>d</sup> | Sound Bin<br>p-value <sup>e</sup> | Province<br>p-value <sup>f</sup> | Nagelkerke<br>pseudo R <sup>2g</sup> | H-L test <sup>h</sup> |
|----------|-------|-------------------|-------------------------------------------|----------------------|-----------------------------------|----------------------------------|--------------------------------------|-----------------------|
|----------|-------|-------------------|-------------------------------------------|----------------------|-----------------------------------|----------------------------------|--------------------------------------|-----------------------|

<sup>k</sup> coefficient of WTN was negative indicating that for every unit increase (moving towards the louder WTN groups), the proportion of people with “poor sleep” decreased. Though the proportion of people with “poor sleep” was significantly higher among those who had to close their windows due to WTN (p<0.0001), this proportion did decrease as the WTN exposure group increased. It is interesting to note here that when participants receiving personal benefits were removed from the analysis there was no relationship between the proportion of respondents with “poor sleep” and WTN exposure group.

<sup>l</sup> coefficient of WTN was negative indicating that for every unit increase (moving towards the louder WTN groups), the proportion of people with “poor sleep” decreased. Though the proportion of people with “poor sleep” was significantly higher among those who hear WTN or specified that WTN was a cause for sleep disturbance, this proportion did decrease as the WTN exposure group increased. It is interesting to note here that when participants receiving personal benefits were removed from the analysis there was no relationship between the proportion of respondents with “poor sleep” and WTN exposure group.

<sup>m</sup> Evaluates the magnitude of reported sleep disturbance for any reason over the previous year while at home

**Supplementary Table II: The influence of personal and situational variables on actigraphy measures**

| Variable <sup>i</sup>             | Group                               | n(%) <sup>c</sup> | mean (CI) <sup>a</sup> | Sleep Latency   |                      |        |               |          |
|-----------------------------------|-------------------------------------|-------------------|------------------------|-----------------|----------------------|--------|---------------|----------|
|                                   |                                     |                   |                        | Pair wise tests | p-value <sup>b</sup> |        |               |          |
|                                   |                                     |                   | Variable               |                 | Sound Bin            | Day    | SoundBin *Day | Province |
| WTN levels                        | <25dBA                              | 46 (7.0)          | 16.34 (11.40, 21.28)   |                 | 0.9051               | 0.8435 | 0.3254        | 0.9182   |
|                                   | [25-30]dBA                          | 48 (7.3)          | 12.34 (8.88, 15.80)    |                 |                      |        |               |          |
|                                   | [30-35]dBA                          | 164 (25.1)        | 12.51 (10.54, 14.49)   |                 |                      |        |               |          |
|                                   | [35-40]dBA                          | 272 (41.6)        | 13.02 (11.39, 14.65)   |                 |                      |        |               |          |
|                                   | [40-46]dBA                          | 124 (19.0)        | 12.64 (10.50, 14.78)   |                 |                      |        |               |          |
| Background nighttime sound (BNTS) | <40 dBA                             | 159 (24.3)        | 13.14 (10.99, 15.29)   | 0.7780          | 0.8521               | 0.8469 | 0.3258        | 0.6719   |
|                                   | [40, 50) dBA                        | 224 (34.3)        | 14.10 (12.03, 16.16)   |                 |                      |        |               |          |
|                                   | [50, 55) dBA                        | 237 (36.2)        | 13.24 (11.10, 15.38)   |                 |                      |        |               |          |
|                                   | >=55 dBA                            | 34 (5.2)          | 11.20 (8.13, 14.27)    |                 |                      |        |               |          |
| Sex                               | Male                                | 289 (44.2)        | 14.65 (12.95, 16.34)   | 0.0604          | 0.8957               | 0.8414 | 0.3278        | 0.9879   |
|                                   | Female                              | 365 (55.8)        | 12.45 (10.77, 14.13)   |                 |                      |        |               |          |
| Age group                         | ≤24                                 | 32 (4.9)          | 13.35 (8.57, 18.14)    | 0.0720          | 0.8649               | 0.8481 | 0.3277        | 0.9446   |
|                                   | 25-44                               | 148 (22.6)        | 10.78 (8.94, 12.62)    |                 |                      |        |               |          |
|                                   | 45-64                               | 302 (46.2)        | 13.40 (11.68, 15.12)   |                 |                      |        |               |          |
|                                   | 65+                                 | 172 (26.3)        | 15.63 (13.20, 18.06)   |                 |                      |        |               |          |
| Marital Status                    | Married/Common-law                  | 451 (69.0)        | 13.27 (11.72, 14.82)   | 0.8743          | 0.9095               | 0.8462 | 0.3247        | 0.9441   |
|                                   | Widowed/Separated/Divorced          | 125 (19.1)        | 14.39 (11.70, 17.08)   |                 |                      |        |               |          |
|                                   | Single, never been married          | 78 (11.9)         | 12.24 (9.71, 14.76)    |                 |                      |        |               |          |
| Employment                        | Yes                                 | 327 (50.0)        | 12.49 (10.99, 13.98)   | 0.2682          | 0.9059               | 0.8452 | 0.3280        | 0.9111   |
|                                   | No                                  | 327 (50.0)        | 14.16 (12.35, 15.97)   |                 |                      |        |               |          |
| Employment Schedule               | regular daytime/evening shift       | 307 (46.9)        | 12.57 (11.02, 14.13)   | 0.4095          | 0.9107               | 0.8457 | 0.3334        | 0.9132   |
|                                   | Split shift/on call or casual/other | 20 (3.1)          | 11.40 (7.23, 15.56)    |                 |                      |        |               |          |
|                                   | Unemployed <sup>M</sup>             | 327 (50.0)        | 14.17 (12.36, 15.98)   |                 |                      |        |               |          |
| Level of Education                | ≤High School                        | 355 (54.3)        | 14.05 (12.34, 15.76)   | 0.3417          | 0.8833               | 0.8454 | 0.3240        | 0.8942   |
|                                   | Trade/Certificate/College           | 240 (36.7)        | 12.55 (10.72, 14.37)   |                 |                      |        |               |          |
|                                   | University                          | 59 (9.0)          | 12.63 (9.53, 15.74)    |                 |                      |        |               |          |

| Variable <sup>i</sup>                        | Group                  | n(%) <sup>c</sup> | mean (CI) <sup>a</sup> | Sleep Latency   |                      |           |        |               |          |
|----------------------------------------------|------------------------|-------------------|------------------------|-----------------|----------------------|-----------|--------|---------------|----------|
|                                              |                        |                   |                        | Pair wise tests | p-value <sup>b</sup> |           |        |               |          |
|                                              |                        |                   |                        |                 | Variable             | Sound Bin | Day    | SoundBin *Day | Province |
| Income                                       | <60K                   | 303 (46.3)        | 13.82 (12.14, 15.50)   | 0.0887          | 0.7785               | 0.9528    | 0.2952 | 0.9114        |          |
|                                              | 60-100K                | 150 (22.9)        | 14.44 (11.90, 16.98)   |                 |                      |           |        |               |          |
|                                              | ≥100K                  | 121 (18.5)        | 11.69 (9.53, 13.85)    |                 |                      |           |        |               |          |
| Alcohol use                                  | Do not drink alcohol   | 167 (25.5)        | 13.31 (10.96, 15.67)   | 0.9364          | 0.9131               | 0.8431    | 0.3219 | 0.9484        |          |
|                                              | ≤3 times/month         | 254 (38.8)        | 14.09 (12.27, 15.91)   |                 |                      |           |        |               |          |
|                                              | 1-3 times/week         | 149 (22.8)        | 12.10 (10.39, 13.81)   |                 |                      |           |        |               |          |
|                                              | ≥4 times/week          | 84 (12.8)         | 13.51 (9.82, 17.19)    |                 |                      |           |        |               |          |
| Smoking status                               | Current                | 136 (20.8)        | 13.61 (11.03, 16.20)   | 0.2904          | 0.9058               | 0.8447    | 0.3245 | 0.8595        |          |
|                                              | former                 | 230 (35.2)        | 13.57 (11.68, 15.46)   |                 |                      |           |        |               |          |
|                                              | never                  | 288 (44.0)        | 13.07 (11.29, 14.84)   |                 |                      |           |        |               |          |
| BMI group                                    | <25 underweight-normal | 193 (30.9)        | 12.04 (9.93, 14.16)    | A               | 0.0012               | 0.8999    | 0.7878 | 0.3217        | 0.6897   |
|                                              | [25-30) overweight     | 232 (37.1)        | 13.38 (11.44, 15.32)   | AB              |                      |           |        |               |          |
|                                              | ≥30 obese              | 200 (32.0)        | 15.72 (13.58, 17.87)   | B               |                      |           |        |               |          |
| Caffeine consumption                         | None                   | 81 (12.4)         | 11.68 (9.32, 14.04)    | 0.3924          | 0.9401               | 0.8442    | 0.3275 | 0.8670        |          |
|                                              | 1 or 2 cups/day        | 319 (48.8)        | 12.55 (10.95, 14.15)   |                 |                      |           |        |               |          |
|                                              | 3 or 4 cups/day        | 178 (27.2)        | 15.23 (12.68, 17.77)   |                 |                      |           |        |               |          |
|                                              | 5 or more cups/day     | 76 (11.6)         | 13.58 (11.07, 16.09)   |                 |                      |           |        |               |          |
| Self-reported sleep disturbance <sup>n</sup> | High                   | 85 (13.0)         | 12.89 (10.31, 15.47)   | 0.8840          | 0.9082               | 0.8430    | 0.3285 | 0.9031        |          |
|                                              | Low                    | 568 (86.9)        | 13.43 (12.03, 14.83)   |                 |                      |           |        |               |          |
| Sleep medication                             | Yes                    | 85 (13.0)         | 13.55 (10.67, 16.43)   | 0.5214          | 0.9167               | 0.8479    | 0.3252 | 0.9375        |          |
|                                              | No                     | 569 (87.0)        | 13.34 (11.92, 14.75)   |                 |                      |           |        |               |          |
| Type of dwelling                             | Single detached homes  | 593 (90.7)        | 13.52 (12.06, 14.97)   | 0.5081          | 0.8772               | 0.8412    | 0.3271 | 0.9416        |          |
|                                              | semi/duplex/apartment  | 61 (9.3)          | 12.35 (9.52, 15.17)    |                 |                      |           |        |               |          |
| Property ownership                           | Own                    | 568 (86.9)        | 13.05 (11.57, 14.53)   | 0.9284          | 0.9094               | 0.8435    | 0.3254 | 0.9101        |          |
|                                              | rent                   | 86 (13.2)         | 15.11 (11.42, 18.79)   |                 |                      |           |        |               |          |
| Façade type                                  | Fully Bricked          | 188 (28.8)        | 12.51 (10.27, 14.76)   | 0.4486          | 0.8711               | 0.8444    | 0.3285 | 0.6401        |          |
|                                              | Partially Bricked      | 102 (15.6)        | 13.38 (10.40, 16.35)   |                 |                      |           |        |               |          |
|                                              | No Brick/Other         | 364 (55.7)        | 13.62 (12.10, 15.14)   |                 |                      |           |        |               |          |
| Bedroom volume (1000ft <sup>3</sup> )        | b(SE)                  | 639 (97.7)        | 0.0280 (0.0466)        | 0.5511          | 0.8960               | 0.8455    | 0.2449 | 0.7271        |          |

| Variable <sup>i</sup>                                             | Group                        | n(%) <sup>c</sup> | mean (CI) <sup>a</sup> | Sleep Latency   |                      |           |        |               |          |
|-------------------------------------------------------------------|------------------------------|-------------------|------------------------|-----------------|----------------------|-----------|--------|---------------|----------|
|                                                                   |                              |                   |                        | Pair wise tests | p-value <sup>b</sup> |           |        |               |          |
|                                                                   |                              |                   |                        |                 | Variable             | Sound Bin | Day    | SoundBin *Day | Province |
| Bedroom location                                                  | Basement                     | 14 (2.1)          | 14.14 (8.18, 20.11)    | 0.7716          | 0.9097               | 0.8411    | 0.3255 | 0.8837        |          |
|                                                                   | First floor                  | 453 (69.3)        | 13.16 (11.70, 14.62)   |                 |                      |           |        |               |          |
|                                                                   | Second floor or higher       | 187 (28.6)        | 13.72 (11.53, 15.91)   |                 |                      |           |        |               |          |
| Closing bedroom window to block outside noise                     | Yes                          | 211 (32.3)        | 12.22 (10.42, 14.01)   | 0.1731          | 0.8759               | 0.8457    | 0.2667 | 0.8628        |          |
|                                                                   | No                           | 440 (67.3)        | 13.94 (12.36, 15.52)   |                 |                      |           |        |               |          |
| <b>Source identified as cause for closing window:<sup>L</sup></b> |                              |                   |                        |                 |                      |           |        |               |          |
| Road traffic                                                      | Yes                          | 95 (14.5)         | 11.82 (9.73, 13.91)    | 0.5376          | 0.8940               | 0.8519    | 0.2725 | 0.8674        |          |
|                                                                   | No                           | 555 (84.9)        | 13.67 (12.21, 15.13)   |                 |                      |           |        |               |          |
| Rail                                                              | Yes                          | 11 (1.7)          | 6.84 (3.03, 10.65)     | 0.3970          | 0.8671               | 0.8477    | 0.2734 | 0.8157        |          |
|                                                                   | No                           | 639 (97.7)        | 13.51 (12.15, 14.87)   |                 |                      |           |        |               |          |
| Wind turbines                                                     | Yes                          | 70 (10.7)         | 13.28 (10.53, 16.04)   | 0.4974          | 0.8913               | 0.8491    | 0.2726 | 0.8816        |          |
|                                                                   | No                           | 580 (88.7)        | 13.39 (12.02, 14.75)   |                 |                      |           |        |               |          |
| Other                                                             | Yes                          | 89 (13.6)         | 12.07 (9.35, 14.79)    | 0.0607          | 0.8860               | 0.8530    | 0.2760 | 0.9154        |          |
|                                                                   | No                           | 561 (85.8)        | 13.63 (12.24, 15.02)   |                 |                      |           |        |               |          |
| Sleep improved by closing window                                  | Yes                          | 169 (25.8)        | 12.52 (10.54, 14.50)   | 0.4171          | 0.8814               | 0.8552    | 0.2903 | 0.8414        |          |
|                                                                   | No                           | 39 (6.0)          | 11.11 (8.39, 13.82)    |                 |                      |           |        |               |          |
|                                                                   | Did not need to close window | 440 (67.3)        | 13.93 (12.35, 15.51)   |                 |                      |           |        |               |          |
| Bedroom window type                                               | Single pane                  | 57 (8.7)          | 12.22 (8.01, 16.43)    | 0.2285          | 0.9100               | 0.8169    | 0.3610 | 0.8956        |          |
|                                                                   | Double pane                  | 581 (88.8)        | 13.49 (12.05, 14.92)   |                 |                      |           |        |               |          |
|                                                                   | Triple pane                  | 15 (2.3)          | 14.67 (5.97, 23.36)    |                 |                      |           |        |               |          |
| Bedroom on quiet side                                             | Yes                          | 370 (56.6)        | 12.87 (11.28, 14.45)   | 0.5257          | 0.8919               | 0.8418    | 0.3188 | 0.9094        |          |
|                                                                   | No                           | 237 (36.2)        | 13.67 (11.65, 15.69)   |                 |                      |           |        |               |          |
|                                                                   | There is no quiet side       | 46 (7.0)          | 15.81 (10.85, 20.77)   |                 |                      |           |        |               |          |
| Air conditioner in dwelling                                       | Yes                          | 497 (76.0)        | 13.25 (11.43, 15.07)   | 0.9051          | 0.9051               | 0.8434    | 0.3254 | 0.8761        |          |
|                                                                   | No                           | 157 (24.0)        | 13.54 (11.21, 15.87)   |                 |                      |           |        |               |          |
| Air conditioning unit in bedroom                                  | Yes                          | 47 (7.2)          | 10.31 (7.89, 12.73)    | 0.6744          | 0.9034               | 0.8448    | 0.3251 | 0.9905        |          |
|                                                                   | No                           | 63 (9.6)          | 15.15 (11.11, 19.19)   |                 |                      |           |        |               |          |
|                                                                   | central AC or other          | 387 (59.2)        | 13.50 (11.39, 15.62)   |                 |                      |           |        |               |          |
|                                                                   | NO AC                        | 157 (24.0)        | 13.42 (11.09, 15.75)   |                 |                      |           |        |               |          |

| Variable <sup>i</sup>                      | Group                     | n(%) <sup>c</sup> | mean (CI) <sup>a</sup> | Sleep Latency   |                      |           |        |               |
|--------------------------------------------|---------------------------|-------------------|------------------------|-----------------|----------------------|-----------|--------|---------------|
|                                            |                           |                   |                        | Pair wise tests | p-value <sup>b</sup> |           |        |               |
|                                            |                           |                   |                        |                 | Variable             | Sound Bin | Day    | SoundBin *Day |
| Any windows in the room in which you slept | Yes                       | 3258 <sup>j</sup> | 13.10 (11.65, 14.55)   | 0.6269          | 0.7004               | 0.7763    | 0.2904 | 0.6182        |
|                                            | No                        | 194 <sup>j</sup>  | 16.37 (11.60, 21.13)   |                 |                      |           |        |               |
| At least one window open                   | Yes                       | 1368 <sup>j</sup> | 13.43 (11.29, 15.57)   | 0.8550          | 0.5761               | 0.4787    | 0.2659 | 0.5646        |
|                                            | No                        | 1854 <sup>j</sup> | 13.20 (11.70, 14.70)   |                 |                      |           |        |               |
| Number of years hearing the WT             | Do not hear wind turbines | 331 (50.6)        | 13.41 (11.76, 15.07)   | 0.4124          | 0.7706               | 0.8504    | 0.3500 | 0.8900        |
|                                            | less than 1 year          | 30 (4.6)          | 11.46 (8.79, 14.13)    |                 |                      |           |        |               |
|                                            | 1 year or more            | 291 (44.5)        | 13.58 (11.71, 15.44)   |                 |                      |           |        |               |
| Complaint about WT                         | Yes                       | 26 (4.0)          | 9.85 (7.34, 12.37)     | 0.0727          | 0.9131               | 0.8517    | 0.3474 | 0.9557        |
|                                            | No                        | 625 (95.6)        | 13.54 (12.18, 14.90)   |                 |                      |           |        |               |
| Concerned about physical safety            | High                      | 41 (6.3)          | 10.69 (7.94, 13.45)    | 0.2868          | 0.9084               | 0.8676    | 0.3392 | 0.6970        |
|                                            | Low                       | 608 (93.0)        | 13.45 (12.09, 14.81)   |                 |                      |           |        |               |
| Personal benefits                          | Yes                       | 59 (9.0)          | 14.73 (10.31, 19.16)   | 0.8494          | 0.8903               | 0.8718    | 0.4202 | 0.8522        |
|                                            | No                        | 571 (87.3)        | 13.13 (11.77, 14.49)   |                 |                      |           |        |               |
| Audible wind turbines                      | Yes                       | 323 (49.4)        | 13.32 (11.56, 15.07)   | 0.2049          | 0.7527               | 0.8473    | 0.3266 | 0.8556        |
|                                            | No                        | 331 (50.6)        | 13.40 (11.75, 15.05)   |                 |                      |           |        |               |
| Audible road traffic                       | Yes                       | 546 (83.5)        | 13.52 (12.17, 14.87)   | 0.3236          | 0.8861               | 0.8506    | 0.3224 | 0.8780        |
|                                            | No                        | 108 (16.5)        | 12.72 (9.96, 15.47)    |                 |                      |           |        |               |
| Audible aircraft                           | Yes                       | 347 (53.1)        | 13.70 (11.98, 15.42)   | 0.7698          | 0.9074               | 0.8443    | 0.3252 | 0.9009        |
|                                            | No                        | 307 (46.9)        | 12.97 (11.32, 14.62)   |                 |                      |           |        |               |
| Audible rail                               | Yes                       | 120 (18.4)        | 13.98 (10.94, 17.03)   | 0.3607          | 0.9286               | 0.8445    | 0.3218 | 0.8725        |
|                                            | No                        | 534 (81.7)        | 13.25 (11.91, 14.60)   |                 |                      |           |        |               |
| ONT: audible rail                          | Yes                       | 120 (23.7)        | 14.83 (11.85, 17.80)   | 0.2817          | 0.8597               | 0.7146    | 0.8760 |               |
|                                            | No                        | 387 (76.3)        | 13.97 (12.17, 15.77)   |                 |                      |           |        |               |
| Annoyed by snoring                         | High                      | 33 (5.1)          | 15.36 (9.60, 21.12)    | 0.1684          | 0.8898               | 0.8415    | 0.3217 | 0.9235        |
|                                            | Low                       | 621 (95.0)        | 13.28 (11.91, 14.65)   |                 |                      |           |        |               |
| <b>Source of sleep disturbance</b>         |                           |                   |                        |                 |                      |           |        |               |
| Wind turbines                              | Yes                       | 37 (5.7)          | 12.18 (9.16, 15.20)    | 0.4626          | 0.8627               | 0.8373    | 0.4470 | 0.9388        |
|                                            | No                        | 594 (90.8)        | 13.43 (12.04, 14.81)   |                 |                      |           |        |               |

| Variable <sup>i</sup>             | Group | n(%) <sup>c</sup> | mean (CI) <sup>a</sup> | Sleep Latency   |                      |           |        |               |          |
|-----------------------------------|-------|-------------------|------------------------|-----------------|----------------------|-----------|--------|---------------|----------|
|                                   |       |                   |                        | Pair wise tests | p-value <sup>b</sup> |           |        |               |          |
|                                   |       |                   |                        |                 | Variable             | Sound Bin | Day    | SoundBin *Day | Province |
| Children                          | Yes   | 45 (6.9)          | 14.74 (9.85, 19.63)    | 0.6072          | 0.8765               | 0.8404    | 0.4465 | 0.9122        |          |
|                                   | No    | 586 (89.6)        | 13.26 (11.92, 14.60)   |                 |                      |           |        |               |          |
| Pets                              | Yes   | 47 (7.2)          | 11.35 (8.22, 14.48)    | A               | 0.0229               | 0.9098    | 0.8457 | 0.4385        | 0.7606   |
|                                   | No    | 584 (89.3)        | 13.53 (12.12, 14.94)   | B               |                      |           |        |               |          |
| Neighbours                        | Yes   | 20 (3.1)          | 12.94 (8.19, 17.68)    | 0.7633          | 0.8795               | 0.8388    | 0.4463 | 0.8711        |          |
|                                   | No    | 611 (93.4)        | 13.40 (12.01, 14.79)   |                 |                      |           |        |               |          |
| Stress/anxiety                    | Yes   | 35 (5.4)          | 10.30 (7.41, 13.18)    | 0.2436          | 0.8608               | 0.8361    | 0.4481 | 0.8739        |          |
|                                   | No    | 596 (91.1)        | 13.56 (12.15, 14.98)   |                 |                      |           |        |               |          |
| Health related/physical pain      | Yes   | 84 (12.8)         | 11.60 (8.82, 14.38)    | 0.1644          | 0.8473               | 0.8378    | 0.4482 | 0.8448        |          |
|                                   | No    | 547 (83.6)        | 13.65 (12.18, 15.12)   |                 |                      |           |        |               |          |
| Snoring                           | Yes   | 32 (4.9)          | 16.97 (9.51, 24.43)    | 0.4505          | 0.8912               | 0.8373    | 0.4446 | 0.8908        |          |
|                                   | No    | 599 (91.6)        | 13.19 (11.86, 14.52)   |                 |                      |           |        |               |          |
| Other                             | Yes   | 312 (47.7)        | 13.18 (11.44, 14.92)   | 0.7883          | 0.8937               | 0.8391    | 0.4458 | 0.9105        |          |
|                                   | No    | 319 (48.8)        | 13.56 (11.88, 15.25)   |                 |                      |           |        |               |          |
| Sensitivity to noise              | High  | 99 (15.1)         | 11.34 (9.26, 13.43)    | 0.2964          | 0.8962               | 0.8600    | 0.3393 | 0.8042        |          |
|                                   | Low   | 552 (84.4)        | 13.68 (12.26, 15.11)   |                 |                      |           |        |               |          |
| Annoyance to WTN                  | High  | 42 (6.4)          | 11.96 (8.43, 15.49)    | 0.2646          | 0.9212               | 0.8507    | 0.3326 | 0.9296        |          |
|                                   | Low   | 611 (93.4)        | 13.45 (12.11, 14.80)   |                 |                      |           |        |               |          |
| Annoyance with blinking lights    | High  | 59 (9.0)          | 12.01 (9.05, 14.96)    | 0.5677          | 0.9146               | 0.8500    | 0.3319 | 0.9361        |          |
|                                   | Low   | 594 (90.8)        | 13.47 (12.12, 14.82)   |                 |                      |           |        |               |          |
| Shadow flicker annoyance          | High  | 44 (6.7)          | 11.77 (8.88, 14.67)    | 0.6473          | 0.8975               | 0.8420    | 0.3483 | 0.9810        |          |
|                                   | Low   | 608 (93.0)        | 13.48 (12.12, 14.84)   |                 |                      |           |        |               |          |
| Notice vibrations                 | Yes   | 32 (4.9)          | 13.12 (10.33, 15.91)   | 0.3628          | 0.9056               | 0.8493    | 0.3593 | 0.9468        |          |
|                                   | No    | 616 (94.2)        | 13.49 (12.12, 14.85)   |                 |                      |           |        |               |          |
| Annoyance with vibrations/rattles | High  | 9 (1.4)           | 15.12 (10.24, 20.00)   | 0.1595          | 0.9072               | 0.8478    | 0.3591 | 0.9025        |          |
|                                   | Low   | 639 (97.7)        | 13.46 (12.11, 14.80)   |                 |                      |           |        |               |          |
| Migraines                         | Yes   | 171 (26.2)        | 12.05 (10.28, 13.81)   | 0.7449          | 0.9019               | 0.8441    | 0.3252 | 0.8994        |          |
|                                   | No    | 483 (73.9)        | 13.76 (12.25, 15.26)   |                 |                      |           |        |               |          |
| Dizziness                         | Yes   | 163 (24.9)        | 12.25 (10.43, 14.06)   | 0.5889          | 0.9010               | 0.8449    | 0.3245 | 0.9061        |          |
|                                   | No    | 491 (75.1)        | 13.72 (12.21, 15.24)   |                 |                      |           |        |               |          |

| Variable <sup>i</sup>                 | Group | n(%) <sup>c</sup> | mean (CI) <sup>a</sup> | Pair wise tests | Sleep Latency |           |                      |        |          |
|---------------------------------------|-------|-------------------|------------------------|-----------------|---------------|-----------|----------------------|--------|----------|
|                                       |       |                   |                        |                 | Variable      | Sound Bin | p-value <sup>b</sup> |        |          |
|                                       |       |                   |                        |                 |               |           | Day                  | *Day   | Province |
| Tinnitus                              | Yes   | 163 (24.9)        | 12.89 (10.86, 14.92)   | 0.4156          | 0.9143        | 0.8385    | 0.3152               | 0.8422 |          |
|                                       | No    | 490 (74.9)        | 13.55 (12.05, 15.05)   |                 |               |           |                      |        |          |
| Chronic Pain                          | Yes   | 175 (26.8)        | 13.21 (11.10, 15.32)   | 0.8500          | 0.8982        | 0.8452    | 0.3156               | 0.8648 |          |
|                                       | No    | 478 (73.1)        | 13.40 (11.94, 14.86)   |                 |               |           |                      |        |          |
| Asthma                                | Yes   | 59 (9.0)          | 9.06 (6.70, 11.42)     | A               | 0.0092        | 0.8675    | 0.8444               | 0.3196 | 0.8713   |
|                                       | No    | 595 (91.0)        | 13.86 (12.45, 15.28)   |                 |               |           |                      |        |          |
| Arthritis                             | Yes   | 225 (34.4)        | 12.65 (11.00, 14.31)   | 0.6885          | 0.9025        | 0.8436    | 0.3253               | 0.9313 |          |
|                                       | No    | 429 (65.6)        | 13.74 (12.14, 15.34)   |                 |               |           |                      |        |          |
| Chronic bronchitis/<br>emphysema/COPD | Yes   | 46 (7.0)          | 14.04 (8.50, 19.58)    | 0.2925          | 0.9069        | 0.8258    | 0.3672               | 0.8568 |          |
|                                       | No    | 607 (92.8)        | 13.31 (11.99, 14.63)   |                 |               |           |                      |        |          |
| Diabetes                              | Yes   | 70 (10.7)         | 14.49 (10.70, 18.27)   | 0.2908          | 0.9085        | 0.8406    | 0.3207               | 0.8532 |          |
|                                       | No    | 584 (89.3)        | 13.20 (11.90, 14.51)   |                 |               |           |                      |        |          |
| Heart disease                         | Yes   | 54 (8.3)          | 14.06 (10.30, 17.82)   | 0.2573          | 0.9266        | 0.8455    | 0.3283               | 0.9261 |          |
|                                       | No    | 600 (91.7)        | 13.30 (11.88, 14.71)   |                 |               |           |                      |        |          |
| Diagnosed sleep disorder              | Yes   | 64 (9.8)          | 12.95 (9.98, 15.91)    | 0.4491          | 0.9330        | 0.8454    | 0.3252               | 0.9845 |          |
|                                       | No    | 590 (90.2)        | 13.42 (11.98, 14.85)   |                 |               |           |                      |        |          |
| Restless leg syndrome                 | Yes   | 98 (15.0)         | 14.09 (10.80, 17.37)   | 0.9192          | 0.9065        | 0.8435    | 0.3252               | 0.9152 |          |
|                                       | No    | 556 (85.0)        | 13.26 (11.93, 14.59)   |                 |               |           |                      |        |          |

<sup>a</sup> Least square means based on original scale of data and corresponding 95% confidence interval (CI), linear mixed effects model

<sup>b</sup> p-values for the different factors in the mixed effect model based on log(x+1) for sleep latency

<sup>c</sup> observed frequency and proportion of respondents in each subgroup of variable. The % does not always sum to 100 due to missing values

<sup>i</sup> pregnancy status was also considered, but analysis was not conducted due to the small number of pregnant women who participated in the sleep actimetry component of the study (n<5)

<sup>j</sup> based on the number of sleep nights, because people could have slept in a different room on a particular night, or window was open on only certain nights

| Variable <sup>i</sup> | Group | n(%) <sup>c</sup> | mean (CI) <sup>a</sup> | Pair<br>wise<br>tests | Sleep Latency            |     |                                          | Province |
|-----------------------|-------|-------------------|------------------------|-----------------------|--------------------------|-----|------------------------------------------|----------|
|                       |       |                   |                        |                       | Sound<br>Variable<br>Bin | Day | p-value <sup>b</sup><br>SoundBin<br>*Day |          |

<sup>L</sup> Aircraft noise leading to closure of bedroom window was also considered, but analysis was not conducted due to the small number of these responses (n<5)

<sup>M</sup> Unemployment includes stay at home parents, retired, as well as not currently employed

<sup>n</sup> Evaluates the magnitude of reported sleep disturbance for any reason over the previous year while at home

Repeated-measures data from all wrist actigraphy measurements were modeled using the generalized estimating equations (GEE) method. Each of the listed variable represents a separate univariate GEE regression model for the modeled actigraphy endpoint explained by that variable and adjusted for WTN levels, province, day of the week, and the interaction between WTN groups and day of the week. It should be emphasized that variables considered in the univariate analysis have been previously demonstrated to be related to the modeled endpoint and/or considered by the authors to conceptually have a potential association with the modeled endpoint. As the analysis of each listed variable only adjusts for WTN category and province, interpretation of any individual relationship must be made with caution. The wrist actigraphy endpoint of number of awakening bouts does not follow a normal distribution; therefore to analyze awakening bouts a Poisson distribution was assumed. The number of awakening bouts was analyzed with respect to the total time spent in bed and is reported as a rate of the number of awakening bouts per 60 min in bed. Sleep efficiency, sleep latency, and WASO were transformed in order to normalize the data and stabilize the variance. In the GEE models, statistical tests were based on transformed data. Because back-transformation was not possible for some endpoints, the arithmetic mean (least squares mean [LSM]) is presented for all endpoints.

**Supplementary Table II: The influence of personal and situational variables on actigraphy measures**

| Variable <sup>i</sup>             | Group                               | n(%) <sup>c</sup> | mean (CI) <sup>a</sup> | Pair wise tests | Sleep Efficiency |           |        |               |          |
|-----------------------------------|-------------------------------------|-------------------|------------------------|-----------------|------------------|-----------|--------|---------------|----------|
|                                   |                                     |                   |                        |                 | Variable         | Sound Bin | Day    | SoundBin *Day | Province |
| WTN levels                        | <25dBA                              | 46 (7.0)          | 84.71 (83.25, 86.17)   |                 | 0.2420           | 0.7549    | 0.1862 | 0.9229        |          |
|                                   | [25-30)dBA                          | 48 (7.3)          | 86.49 (85.12, 87.87)   |                 |                  |           |        |               |          |
|                                   | [30-35)dBA                          | 164 (25.1)        | 84.82 (83.86, 85.78)   |                 |                  |           |        |               |          |
|                                   | [35-40)dBA                          | 272 (41.6)        | 85.33 (84.60, 86.05)   |                 |                  |           |        |               |          |
|                                   | [40-46]dBA                          | 124 (19.0)        | 85.01 (84.05, 85.98)   |                 |                  |           |        |               |          |
| Background nighttime sound (BNTS) | <40 dBA                             | 159 (24.3)        | 85.38 (84.44, 86.33)   | 0.7166          | 0.2977           | 0.7537    | 0.1810 | 0.9907        |          |
|                                   | [40, 50) dBA                        | 224 (34.3)        | 85.36 (84.38, 86.33)   |                 |                  |           |        |               |          |
|                                   | [50, 55) dBA                        | 237 (36.2)        | 85.23 (84.42, 86.04)   |                 |                  |           |        |               |          |
|                                   | >=55 dBA                            | 34 (5.2)          | 83.98 (81.92, 86.05)   |                 |                  |           |        |               |          |
| Sex                               | Male                                | 289 (44.2)        | 84.41 (83.60, 85.22)   | A               | 0.0035           | 0.2460    | 0.7538 | 0.1862        | 0.9240   |
|                                   | Female                              | 365 (55.8)        | 85.89 (85.25, 86.52)   | B               |                  |           |        |               |          |
| Age group                         | ≤24                                 | 32 (4.9)          | 85.08 (83.38, 86.78)   | AB              | 0.0339           | 0.1354    | 0.7644 | 0.1997        | 0.9159   |
|                                   | 25-44                               | 148 (22.6)        | 86.40 (85.54, 87.25)   | A               |                  |           |        |               |          |
|                                   | 45-64                               | 302 (46.2)        | 84.81 (84.03, 85.58)   | B               |                  |           |        |               |          |
|                                   | 65+                                 | 172 (26.3)        | 85.12 (84.27, 85.97)   | AB              |                  |           |        |               |          |
| Marital Status                    | Married/Common-law                  | 451 (69.0)        | 85.43 (84.77, 86.09)   |                 | 0.3986           | 0.2827    | 0.7559 | 0.1853        | 0.9549   |
|                                   | Widowed/Separated/Divorced          | 125 (19.1)        | 84.97 (83.96, 85.97)   |                 |                  |           |        |               |          |
|                                   | Single, never been married          | 78 (11.9)         | 84.83 (83.76, 85.91)   |                 |                  |           |        |               |          |
| Employment                        | Yes                                 | 327 (50.0)        | 85.62 (84.96, 86.28)   |                 | 0.1641           | 0.2352    | 0.7515 | 0.1907        | 0.9222   |
|                                   | No                                  | 327 (50.0)        | 84.95 (84.21, 85.70)   |                 |                  |           |        |               |          |
| Employment Schedule               | regular daytime/evening shift       | 307 (46.9)        | 85.72 (85.05, 86.38)   |                 | 0.2238           | 0.1894    | 0.7543 | 0.1872        | 0.9194   |
|                                   | Split shift/on call or casual/other | 20 (3.1)          | 84.39 (81.90, 86.87)   |                 |                  |           |        |               |          |
|                                   | Unemployed <sup>M</sup>             | 327 (50.0)        | 84.96 (84.22, 85.70)   |                 |                  |           |        |               |          |
| Level of Education                | ≤High School                        | 355 (54.3)        | 84.79 (84.07, 85.50)   |                 | 0.0529           | 0.2394    | 0.7471 | 0.1860        | 0.8747   |
|                                   | Trade/Certificate/College           | 240 (36.7)        | 85.87 (85.08, 86.66)   |                 |                  |           |        |               |          |
|                                   | University                          | 59 (9.0)          | 85.73 (84.51, 86.94)   |                 |                  |           |        |               |          |

| Variable <sup>i</sup>                        | Group                  | n(%) <sup>c</sup> | mean (CI) <sup>a</sup> | Sleep Efficiency |                      |           |        |               |          |
|----------------------------------------------|------------------------|-------------------|------------------------|------------------|----------------------|-----------|--------|---------------|----------|
|                                              |                        |                   |                        | Pair wise tests  | p-value <sup>d</sup> |           |        |               |          |
|                                              |                        |                   |                        |                  | Variable             | Sound Bin | Day    | SoundBin *Day | Province |
| Income                                       | <60K                   | 303 (46.3)        | 85.32 (84.57, 86.08)   |                  | 0.2488               | 0.2624    | 0.3759 | 0.0683        | 0.9648   |
|                                              | 60-100K                | 150 (22.9)        | 84.97 (84.04, 85.90)   |                  |                      |           |        |               |          |
|                                              | ≥100K                  | 121 (18.5)        | 85.98 (85.01, 86.95)   |                  |                      |           |        |               |          |
| Alcohol use                                  | Do not drink alcohol   | 167 (25.5)        | 85.56 (84.63, 86.50)   |                  | 0.3526               | 0.2463    | 0.7547 | 0.1842        | 0.9077   |
|                                              | ≤3 times/month         | 254 (38.8)        | 85.46 (84.70, 86.21)   |                  |                      |           |        |               |          |
|                                              | 1-3 times/week         | 149 (22.8)        | 85.06 (84.15, 85.97)   |                  |                      |           |        |               |          |
| Smoking status                               | ≥4 times/week          | 84 (12.8)         | 84.43 (83.15, 85.71)   |                  | 0.4469               | 0.2371    | 0.7579 | 0.1892        | 0.8691   |
|                                              | Current                | 136 (20.8)        | 84.97 (83.80, 86.15)   |                  |                      |           |        |               |          |
|                                              | former                 | 230 (35.2)        | 85.01 (84.24, 85.78)   |                  |                      |           |        |               |          |
| BMI group                                    | never                  | 288 (44.0)        | 85.66 (84.96, 86.35)   | A                | 0.0267               | 0.4340    | 0.7890 | 0.2066        | 0.7565   |
|                                              | <25 underweight-normal | 193 (30.9)        | 85.96 (85.18, 86.73)   |                  |                      |           |        |               |          |
|                                              | [25-30) overweight     | 232 (37.1)        | 85.02 (84.11, 85.93)   |                  |                      |           |        |               |          |
| Caffeine consumption                         | ≥30 obese              | 200 (32.0)        | 84.55 (83.71, 85.38)   | B                | 0.0255               | 0.2597    | 0.7644 | 0.1962        | 0.9016   |
|                                              | None                   | 81 (12.4)         | 85.67 (84.49, 86.86)   | AB               |                      |           |        |               |          |
|                                              | 1 or 2 cups/day        | 319 (48.8)        | 85.85 (85.15, 86.54)   | A                |                      |           |        |               |          |
|                                              | 3 or 4 cups/day        | 178 (27.2)        | 84.08 (83.06, 85.09)   | B                |                      |           |        |               |          |
| Self-reported sleep disturbance <sup>n</sup> | 5 or more cups/day     | 76 (11.6)         | 85.46 (84.45, 86.48)   | AB               | 0.8168               | 0.2358    | 0.7547 | 0.1817        | 0.9543   |
|                                              | High                   | 85 (13.0)         | 85.25 (84.07, 86.42)   |                  |                      |           |        |               |          |
| Sleep medication                             | Low                    | 568 (86.9)        | 85.28 (84.69, 85.86)   |                  | 0.2144               | 0.2467    | 0.7475 | 0.1856        | 0.8923   |
|                                              | Yes                    | 85 (13.0)         | 85.94 (84.55, 87.33)   |                  |                      |           |        |               |          |
| Type of dwelling                             | No                     | 569 (87.0)        | 85.15 (84.59, 85.72)   |                  | 0.8143               | 0.2341    | 0.7543 | 0.1865        | 0.9307   |
|                                              | Single detached homes  | 593 (90.7)        | 85.27 (84.68, 85.86)   |                  |                      |           |        |               |          |
| Property ownership                           | semi/duplex/apartment  | 61 (9.3)          | 85.26 (83.62, 86.91)   |                  | 0.4808               | 0.2697    | 0.7569 | 0.1853        | 0.8729   |
|                                              | Own                    | 568 (86.9)        | 85.36 (84.77, 85.94)   |                  |                      |           |        |               |          |
| Façade type                                  | rent                   | 86 (13.2)         | 84.82 (83.56, 86.08)   |                  | 0.9150               | 0.2416    | 0.7543 | 0.1868        | 0.9128   |
|                                              | Fully Bricked          | 188 (28.8)        | 85.35 (84.42, 86.27)   |                  |                      |           |        |               |          |
|                                              | Partially Bricked      | 102 (15.6)        | 84.99 (83.82, 86.17)   |                  |                      |           |        |               |          |
| Bedroom volume (1000ft <sup>3</sup> )        | No Brick/Other         | 364 (55.7)        | 85.33 (84.68, 85.97)   |                  | 0.9230               | 0.3428    | 0.8899 | 0.2230        | 0.6648   |
|                                              | b(SE)                  | 639 (97.7)        | 0.0004 (0.0040)        |                  |                      |           |        |               |          |

| Variable <sup>i</sup>                                             | Group                        | n(%) <sup>c</sup> | mean (CI) <sup>a</sup> | Sleep Efficiency |                      |           |        |               |          |
|-------------------------------------------------------------------|------------------------------|-------------------|------------------------|------------------|----------------------|-----------|--------|---------------|----------|
|                                                                   |                              |                   |                        | Pair wise tests  | p-value <sup>d</sup> |           |        |               |          |
|                                                                   |                              |                   |                        |                  | Variable             | Sound Bin | Day    | SoundBin *Day | Province |
| Bedroom location                                                  | Basement                     | 14 (2.1)          | 85.13 (82.34, 87.92)   | 0.4021           | 0.2439               | 0.7570    | 0.1857 | 0.9238        |          |
|                                                                   | First floor                  | 453 (69.3)        | 85.06 (84.38, 85.73)   |                  |                      |           |        |               |          |
|                                                                   | Second floor or higher       | 187 (28.6)        | 85.69 (84.89, 86.49)   |                  |                      |           |        |               |          |
| Closing bedroom window to block outside noise                     | Yes                          | 211 (32.3)        | 85.64 (84.92, 86.36)   | 0.2944           | 0.2366               | 0.7664    | 0.1799 | 0.8731        |          |
|                                                                   | No                           | 440 (67.3)        | 85.08 (84.42, 85.75)   |                  |                      |           |        |               |          |
| <b>Source identified as cause for closing window:<sup>L</sup></b> |                              |                   |                        |                  |                      |           |        |               |          |
| Road traffic                                                      | Yes                          | 95 (14.5)         | 85.77 (84.83, 86.72)   | 0.4403           | 0.2439               | 0.7799    | 0.1878 | 0.9343        |          |
|                                                                   | No                           | 555 (84.9)        | 85.18 (84.57, 85.79)   |                  |                      |           |        |               |          |
| Rail                                                              | Yes                          | 11 (1.7)          | 85.79 (83.48, 88.09)   | 0.8308           | 0.2466               | 0.7828    | 0.1892 | 0.9282        |          |
|                                                                   | No                           | 639 (97.7)        | 85.26 (84.69, 85.84)   |                  |                      |           |        |               |          |
| Wind turbines                                                     | Yes                          | 70 (10.7)         | 85.41 (84.11, 86.71)   | 0.7893           | 0.2500               | 0.7822    | 0.1881 | 0.9322        |          |
|                                                                   | No                           | 580 (88.7)        | 85.26 (84.68, 85.84)   |                  |                      |           |        |               |          |
| Other                                                             | Yes                          | 89 (13.6)         | 85.89 (84.91, 86.87)   | 0.1993           | 0.2641               | 0.7779    | 0.1891 | 0.9673        |          |
|                                                                   | No                           | 561 (85.8)        | 85.15 (84.54, 85.76)   |                  |                      |           |        |               |          |
| Sleep improved by closing window                                  | Yes                          | 169 (25.8)        | 85.74 (84.96, 86.52)   | 0.3884           | 0.2172               | 0.7499    | 0.1849 | 0.9016        |          |
|                                                                   | No                           | 39 (6.0)          | 85.26 (83.93, 86.59)   |                  |                      |           |        |               |          |
|                                                                   | Did not need to close window | 440 (67.3)        | 85.08 (84.41, 85.75)   |                  |                      |           |        |               |          |
| Bedroom window type                                               | Single pane                  | 57 (8.7)          | 85.22 (83.81, 86.62)   | 0.9502           | 0.2513               | 0.7547    | 0.1970 | 0.9457        |          |
|                                                                   | Double pane                  | 581 (88.8)        | 85.28 (84.68, 85.88)   |                  |                      |           |        |               |          |
|                                                                   | Triple pane                  | 15 (2.3)          | 85.29 (82.36, 88.21)   |                  |                      |           |        |               |          |
| Bedroom on quiet side                                             | Yes                          | 370 (56.6)        | 85.21 (84.51, 85.91)   | 0.8179           | 0.2305               | 0.7403    | 0.1932 | 0.9309        |          |
|                                                                   | No                           | 237 (36.2)        | 85.48 (84.72, 86.24)   |                  |                      |           |        |               |          |
|                                                                   | There is no quiet side       | 46 (7.0)          | 84.88 (83.07, 86.69)   |                  |                      |           |        |               |          |
| Air conditioner in dwelling                                       | Yes                          | 497 (76.0)        | 85.38 (84.52, 86.23)   | 0.7177           | 0.2434               | 0.7552    | 0.1851 | 0.7747        |          |
|                                                                   | No                           | 157 (24.0)        | 85.12 (84.24, 86.01)   |                  |                      |           |        |               |          |
| Air conditioning unit in bedroom                                  | Yes                          | 47 (7.2)          | 85.13 (83.08, 87.18)   | 0.9348           | 0.2500               | 0.7546    | 0.1868 | 0.7404        |          |
|                                                                   | No                           | 63 (9.6)          | 85.52 (84.11, 86.93)   |                  |                      |           |        |               |          |
|                                                                   | central AC or other          | 387 (59.2)        | 85.40 (84.55, 86.25)   |                  |                      |           |        |               |          |
|                                                                   | NO AC                        | 157 (24.0)        | 85.11 (84.23, 86.00)   |                  |                      |           |        |               |          |

| Variable <sup>i</sup>                      | Group                     | n(%) <sup>c</sup> | mean (CI) <sup>a</sup> | Sleep Efficiency |                      |           |        |               |
|--------------------------------------------|---------------------------|-------------------|------------------------|------------------|----------------------|-----------|--------|---------------|
|                                            |                           |                   |                        | Pair wise tests  | p-value <sup>d</sup> |           |        |               |
|                                            |                           |                   |                        |                  | Variable             | Sound Bin | Day    | SoundBin *Day |
| Any windows in the room in which you slept | Yes                       | 3258 <sup>j</sup> | 85.30 (84.68, 85.91)   | 0.2876           | 0.4986               | 0.5082    | 0.1360 | 0.8137        |
|                                            | No                        | 194 <sup>j</sup>  | 84.13 (82.54, 85.72)   |                  |                      |           |        |               |
| At least one window open                   | Yes                       | 1368 <sup>j</sup> | 85.32 (84.62, 86.02)   | 0.9178           | 0.4325               | 0.4220    | 0.1640 | 0.5720        |
|                                            | No                        | 1854 <sup>j</sup> | 85.24 (84.54, 85.94)   |                  |                      |           |        |               |
| Number of years hearing the WT             | Do not hear wind turbines | 331 (50.6)        | 85.40 (84.69, 86.11)   | 0.7222           | 0.2420               | 0.7600    | 0.1919 | 0.8390        |
|                                            | less than 1 year          | 30 (4.6)          | 84.60 (82.42, 86.78)   |                  |                      |           |        |               |
|                                            | 1 year or more            | 291 (44.5)        | 85.20 (84.36, 86.04)   |                  |                      |           |        |               |
| Complaint about WT                         | Yes                       | 26 (4.0)          | 87.13 (85.37, 88.88)   | 0.0627           | 0.2534               | 0.7580    | 0.2033 | 0.9836        |
|                                            | No                        | 625 (95.6)        | 85.22 (84.63, 85.80)   |                  |                      |           |        |               |
| Concerned about physical safety            | High                      | 41 (6.3)          | 84.72 (83.12, 86.33)   | 0.3698           | 0.2234               | 0.7399    | 0.1578 | 0.7821        |
|                                            | Low                       | 608 (93.0)        | 85.35 (84.77, 85.93)   |                  |                      |           |        |               |
| Personal benefits                          | Yes                       | 59 (9.0)          | 85.18 (83.46, 86.90)   | 0.9115           | 0.2038               | 0.7569    | 0.1183 | 0.9869        |
|                                            | No                        | 571 (87.3)        | 85.21 (84.61, 85.81)   |                  |                      |           |        |               |
| Audible wind turbines                      | Yes                       | 323 (49.4)        | 85.11 (84.27, 85.94)   | 0.5430           | 0.2219               | 0.7553    | 0.1860 | 0.8945        |
|                                            | No                        | 331 (50.6)        | 85.38 (84.67, 86.09)   |                  |                      |           |        |               |
| Audible road traffic                       | Yes                       | 546 (83.5)        | 85.25 (84.64, 85.85)   | 0.7180           | 0.2636               | 0.7551    | 0.1865 | 0.9110        |
|                                            | No                        | 108 (16.5)        | 85.38 (84.31, 86.46)   |                  |                      |           |        |               |
| Audible aircraft                           | Yes                       | 347 (53.1)        | 85.19 (84.47, 85.91)   | 0.7136           | 0.2570               | 0.7545    | 0.1866 | 0.9054        |
|                                            | No                        | 307 (46.9)        | 85.38 (84.68, 86.07)   |                  |                      |           |        |               |
| Audible rail                               | Yes                       | 120 (18.4)        | 84.74 (83.57, 85.92)   | 0.4541           | 0.2510               | 0.7533    | 0.1814 | 0.9144        |
|                                            | No                        | 534 (81.7)        | 85.37 (84.78, 85.96)   |                  |                      |           |        |               |
| ONT: audible rail                          | Yes                       | 120 (23.7)        | 85.33 (84.33, 86.33)   | 0.7218           | 0.2991               | 0.4384    | 0.2268 |               |
|                                            | No                        | 387 (76.3)        | 85.64 (85.06, 86.21)   |                  |                      |           |        |               |
| Annoyed by snoring                         | High                      | 33 (5.1)          | 84.87 (83.30, 86.44)   | 0.4565           | 0.2378               | 0.7550    | 0.1846 | 0.9270        |
|                                            | Low                       | 621 (95.0)        | 85.29 (84.71, 85.87)   |                  |                      |           |        |               |
| <b>Source of sleep disturbance</b>         |                           |                   |                        |                  |                      |           |        |               |
| Wind turbines                              | Yes                       | 37 (5.7)          | 85.49 (83.74, 87.23)   | 0.9282           | 0.2003               | 0.8044    | 0.1786 | 0.6219        |
|                                            | No                        | 594 (90.8)        | 85.36 (84.76, 85.95)   |                  |                      |           |        |               |

| Variable <sup>i</sup>             | Group | n(%) <sup>c</sup> | mean (CI) <sup>a</sup> | Sleep Efficiency |                      |           |        |               |
|-----------------------------------|-------|-------------------|------------------------|------------------|----------------------|-----------|--------|---------------|
|                                   |       |                   |                        | Pair wise tests  | p-value <sup>d</sup> |           |        |               |
|                                   |       |                   |                        |                  | Variable             | Sound Bin | Day    | SoundBin *Day |
| Children                          | Yes   | 45 (6.9)          | 86.16 (84.64, 87.68)   | 0.2576           | 0.2062               | 0.8053    | 0.1787 | 0.6580        |
|                                   | No    | 586 (89.6)        | 85.28 (84.68, 85.88)   |                  |                      |           |        |               |
| Pets                              | Yes   | 47 (7.2)          | 85.81 (84.23, 87.40)   | 0.4256           | 0.2318               | 0.7992    | 0.1787 | 0.5846        |
|                                   | No    | 584 (89.3)        | 85.33 (84.73, 85.93)   |                  |                      |           |        |               |
| Neighbours                        | Yes   | 20 (3.1)          | 86.52 (84.18, 88.86)   | 0.2636           | 0.1969               | 0.8059    | 0.1806 | 0.5646        |
|                                   | No    | 611 (93.4)        | 85.33 (84.73, 85.92)   |                  |                      |           |        |               |
| Stress/anxiety                    | Yes   | 35 (5.4)          | 85.90 (83.82, 87.99)   | 0.4950           | 0.1935               | 0.8043    | 0.1806 | 0.6180        |
|                                   | No    | 596 (91.1)        | 85.33 (84.74, 85.92)   |                  |                      |           |        |               |
| Health related/physical pain      | Yes   | 84 (12.8)         | 84.97 (83.62, 86.33)   | 0.4303           | 0.2258               | 0.8056    | 0.1794 | 0.6477        |
|                                   | No    | 547 (83.6)        | 85.42 (84.83, 86.01)   |                  |                      |           |        |               |
| Snoring                           | Yes   | 32 (4.9)          | 85.44 (83.69, 87.20)   | 0.9714           | 0.2011               | 0.8045    | 0.1785 | 0.6266        |
|                                   | No    | 599 (91.6)        | 85.36 (84.76, 85.95)   |                  |                      |           |        |               |
| Other                             | Yes   | 312 (47.7)        | 85.21 (84.41, 86.01)   | 0.4121           | 0.2267               | 0.8058    | 0.1779 | 0.6841        |
|                                   | No    | 319 (48.8)        | 85.49 (84.82, 86.15)   |                  |                      |           |        |               |
| Sensitivity to noise              | High  | 99 (15.1)         | 85.65 (84.58, 86.73)   | 0.5232           | 0.2422               | 0.7669    | 0.1823 | 0.8426        |
|                                   | Low   | 552 (84.4)        | 85.23 (84.64, 85.83)   |                  |                      |           |        |               |
| Annoyance to WTN                  | High  | 42 (6.4)          | 86.02 (84.34, 87.71)   | 0.2881           | 0.2482               | 0.7614    | 0.1948 | 0.7605        |
|                                   | Low   | 611 (93.4)        | 85.28 (84.71, 85.86)   |                  |                      |           |        |               |
| Annoyance with blinking lights    | High  | 59 (9.0)          | 84.85 (83.29, 86.42)   | 0.5697           | 0.2464               | 0.7630    | 0.1937 | 0.8745        |
|                                   | Low   | 594 (90.8)        | 85.33 (84.76, 85.90)   |                  |                      |           |        |               |
| Shadow flicker annoyance          | High  | 44 (6.7)          | 84.86 (83.24, 86.49)   | 0.5847           | 0.2409               | 0.7582    | 0.1923 | 0.8406        |
|                                   | Low   | 608 (93.0)        | 85.33 (84.75, 85.91)   |                  |                      |           |        |               |
| Notice vibrations                 | Yes   | 32 (4.9)          | 85.82 (84.00, 87.64)   | 0.5500           | 0.2859               | 0.7059    | 0.2246 | 0.8560        |
|                                   | No    | 616 (94.2)        | 85.27 (84.69, 85.85)   |                  |                      |           |        |               |
| Annoyance with vibrations/rattles | High  | 9 (1.4)           | 86.20 (83.93, 88.48)   | 0.5252           | 0.2828               | 0.7082    | 0.2243 | 0.8437        |
|                                   | Low   | 639 (97.7)        | 85.29 (84.71, 85.86)   |                  |                      |           |        |               |
| Migraines                         | Yes   | 171 (26.2)        | 85.16 (84.13, 86.18)   | 0.7365           | 0.2434               | 0.7575    | 0.1859 | 0.9431        |
|                                   | No    | 483 (73.9)        | 85.31 (84.72, 85.89)   |                  |                      |           |        |               |
| Dizziness                         | Yes   | 163 (24.9)        | 85.82 (84.90, 86.74)   | 0.1164           | 0.1887               | 0.7528    | 0.1855 | 0.8930        |
|                                   | No    | 491 (75.1)        | 85.10 (84.49, 85.71)   |                  |                      |           |        |               |

| Variable <sup>i</sup>                 | Group | n(%) <sup>c</sup> | mean (CI) <sup>a</sup> | Sleep Efficiency |                      |           |        |               |
|---------------------------------------|-------|-------------------|------------------------|------------------|----------------------|-----------|--------|---------------|
|                                       |       |                   |                        | Pair wise tests  | p-value <sup>d</sup> |           |        |               |
|                                       |       |                   |                        |                  | Variable             | Sound Bin | Day    | SoundBin *Day |
| Tinnitus                              | Yes   | 163 (24.9)        | 85.22 (84.24, 86.20)   | 0.8025           | 0.2622               | 0.7391    | 0.1877 | 0.9183        |
|                                       | No    | 490 (74.9)        | 85.29 (84.68, 85.91)   |                  |                      |           |        |               |
| Chronic Pain                          | Yes   | 175 (26.8)        | 84.92 (83.93, 85.91)   | 0.4364           | 0.2561               | 0.7616    | 0.1947 | 0.9849        |
|                                       | No    | 478 (73.1)        | 85.38 (84.78, 85.98)   |                  |                      |           |        |               |
| Asthma                                | Yes   | 59 (9.0)          | 85.20 (83.35, 87.05)   | 0.9862           | 0.2485               | 0.7549    | 0.1862 | 0.9243        |
|                                       | No    | 595 (91.0)        | 85.28 (84.71, 85.85)   |                  |                      |           |        |               |
| Arthritis                             | Yes   | 225 (34.4)        | 85.24 (84.40, 86.08)   | 0.8654           | 0.2416               | 0.7547    | 0.1862 | 0.9292        |
|                                       | No    | 429 (65.6)        | 85.29 (84.66, 85.93)   |                  |                      |           |        |               |
| Chronic bronchitis/<br>emphysema/COPD | Yes   | 46 (7.0)          | 84.70 (82.47, 86.94)   | 0.7615           | 0.3010               | 0.7834    | 0.1880 | 0.9329        |
|                                       | No    | 607 (92.8)        | 85.29 (84.74, 85.84)   |                  |                      |           |        |               |
| Diabetes                              | Yes   | 70 (10.7)         | 83.64 (81.91, 85.37)   | 0.0570           | 0.2156               | 0.7476    | 0.1914 | 0.7775        |
|                                       | No    | 584 (89.3)        | 85.51 (84.98, 86.05)   |                  |                      |           |        |               |
| Heart disease                         | Yes   | 54 (8.3)          | 84.95 (83.13, 86.77)   | 0.7963           | 0.2469               | 0.7547    | 0.1871 | 0.9245        |
|                                       | No    | 600 (91.7)        | 85.31 (84.74, 85.87)   |                  |                      |           |        |               |
| Diagnosed sleep disorder              | Yes   | 64 (9.8)          | 84.72 (82.81, 86.62)   | 0.7049           | 0.2502               | 0.7559    | 0.1869 | 0.9635        |
|                                       | No    | 590 (90.2)        | 85.33 (84.77, 85.89)   |                  |                      |           |        |               |
| Restless leg syndrome                 | Yes   | 98 (15.0)         | 84.50 (83.09, 85.91)   | 0.3326           | 0.2411               | 0.7556    | 0.1884 | 0.9493        |
|                                       | No    | 556 (85.0)        | 85.39 (84.83, 85.95)   |                  |                      |           |        |               |

<sup>a</sup> Least square means based on original scale of data and corresponding 95% confidence interval (CI), linear mixed effects model

<sup>d</sup> p-values for the different factors in the mixed effect model based on arcsin(sqrt(x)) for sleep efficiency

<sup>c</sup> observed frequency and proportion of respondents in each subgroup of variable. The % does not always sum to 100 due to missing values

<sup>i</sup> pregnancy status was also considered, but analysis was not conducted due to the small number of pregnant women who participated in the sleep actimetry component of the study (n<5)

<sup>j</sup> based on the number of sleep nights, because people could have slept in a different room on a particular night, or window was open on only certain nights

| Variable <sup>i</sup> | Group | n(%) <sup>c</sup> | mean (CI) <sup>a</sup> | Sleep Efficiency |                      |     |          |      |
|-----------------------|-------|-------------------|------------------------|------------------|----------------------|-----|----------|------|
|                       |       |                   |                        | Pair wise tests  | p-value <sup>d</sup> |     | SoundBin |      |
|                       |       |                   |                        |                  | Variable             | Bin | Day      | *Day |

<sup>L</sup> Aircraft noise leading to closure of bedroom window was also considered, but analysis was not conducted due to the small number of these responses (n<5)

<sup>M</sup> Unemployment includes stay at home parents, retired, as well as not currently employed

<sup>n</sup> Evaluates the magnitude of reported sleep disturbance for any reason over the previous year while at home

Repeated-measures data from all wrist actigraphy measurements were modeled using the generalized estimating equations (GEE) method. Each of the listed variable represents a separate univariate GEE regression model for the modeled actigraphy endpoint explained by that variable and adjusted for WTN levels, province, day of the week, and the interaction between WTN groups and day of the week. It should be emphasized that variables considered in the univariate analysis have been previously demonstrated to be related to the modeled endpoint and/or considered by the authors to conceptually have a potential association with the modeled endpoint. As the analysis of each listed variable only adjusts for WTN category and province, interpretation of any individual relationship must be made with caution. The wrist actigraphy endpoint of number of awakening bouts does not follow a normal distribution; therefore to analyze awakening bouts a Poisson distribution was assumed. The number of awakening bouts was analyzed with respect to the total time spent in bed and is reported as a rate of the number of awakening bouts per 60 min in bed. Sleep efficiency, sleep latency, and WASO were transformed in order to normalize the data and stabilize the variance. In the GEE models, statistical tests were based on transformed data. Because back-transformation was not possible for some endpoints, the arithmetic mean (least squares mean [LSM]) is presented for all endpoints.

**Supplementary Table II: The influence of personal and situational variables on actigraphy measures**

| Variable <sup>i</sup>             | Group                               | n(%) <sup>c</sup> | mean (CI) <sup>a</sup> | Wake after Sleep Onset |                      |        |               |          |        |
|-----------------------------------|-------------------------------------|-------------------|------------------------|------------------------|----------------------|--------|---------------|----------|--------|
|                                   |                                     |                   |                        | Pair wise tests        | p-value <sup>e</sup> |        |               |          |        |
|                                   |                                     |                   |                        | Variable               | Sound Bin            | Day    | SoundBin *Day | Province |        |
| WTN levels                        | <25dBA                              | 46 (7.0)          | 58.83 (52.78, 64.87)   |                        | 0.0655               | 0.2452 | 0.4975        | 0.9058   |        |
|                                   | [25-30)dBA                          | 48 (7.3)          | 49.11 (43.72, 54.50)   |                        |                      |        |               |          |        |
|                                   | [30-35)dBA                          | 164 (25.1)        | 55.39 (52.04, 58.74)   |                        |                      |        |               |          |        |
|                                   | [35-40)dBA                          | 272 (41.6)        | 53.08 (50.35, 55.80)   |                        |                      |        |               |          |        |
|                                   | [40-46]dBA                          | 124 (19.0)        | 55.46 (51.45, 59.47)   |                        |                      |        |               |          |        |
| Background nighttime sound (BNTS) | <40 dBA                             | 159 (24.3)        | 50.65 (46.94, 54.36)   | A                      | 0.0059               | 0.0409 | 0.2376        | 0.4926   | 0.2421 |
|                                   | [40, 50) dBA                        | 224 (34.3)        | 52.83 (49.46, 56.21)   | AB                     |                      |        |               |          |        |
|                                   | [50, 55) dBA                        | 237 (36.2)        | 57.97 (54.72, 61.21)   | BC                     |                      |        |               |          |        |
|                                   | >=55 dBA                            | 34 (5.2)          | 67.23 (57.00, 77.46)   | C                      |                      |        |               |          |        |
| Sex                               | Male                                | 289 (44.2)        | 55.12 (52.16, 58.09)   |                        | 0.5077               | 0.0649 | 0.2436        | 0.4959   | 0.9396 |
|                                   | Female                              | 365 (55.8)        | 53.83 (51.23, 56.42)   |                        |                      |        |               |          |        |
| Age group                         | ≤24                                 | 32 (4.9)          | 55.43 (47.27, 63.59)   |                        | 0.2749               | 0.0451 | 0.2418        | 0.5036   | 0.9989 |
|                                   | 25-44                               | 148 (22.6)        | 51.48 (47.78, 55.18)   |                        |                      |        |               |          |        |
|                                   | 45-64                               | 302 (46.2)        | 54.63 (51.86, 57.40)   |                        |                      |        |               |          |        |
|                                   | 65+                                 | 172 (26.3)        | 56.39 (52.83, 59.96)   |                        |                      |        |               |          |        |
| Marital Status                    | Married/Common-law                  | 451 (69.0)        | 53.81 (51.31, 56.30)   |                        | 0.8811               | 0.0708 | 0.2452        | 0.5001   | 0.9350 |
|                                   | Widowed/Separated/Divorced          | 125 (19.1)        | 56.59 (52.05, 61.14)   |                        |                      |        |               |          |        |
|                                   | Single, never been married          | 78 (11.9)         | 54.13 (49.85, 58.41)   |                        |                      |        |               |          |        |
| Employment                        | Yes                                 | 327 (50.0)        | 51.53 (48.94, 54.12)   | A                      | 0.0100               | 0.0540 | 0.2333        | 0.5038   | 0.8954 |
|                                   | No                                  | 327 (50.0)        | 56.93 (54.09, 59.78)   | B                      |                      |        |               |          |        |
| Employment Schedule               | regular daytime/evening shift       | 307 (46.9)        | 51.32 (48.72, 53.92)   | A                      | 0.0344               | 0.0515 | 0.2341        | 0.5043   | 0.8937 |
|                                   | Split shift/on call or casual/other | 20 (3.1)          | 54.28 (44.29, 64.26)   | AB                     |                      |        |               |          |        |
|                                   | Unemployed <sup>M</sup>             | 327 (50.0)        | 56.91 (54.08, 59.75)   | B                      |                      |        |               |          |        |
| Level of Education                | ≤High School                        | 355 (54.3)        | 57.03 (54.30, 59.75)   | A                      | 0.0063               | 0.0540 | 0.2343        | 0.4870   | 0.8369 |
|                                   | Trade/Certificate/College           | 240 (36.7)        | 51.36 (48.25, 54.48)   | B                      |                      |        |               |          |        |
|                                   | University                          | 59 (9.0)          | 50.85 (46.73, 54.96)   | AB                     |                      |        |               |          |        |

| Variable <sup>i</sup>                        | Group                  | n(%) <sup>c</sup> | mean (CI) <sup>a</sup> | Wake after Sleep Onset |                      |           |        |               |          |
|----------------------------------------------|------------------------|-------------------|------------------------|------------------------|----------------------|-----------|--------|---------------|----------|
|                                              |                        |                   |                        | Pair wise tests        | p-value <sup>e</sup> |           |        |               |          |
|                                              |                        |                   |                        |                        | Variable             | Sound Bin | Day    | SoundBin *Day | Province |
| Income                                       | <60K                   | 303 (46.3)        | 55.19 (52.49, 57.89)   | 0.6238                 | 0.1800               | 0.0942    | 0.7804 | 0.8121        |          |
|                                              | 60-100K                | 150 (22.9)        | 53.28 (49.76, 56.80)   |                        |                      |           |        |               |          |
|                                              | ≥100K                  | 121 (18.5)        | 52.14 (47.86, 56.41)   |                        |                      |           |        |               |          |
| Alcohol use                                  | Do not drink alcohol   | 167 (25.5)        | 53.64 (50.06, 57.23)   | 0.2472                 | 0.0614               | 0.2439    | 0.5030 | 0.8957        |          |
|                                              | ≤3 times/month         | 254 (38.8)        | 53.36 (50.25, 56.46)   |                        |                      |           |        |               |          |
|                                              | 1-3 times/week         | 149 (22.8)        | 55.57 (51.97, 59.17)   |                        |                      |           |        |               |          |
|                                              | ≥4 times/week          | 84 (12.8)         | 57.04 (52.36, 61.72)   |                        |                      |           |        |               |          |
| Smoking status                               | Current                | 136 (20.8)        | 51.92 (48.04, 55.80)   | A                      | 0.0232               | 0.0581    | 0.2446 | 0.5087        | 0.8659   |
|                                              | former                 | 230 (35.2)        | 57.03 (53.97, 60.09)   | B                      |                      |           |        |               |          |
|                                              | never                  | 288 (44.0)        | 53.26 (50.22, 56.31)   | AB                     |                      |           |        |               |          |
| BMI group                                    | <25 underweight-normal | 193 (30.9)        | 53.40 (50.26, 56.54)   | 0.4367                 | 0.1128               | 0.4564    | 0.3610 | 0.9993        |          |
|                                              | [25-30) overweight     | 232 (37.1)        | 53.51 (50.30, 56.71)   |                        |                      |           |        |               |          |
|                                              | ≥30 obese              | 200 (32.0)        | 56.40 (52.81, 59.99)   |                        |                      |           |        |               |          |
| Caffeine consumption                         | None                   | 81 (12.4)         | 53.60 (49.08, 58.13)   | 0.2813                 | 0.0724               | 0.2442    | 0.5011 | 0.9171        |          |
|                                              | 1 or 2 cups/day        | 319 (48.8)        | 53.37 (50.39, 56.36)   |                        |                      |           |        |               |          |
|                                              | 3 or 4 cups/day        | 178 (27.2)        | 57.05 (53.53, 60.58)   |                        |                      |           |        |               |          |
|                                              | 5 or more cups/day     | 76 (11.6)         | 52.86 (48.70, 57.02)   |                        |                      |           |        |               |          |
| Self-reported sleep disturbance <sup>n</sup> | High                   | 85 (13.0)         | 53.18 (48.61, 57.74)   | 0.6744                 | 0.0656               | 0.2492    | 0.4911 | 0.9048        |          |
|                                              | Low                    | 568 (86.9)        | 54.51 (52.23, 56.80)   |                        |                      |           |        |               |          |
| Sleep medication                             | Yes                    | 85 (13.0)         | 50.92 (45.82, 56.01)   | 0.1056                 | 0.0599               | 0.2373    | 0.4988 | 0.8705        |          |
|                                              | No                     | 569 (87.0)        | 54.99 (52.70, 57.28)   |                        |                      |           |        |               |          |
| Type of dwelling                             | Single detached homes  | 593 (90.7)        | 54.06 (51.67, 56.46)   | 0.7394                 | 0.0849               | 0.2458    | 0.4971 | 0.8967        |          |
|                                              | semi/duplex/apartment  | 61 (9.3)          | 56.49 (51.30, 61.69)   |                        |                      |           |        |               |          |
| Property ownership                           | Own                    | 568 (86.9)        | 53.84 (51.41, 56.27)   | 0.3007                 | 0.0803               | 0.2474    | 0.4951 | 0.8295        |          |
|                                              | rent                   | 86 (13.2)         | 57.25 (52.62, 61.88)   |                        |                      |           |        |               |          |
| Façade type                                  | Fully Bricked          | 188 (28.8)        | 54.18 (50.28, 58.08)   | 0.9344                 | 0.0725               | 0.2450    | 0.5017 | 0.8964        |          |
|                                              | Partially Bricked      | 102 (15.6)        | 54.97 (50.39, 59.56)   |                        |                      |           |        |               |          |
|                                              | No Brick/Other         | 364 (55.7)        | 54.27 (51.74, 56.80)   |                        |                      |           |        |               |          |
| Bedroom volume (1000ft <sup>3</sup> )        | b(SE)                  | 639 (97.7)        | -0.0481 (0.0880)       | 0.5930                 | 0.1042               | 0.2361    | 0.5882 | 0.9281        |          |

| Variable <sup>i</sup>                                             | Group                        | n(%) <sup>c</sup> | mean (CI) <sup>a</sup> | Wake after Sleep Onset |                      |           |        |               |          |
|-------------------------------------------------------------------|------------------------------|-------------------|------------------------|------------------------|----------------------|-----------|--------|---------------|----------|
|                                                                   |                              |                   |                        | Pair wise tests        | p-value <sup>e</sup> |           |        |               |          |
|                                                                   |                              |                   |                        |                        | Variable             | Sound Bin | Day    | SoundBin *Day | Province |
| Bedroom location                                                  | Basement                     | 14 (2.1)          | 71.43 (58.14, 84.72)   | A                      | 0.0285               | 0.0696    | 0.2422 | 0.4952        | 0.8960   |
|                                                                   | First floor                  | 453 (69.3)        | 55.01 (52.49, 57.53)   | AB                     |                      |           |        |               |          |
|                                                                   | Second floor or higher       | 187 (28.6)        | 52.14 (49.01, 55.28)   | B                      |                      |           |        |               |          |
| Closing bedroom window to block outside noise                     | Yes                          | 211 (32.3)        | 53.46 (50.48, 56.44)   |                        | 0.6381               | 0.0579    | 0.2544 | 0.5162        | 0.8743   |
|                                                                   | No                           | 440 (67.3)        | 54.83 (52.26, 57.40)   |                        |                      |           |        |               |          |
| <b>Source identified as cause for closing window:<sup>L</sup></b> |                              |                   |                        |                        |                      |           |        |               |          |
| Road traffic                                                      | Yes                          | 95 (14.5)         | 53.25 (48.80, 57.70)   |                        | 0.6943               | 0.0598    | 0.2618 | 0.5012        | 0.8966   |
|                                                                   | No                           | 555 (84.9)        | 54.58 (52.23, 56.92)   |                        |                      |           |        |               |          |
| Rail                                                              | Yes                          | 11 (1.7)          | 60.85 (49.97, 71.73)   |                        | 0.1882               | 0.0797    | 0.2627 | 0.4963        | 0.9701   |
|                                                                   | No                           | 639 (97.7)        | 54.25 (52.03, 56.46)   |                        |                      |           |        |               |          |
| Wind turbines                                                     | Yes                          | 70 (10.7)         | 50.89 (45.83, 55.95)   |                        | 0.2140               | 0.0611    | 0.2644 | 0.5027        | 0.8802   |
|                                                                   | No                           | 580 (88.7)        | 54.64 (52.39, 56.89)   |                        |                      |           |        |               |          |
| Other                                                             | Yes                          | 89 (13.6)         | 53.73 (49.75, 57.70)   |                        | 0.8916               | 0.0615    | 0.2632 | 0.5025        | 0.9019   |
|                                                                   | No                           | 561 (85.8)        | 54.49 (52.14, 56.85)   |                        |                      |           |        |               |          |
| Sleep improved by closing window                                  | Yes                          | 169 (25.8)        | 52.39 (49.13, 55.65)   |                        | 0.1385               | 0.0435    | 0.2540 | 0.5263        | 0.9465   |
|                                                                   | No                           | 39 (6.0)          | 57.54 (51.84, 63.24)   |                        |                      |           |        |               |          |
|                                                                   | Did not need to close window | 440 (67.3)        | 54.88 (52.31, 57.44)   |                        |                      |           |        |               |          |
| Bedroom window type                                               | Single pane                  | 57 (8.7)          | 57.60 (51.55, 63.65)   |                        | 0.2688               | 0.0659    | 0.2377 | 0.4600        | 0.7600   |
|                                                                   | Double pane                  | 581 (88.8)        | 54.16 (51.96, 56.36)   |                        |                      |           |        |               |          |
|                                                                   | Triple pane                  | 15 (2.3)          | 44.68 (33.19, 56.18)   |                        |                      |           |        |               |          |
| Bedroom on quiet side                                             | Yes                          | 370 (56.6)        | 53.86 (51.29, 56.43)   |                        | 0.3574               | 0.0809    | 0.2417 | 0.4846        | 0.8497   |
|                                                                   | No                           | 237 (36.2)        | 54.38 (51.23, 57.53)   |                        |                      |           |        |               |          |
|                                                                   | There is no quiet side       | 46 (7.0)          | 58.32 (52.15, 64.48)   |                        |                      |           |        |               |          |
| Air conditioner in dwelling                                       | Yes                          | 497 (76.0)        | 54.56 (51.54, 57.58)   |                        | 0.7235               | 0.0654    | 0.2453 | 0.4976        | 0.8922   |
|                                                                   | No                           | 157 (24.0)        | 54.10 (50.66, 57.55)   |                        |                      |           |        |               |          |
| Air conditioning unit in bedroom                                  | Yes                          | 47 (7.2)          | 53.31 (48.03, 58.60)   |                        | 0.9718               | 0.0640    | 0.2447 | 0.4981        | 0.8477   |
|                                                                   | No                           | 63 (9.6)          | 55.70 (49.38, 62.03)   |                        |                      |           |        |               |          |
|                                                                   | central AC or other          | 387 (59.2)        | 54.60 (51.40, 57.80)   |                        |                      |           |        |               |          |
|                                                                   | NO AC                        | 157 (24.0)        | 54.06 (50.60, 57.52)   |                        |                      |           |        |               |          |

| Variable <sup>i</sup>                      | Group                     | n(%) <sup>c</sup> | mean (CI) <sup>a</sup> | Wake after Sleep Onset |                      |           |        |                     |
|--------------------------------------------|---------------------------|-------------------|------------------------|------------------------|----------------------|-----------|--------|---------------------|
|                                            |                           |                   |                        | Pair wise tests        | p-value <sup>e</sup> |           |        |                     |
|                                            |                           |                   |                        |                        | Variable             | Sound Bin | Day    | SoundBin *Day       |
| Any windows in the room in which you slept | Yes                       | 3258 <sup>j</sup> | 54.30 (52.10, 56.50)   | 0.7226                 | 0.3249               | 0.3864    | 0.7028 | 0.9819              |
|                                            | No                        | 194 <sup>j</sup>  | 53.90 (47.92, 59.87)   |                        |                      |           |        |                     |
| At least one window open                   | Yes                       | 1368 <sup>j</sup> | 54.69 (52.24, 57.15)   | 0.6052                 | 0.0141               | 0.4067    | 0.8061 | 0.1901 <sup>k</sup> |
|                                            | No                        | 1854 <sup>j</sup> | 54.15 (51.95, 56.35)   |                        |                      |           |        |                     |
| Number of years hearing the WT             | Do not hear wind turbines | 331 (50.6)        | 55.30 (52.55, 58.04)   | 0.4796                 | 0.0771               | 0.2456    | 0.5112 | 0.7864              |
|                                            | less than 1 year          | 30 (4.6)          | 54.27 (46.66, 61.88)   |                        |                      |           |        |                     |
|                                            | 1 year or more            | 291 (44.5)        | 52.05 (48.81, 55.30)   |                        |                      |           |        |                     |
| Complaint about WT                         | Yes                       | 26 (4.0)          | 49.92 (42.00, 57.84)   | 0.3096                 | 0.0807               | 0.2389    | 0.5231 | 0.8852              |
|                                            | No                        | 625 (95.6)        | 54.37 (52.16, 56.57)   |                        |                      |           |        |                     |
| Concerned about physical safety            | High                      | 41 (6.3)          | 53.20 (46.94, 59.45)   | 0.8351                 | 0.0723               | 0.2304    | 0.4756 | 0.8564              |
|                                            | Low                       | 608 (93.0)        | 54.34 (52.15, 56.53)   |                        |                      |           |        |                     |
| Personal benefits                          | Yes                       | 59 (9.0)          | 52.70 (47.44, 57.97)   | 0.7148                 | 0.0502               | 0.2697    | 0.3794 | 0.8586              |
|                                            | No                        | 571 (87.3)        | 54.70 (52.37, 57.03)   |                        |                      |           |        |                     |
| Audible wind turbines                      | Yes                       | 323 (49.4)        | 52.63 (49.35, 55.90)   | 0.3480                 | 0.0639               | 0.2461    | 0.4962 | 0.9579              |
|                                            | No                        | 331 (50.6)        | 55.49 (52.72, 58.26)   |                        |                      |           |        |                     |
| Audible road traffic                       | Yes                       | 546 (83.5)        | 53.83 (51.56, 56.10)   | 0.2793                 | 0.0560               | 0.2430    | 0.4954 | 0.9546              |
|                                            | No                        | 108 (16.5)        | 56.70 (51.98, 61.43)   |                        |                      |           |        |                     |
| Audible aircraft                           | Yes                       | 347 (53.1)        | 52.86 (50.22, 55.51)   | 0.0885                 | 0.0477               | 0.2447    | 0.4933 | 0.9900              |
|                                            | No                        | 307 (46.9)        | 56.19 (53.30, 59.08)   |                        |                      |           |        |                     |
| Audible rail                               | Yes                       | 120 (18.4)        | 54.21 (49.73, 58.69)   | 0.6912                 | 0.0633               | 0.2454    | 0.5001 | 0.8227              |
|                                            | No                        | 534 (81.7)        | 54.40 (52.09, 56.72)   |                        |                      |           |        |                     |
| ONT: audible rail                          | Yes                       | 120 (23.7)        | 53.68 (49.74, 57.62)   | 0.6280                 | 0.2821               | 0.4305    | 0.8716 |                     |
|                                            | No                        | 387 (76.3)        | 54.10 (51.61, 56.60)   |                        |                      |           |        |                     |
| Annoyed by snoring                         | High                      | 33 (5.1)          | 55.93 (48.80, 63.06)   | 0.5452                 | 0.0632               | 0.2440    | 0.4962 | 0.9077              |
|                                            | Low                       | 621 (95.0)        | 54.30 (52.06, 56.54)   |                        |                      |           |        |                     |
| <b>Source of sleep disturbance</b>         |                           |                   |                        |                        |                      |           |        |                     |
| Wind turbines                              | Yes                       | 37 (5.7)          | 49.30 (42.83, 55.77)   | 0.2358                 | 0.0647               | 0.2752    | 0.6099 | 0.6022              |
|                                            | No                        | 594 (90.8)        | 54.14 (52.00, 56.28)   |                        |                      |           |        |                     |

| Variable <sup>i</sup>             | Group | n(%) <sup>c</sup> | mean (CI) <sup>a</sup> | Wake after Sleep Onset |                      |           |        |               |
|-----------------------------------|-------|-------------------|------------------------|------------------------|----------------------|-----------|--------|---------------|
|                                   |       |                   |                        | Pair wise tests        | p-value <sup>e</sup> |           |        |               |
|                                   |       |                   |                        |                        | Variable             | Sound Bin | Day    | SoundBin *Day |
| Children                          | Yes   | 45 (6.9)          | 50.75 (45.49, 56.01)   | 0.2492                 | 0.0549               | 0.2778    | 0.6024 | 0.7076        |
|                                   | No    | 586 (89.6)        | 54.31 (52.12, 56.50)   |                        |                      |           |        |               |
| Pets                              | Yes   | 47 (7.2)          | 53.24 (46.98, 59.49)   | 0.8135                 | 0.0660               | 0.2747    | 0.6076 | 0.6655        |
|                                   | No    | 584 (89.3)        | 54.05 (51.87, 56.23)   |                        |                      |           |        |               |
| Neighbours                        | Yes   | 20 (3.1)          | 54.62 (42.66, 66.58)   | 0.7857                 | 0.0621               | 0.2752    | 0.6075 | 0.6564        |
|                                   | No    | 611 (93.4)        | 53.98 (51.81, 56.14)   |                        |                      |           |        |               |
| Stress/anxiety                    | Yes   | 35 (5.4)          | 55.65 (48.28, 63.01)   | 0.7000                 | 0.0653               | 0.2756    | 0.6106 | 0.6804        |
|                                   | No    | 596 (91.1)        | 53.90 (51.77, 56.04)   |                        |                      |           |        |               |
| Health related/physical pain      | Yes   | 84 (12.8)         | 53.45 (49.18, 57.72)   | 0.9868                 | 0.0633               | 0.2754    | 0.6083 | 0.6777        |
|                                   | No    | 547 (83.6)        | 54.08 (51.82, 56.33)   |                        |                      |           |        |               |
| Snoring                           | Yes   | 32 (4.9)          | 51.75 (45.50, 58.00)   | 0.7015                 | 0.0623               | 0.2756    | 0.6091 | 0.6766        |
|                                   | No    | 599 (91.6)        | 54.12 (51.94, 56.30)   |                        |                      |           |        |               |
| Other                             | Yes   | 312 (47.7)        | 53.85 (51.08, 56.61)   | 0.9431                 | 0.0625               | 0.2756    | 0.6081 | 0.6862        |
|                                   | No    | 319 (48.8)        | 54.12 (51.43, 56.81)   |                        |                      |           |        |               |
| Sensitivity to noise              | High  | 99 (15.1)         | 54.73 (50.20, 59.26)   | 0.8238                 | 0.0753               | 0.2190    | 0.5522 | 0.8089        |
|                                   | Low   | 552 (84.4)        | 54.15 (51.84, 56.46)   |                        |                      |           |        |               |
| Annoyance to WTN                  | High  | 42 (6.4)          | 50.49 (43.71, 57.27)   | 0.2191                 | 0.0777               | 0.2456    | 0.5180 | 0.6578        |
|                                   | Low   | 611 (93.4)        | 54.24 (52.07, 56.42)   |                        |                      |           |        |               |
| Annoyance with blinking lights    | High  | 59 (9.0)          | 52.51 (46.17, 58.85)   | 0.4857                 | 0.0737               | 0.2436    | 0.5162 | 0.6569        |
|                                   | Low   | 594 (90.8)        | 54.20 (52.03, 56.37)   |                        |                      |           |        |               |
| Shadow flicker annoyance          | High  | 44 (6.7)          | 53.81 (46.67, 60.94)   | 0.8288                 | 0.0739               | 0.2387    | 0.5262 | 0.7261        |
|                                   | Low   | 608 (93.0)        | 54.14 (51.96, 56.31)   |                        |                      |           |        |               |
| Notice vibrations                 | Yes   | 32 (4.9)          | 51.15 (44.06, 58.23)   | 0.4491                 | 0.0814               | 0.1925    | 0.5152 | 0.7700        |
|                                   | No    | 616 (94.2)        | 54.31 (52.11, 56.51)   |                        |                      |           |        |               |
| Annoyance with vibrations/rattles | High  | 9 (1.4)           | 49.53 (43.75, 55.32)   | 0.4001                 | 0.0793               | 0.1928    | 0.5138 | 0.7580        |
|                                   | Low   | 639 (97.7)        | 54.22 (52.04, 56.39)   |                        |                      |           |        |               |
| Migraines                         | Yes   | 171 (26.2)        | 52.83 (49.36, 56.31)   | 0.2666                 | 0.0625               | 0.2399    | 0.4944 | 0.8431        |
|                                   | No    | 483 (73.9)        | 54.83 (52.41, 57.25)   |                        |                      |           |        |               |
| Dizziness                         | Yes   | 163 (24.9)        | 53.13 (49.64, 56.61)   | 0.2933                 | 0.0553               | 0.2433    | 0.4942 | 0.8860        |
|                                   | No    | 491 (75.1)        | 54.77 (52.32, 57.21)   |                        |                      |           |        |               |

| Variable <sup>i</sup>                 | Group | n(%) <sup>c</sup> | mean (CI) <sup>a</sup> | Wake after Sleep Onset |                      |           |        |               |
|---------------------------------------|-------|-------------------|------------------------|------------------------|----------------------|-----------|--------|---------------|
|                                       |       |                   |                        | Pair wise tests        | p-value <sup>e</sup> |           |        |               |
|                                       |       |                   |                        |                        | Variable             | Sound Bin | Day    | SoundBin *Day |
| Tinnitus                              | Yes   | 163 (24.9)        | 53.91 (50.44, 57.38)   | 0.8717                 | 0.0695               | 0.2332    | 0.4976 | 0.9187        |
|                                       | No    | 490 (74.9)        | 54.53 (52.05, 57.01)   |                        |                      |           |        |               |
| Chronic Pain                          | Yes   | 175 (26.8)        | 56.05 (52.30, 59.81)   | 0.4316                 | 0.0713               | 0.2433    | 0.4964 | 0.9409        |
|                                       | No    | 478 (73.1)        | 53.81 (51.46, 56.17)   |                        |                      |           |        |               |
| Asthma                                | Yes   | 59 (9.0)          | 55.03 (48.63, 61.42)   | 0.9916                 | 0.0650               | 0.2453    | 0.4979 | 0.9061        |
|                                       | No    | 595 (91.0)        | 54.30 (52.03, 56.57)   |                        |                      |           |        |               |
| Arthritis                             | Yes   | 225 (34.4)        | 55.20 (52.04, 58.36)   | 0.4329                 | 0.0610               | 0.2442    | 0.4989 | 0.9303        |
|                                       | No    | 429 (65.6)        | 53.95 (51.44, 56.47)   |                        |                      |           |        |               |
| Chronic bronchitis/<br>emphysema/COPD | Yes   | 46 (7.0)          | 55.75 (48.64, 62.86)   | 0.7539                 | 0.0908               | 0.2333    | 0.5370 | 0.9002        |
|                                       | No    | 607 (92.8)        | 54.40 (52.15, 56.66)   |                        |                      |           |        |               |
| Diabetes                              | Yes   | 70 (10.7)         | 59.21 (54.32, 64.10)   | 0.1053                 | 0.0584               | 0.2394    | 0.4950 | 0.8051        |
|                                       | No    | 584 (89.3)        | 53.66 (51.37, 55.95)   |                        |                      |           |        |               |
| Heart disease                         | Yes   | 54 (8.3)          | 56.22 (50.68, 61.77)   | 0.7217                 | 0.0664               | 0.2453    | 0.4971 | 0.9075        |
|                                       | No    | 600 (91.7)        | 54.18 (51.89, 56.47)   |                        |                      |           |        |               |
| Diagnosed sleep disorder              | Yes   | 64 (9.8)          | 51.20 (44.76, 57.65)   | 0.1667                 | 0.0533               | 0.2444    | 0.5008 | 0.7761        |
|                                       | No    | 590 (90.2)        | 54.73 (52.41, 57.04)   |                        |                      |           |        |               |
| Restless leg syndrome                 | Yes   | 98 (15.0)         | 54.04 (49.67, 58.40)   | 0.7889                 | 0.0659               | 0.2447    | 0.4979 | 0.8980        |
|                                       | No    | 556 (85.0)        | 54.42 (52.08, 56.77)   |                        |                      |           |        |               |

<sup>a</sup> Least square means based on original scale of data and corresponding 95% confidence interval (CI), linear mixed effects model

<sup>c</sup> observed frequency and proportion of respondents in each subgroup of variable. The % does not always sum to 100 due to missing values

<sup>i</sup> pregnancy status was also considered, but analysis was not conducted due to the small number of pregnant women who participated in the sleep actimetry component of the study (n<5)

<sup>j</sup> based on the number of sleep nights, because people could have slept in a different room on a particular night, or window was open on only certain nights

<sup>e</sup> p-values for the different factors in the mixed effect model based on sqrt(x) for wake after sleep onset

<sup>k</sup> the interaction between WTN and province was significant in this model (p=0.0176), specifically, the difference between WTN was found only in PEI (p=0.0099) with WTN <25 having higher WASO periods than WTN categories [25, 30), [30, 35) and [35, 40)dBA; no differences found in ON (p=0.2696).

| Variable <sup>i</sup> | Group | n(%) <sup>c</sup> | mean (CI) <sup>a</sup> | Wake after Sleep Onset |                      |              |     |                  |
|-----------------------|-------|-------------------|------------------------|------------------------|----------------------|--------------|-----|------------------|
|                       |       |                   |                        | Pair<br>wise<br>tests  | p-value <sup>e</sup> |              |     |                  |
|                       |       |                   |                        |                        | Variable             | Sound<br>Bin | Day | SoundBin<br>*Day |

<sup>L</sup> Aircraft noise leading to closure of bedroom window was also considered, but analysis was not conducted due to the small number of these responses (n<5)

<sup>M</sup> Unemployment includes stay at home parents, retired, as well as not currently employed

<sup>n</sup> Evaluates the magnitude of reported sleep disturbance for any reason over the previous year while at home

Repeated-measures data from all wrist actigraphy measurements were modeled using the generalized estimating equations (GEE) method. Each of the listed variable represents a separate univariate GEE regression model for the modeled actigraphy endpoint explained by that variable and adjusted for WTN levels, province, day of the week, and the interaction between WTN groups and day of the week. It should be emphasized that variables considered in the univariate analysis have been previously demonstrated to be related to the modeled endpoint and/or considered by the authors to conceptually have a potential association with the modeled endpoint. As the analysis of each listed variable only adjusts for WTN category and province, interpretation of any individual relationship must be made with caution. The wrist actigraphy endpoint of number of awakening bouts does not follow a normal distribution; therefore to analyze awakening bouts a Poisson distribution was assumed. The number of awakening bouts was analyzed with respect to the total time spent in bed and is reported as a rate of the number of awakening bouts per 60 min in bed. Sleep efficiency, sleep latency, and WASO were transformed in order to normalize the data and stabilize the variance. In the GEE models, statistical tests were based on transformed data. Because back-transformation was not possible for some endpoints, the arithmetic mean (least squares mean [LSM]) is presented for all endpoints.

**Supplementary Table II: The influence of personal and situational variables on actigraphy measures**

| Variable <sup>i</sup>             | Group                               | n(%) <sup>c</sup> | mean (CI) <sup>a</sup> | Pair wise tests | Awakening Bouts during sleep |                      |        |          |          |
|-----------------------------------|-------------------------------------|-------------------|------------------------|-----------------|------------------------------|----------------------|--------|----------|----------|
|                                   |                                     |                   |                        |                 | rate(CI) <sup>f</sup>        | p-value <sup>g</sup> |        | Province |          |
|                                   |                                     |                   |                        |                 | Variable                     | Sound Bin            | Day    | *Day     | Province |
| WTN levels                        | <25dBA                              | 46 (7.0)          | 24.26 (22.28, 26.25)   |                 |                              | 0.2460               | 0.7033 | 0.9128   | 0.6150   |
|                                   | [25-30]dBA                          | 48 (7.3)          | 21.08 (19.14, 23.02)   |                 |                              |                      |        |          |          |
|                                   | [30-35]dBA                          | 164 (25.1)        | 24.57 (23.01, 26.14)   |                 |                              |                      |        |          |          |
|                                   | [35-40]dBA                          | 272 (41.6)        | 23.37 (22.40, 24.35)   |                 |                              |                      |        |          |          |
|                                   | [40-46]dBA                          | 124 (19.0)        | 23.84 (22.55, 25.13)   |                 |                              |                      |        |          |          |
| Background nighttime sound (BNTS) | <40 dBA                             | 159 (24.3)        | 21.80 (20.49, 23.11)   |                 | 0.7851                       | 0.3031               | 0.7441 | 0.8985   | 0.8184   |
|                                   | [40, 50] dBA                        | 224 (34.3)        | 23.41 (22.20, 24.62)   |                 |                              |                      |        |          |          |
|                                   | [50, 55] dBA                        | 237 (36.2)        | 24.56 (23.40, 25.71)   |                 |                              |                      |        |          |          |
|                                   | >=55 dBA                            | 34 (5.2)          | 27.92 (23.32, 32.52)   |                 |                              |                      |        |          |          |
| Sex                               | Male                                | 289 (44.2)        | 24.00 (22.88, 25.11)   |                 | 0.7307                       | 0.2424               | 0.6965 | 0.9170   | 0.6170   |
|                                   | Female                              | 365 (55.8)        | 23.02 (22.13, 23.90)   |                 |                              |                      |        |          |          |
| Age group                         | ≤24                                 | 32 (4.9)          | 25.70 (22.39, 29.02)   |                 | 0.8718                       | 0.2490               | 0.7210 | 0.9120   | 0.6044   |
|                                   | 25-44                               | 148 (22.6)        | 23.95 (22.57, 25.33)   |                 |                              |                      |        |          |          |
|                                   | 45-64                               | 302 (46.2)        | 23.42 (22.42, 24.43)   |                 |                              |                      |        |          |          |
|                                   | 65+                                 | 172 (26.3)        | 22.67 (21.46, 23.87)   |                 |                              |                      |        |          |          |
| Marital Status                    | Married/Common-law                  | 451 (69.0)        | 23.61 (22.71, 24.51)   |                 | 0.0854                       | 0.2680               | 0.7177 | 0.9191   | 0.7030   |
|                                   | Widowed/Separated/Divorced          | 125 (19.1)        | 22.12 (20.69, 23.55)   |                 |                              |                      |        |          |          |
|                                   | Single, never been married          | 78 (11.9)         | 24.45 (22.71, 26.19)   |                 |                              |                      |        |          |          |
| Employment                        | Yes                                 | 327 (50.0)        | 23.73 (22.75, 24.70)   |                 | 0.8191                       | 0.2447               | 0.7054 | 0.9130   | 0.6145   |
|                                   | No                                  | 327 (50.0)        | 23.15 (22.17, 24.13)   |                 |                              |                      |        |          |          |
| Employment Schedule               | regular daytime/evening shift       | 307 (46.9)        | 23.81 (22.79, 24.82)   |                 | 0.9734                       | 0.2471               | 0.7057 | 0.9142   | 0.6115   |
|                                   | Split shift/on call or casual/other | 20 (3.1)          | 22.69 (20.66, 24.71)   |                 |                              |                      |        |          |          |
|                                   | Unemployed <sup>M</sup>             | 327 (50.0)        | 23.15 (22.17, 24.13)   |                 |                              |                      |        |          |          |
| Level of Education                | ≤High School                        | 355 (54.3)        | 23.96 (23.00, 24.93)   |                 | 0.6203                       | 0.2382               | 0.7167 | 0.9130   | 0.6316   |
|                                   | Trade/Certificate/College           | 240 (36.7)        | 22.64 (21.57, 23.71)   |                 |                              |                      |        |          |          |
|                                   | University                          | 59 (9.0)          | 23.35 (21.30, 25.40)   |                 |                              |                      |        |          |          |

| Variable <sup>i</sup>                        | Group                  | n(%) <sup>c</sup> | mean (CI) <sup>a</sup> | Pair wise tests   | Awakening Bouts during sleep |                      |           |        |               |
|----------------------------------------------|------------------------|-------------------|------------------------|-------------------|------------------------------|----------------------|-----------|--------|---------------|
|                                              |                        |                   |                        |                   | rate(CI) <sup>f</sup>        | p-value <sup>g</sup> |           |        |               |
|                                              |                        |                   |                        |                   |                              | Variable             | Sound Bin | Day    | SoundBin *Day |
| Income                                       | <60K                   | 303 (46.3)        | 22.79 (21.82, 23.76)   | 2.26 (2.11, 2.42) | 0.3865                       | 0.2554               | 0.4558    | 0.6796 | 0.7483        |
|                                              | 60-100K                | 150 (22.9)        | 23.63 (22.36, 24.90)   | 2.41 (2.21, 2.62) |                              |                      |           |        |               |
|                                              | ≥100K                  | 121 (18.5)        | 24.31 (22.77, 25.86)   | 2.39 (2.16, 2.65) |                              |                      |           |        |               |
| Alcohol use                                  | Do not drink alcohol   | 167 (25.5)        | 22.22 (21.01, 23.43)   | 2.22 (2.03, 2.43) | 0.3632                       | 0.2193               | 0.7205    | 0.9150 | 0.4770        |
|                                              | ≤3 times/month         | 254 (38.8)        | 23.68 (22.51, 24.85)   | 2.38 (2.21, 2.55) |                              |                      |           |        |               |
|                                              | 1-3 times/week         | 149 (22.8)        | 24.08 (22.79, 25.37)   | 2.36 (2.16, 2.59) |                              |                      |           |        |               |
|                                              | ≥4 times/week          | 84 (12.8)         | 24.15 (22.49, 25.81)   | 2.50 (2.24, 2.78) |                              |                      |           |        |               |
| Smoking status                               | Current                | 136 (20.8)        | 21.51 (20.22, 22.79)   | 2.14 (1.93, 2.37) | 0.0919                       | 0.3006               | 0.7084    | 0.9154 | 0.6029        |
|                                              | former                 | 230 (35.2)        | 24.23 (23.08, 25.38)   | 2.40 (2.23, 2.59) |                              |                      |           |        |               |
|                                              | never                  | 288 (44.0)        | 23.71 (22.64, 24.78)   | 2.41 (2.26, 2.57) |                              |                      |           |        |               |
| BMI group                                    | <25 underweight-normal | 193 (30.9)        | 23.53 (22.33, 24.72)   | 2.29 (2.10, 2.50) | 0.5608                       | 0.2504               | 0.6396    | 0.8313 | 0.2604        |
|                                              | [25-30) overweight     | 232 (37.1)        | 23.94 (22.76, 25.11)   | 2.42 (2.24, 2.60) |                              |                      |           |        |               |
|                                              | ≥30 obese              | 200 (32.0)        | 23.59 (22.31, 24.88)   | 2.38 (2.20, 2.57) |                              |                      |           |        |               |
| Caffeine consumption                         | None                   | 81 (12.4)         | 22.19 (20.55, 23.83)   | 2.18 (1.94, 2.44) | 0.1109                       | 0.2481               | 0.7247    | 0.9090 | 0.4809        |
|                                              | 1 or 2 cups/day        | 319 (48.8)        | 23.85 (22.79, 24.92)   | 2.38 (2.22, 2.54) |                              |                      |           |        |               |
|                                              | 3 or 4 cups/day        | 178 (27.2)        | 24.01 (22.67, 25.35)   | 2.46 (2.26, 2.68) |                              |                      |           |        |               |
|                                              | 5 or more cups/day     | 76 (11.6)         | 21.91 (20.46, 23.36)   | 2.15 (1.93, 2.40) |                              |                      |           |        |               |
| Self-reported sleep disturbance <sup>n</sup> | High                   | 85 (13.0)         | 22.64 (20.98, 24.30)   | 2.30 (2.07, 2.57) | 0.7373                       | 0.2484               | 0.7089    | 0.9157 | 0.6119        |
|                                              | Low                    | 568 (86.9)        | 23.52 (22.73, 24.32)   | 2.35 (2.23, 2.48) |                              |                      |           |        |               |
| Sleep medication                             | Yes                    | 85 (13.0)         | 22.01 (20.28, 23.74)   | 2.30 (2.08, 2.54) | 0.6355                       | 0.2526               | 0.7050    | 0.9127 | 0.6219        |
|                                              | No                     | 569 (87.0)        | 23.68 (22.89, 24.47)   | 2.36 (2.23, 2.49) |                              |                      |           |        |               |
| Type of dwelling                             | Single detached homes  | 593 (90.7)        | 23.60 (22.76, 24.44)   | 2.39 (2.26, 2.52) | 0.1815                       | 0.2768               | 0.6803    | 0.9214 | 0.5698        |
|                                              | semi/duplex/apartment  | 61 (9.3)          | 22.27 (20.48, 24.07)   | 2.18 (1.93, 2.45) |                              |                      |           |        |               |
| Property ownership                           | Own                    | 568 (86.9)        | 23.41 (22.56, 24.26)   | 2.36 (2.23, 2.50) | 0.6398                       | 0.2303               | 0.6961    | 0.9162 | 0.5851        |
|                                              | rent                   | 86 (13.2)         | 23.51 (21.84, 25.17)   | 2.29 (2.05, 2.56) |                              |                      |           |        |               |
| Façade type                                  | Fully Bricked          | 188 (28.8)        | 23.33 (21.96, 24.70)   | 2.39 (2.18, 2.61) | 0.8706                       | 0.2335               | 0.7065    | 0.9186 | 0.5000        |
|                                              | Partially Bricked      | 102 (15.6)        | 23.88 (21.89, 25.88)   | 2.36 (2.08, 2.67) |                              |                      |           |        |               |
|                                              | No Brick/Other         | 364 (55.7)        | 23.33 (22.46, 24.20)   | 2.33 (2.20, 2.47) |                              |                      |           |        |               |
| Bedroom volume (1000ft <sup>3</sup> )        | b(SE)                  | 639 (97.7)        | 0.0256 (0.0250)        |                   | 0.3257                       | 0.1795               | 0.7476    | 0.8795 | 0.6072        |

| Variable <sup>i</sup>                                             | Group                        | n(%) <sup>c</sup> | mean (CI) <sup>a</sup> | Pair wise tests   | Awakening Bouts during sleep |                      |           |        |               |
|-------------------------------------------------------------------|------------------------------|-------------------|------------------------|-------------------|------------------------------|----------------------|-----------|--------|---------------|
|                                                                   |                              |                   |                        |                   | rate(CI) <sup>f</sup>        | p-value <sup>g</sup> |           |        |               |
|                                                                   |                              |                   |                        |                   |                              | Variable             | Sound Bin | Day    | SoundBin *Day |
| Bedroom location                                                  | Basement                     | 14 (2.1)          | 31.81 (21.86, 41.76)   | 3.32 (2.27, 4.85) | 0.3753                       | 0.2367               | 0.7681    | 0.8660 | 0.6053        |
|                                                                   | First floor                  | 453 (69.3)        | 23.39 (22.49, 24.29)   | 2.38 (2.24, 2.51) |                              |                      |           |        |               |
|                                                                   | Second floor or higher       | 187 (28.6)        | 23.00 (21.92, 24.09)   | 2.35 (2.18, 2.53) |                              |                      |           |        |               |
| Closing bedroom window to block outside noise                     | Yes                          | 211 (32.3)        | 23.28 (22.16, 24.40)   | 2.34 (2.18, 2.51) | 0.7322                       | 0.2616               | 0.7180    | 0.9250 | 0.6565        |
|                                                                   | No                           | 440 (67.3)        | 23.53 (22.65, 24.41)   | 2.37 (2.24, 2.51) |                              |                      |           |        |               |
| <b>Source identified as cause for closing window:<sup>L</sup></b> |                              |                   |                        |                   |                              |                      |           |        |               |
| Road traffic                                                      | Yes                          | 95 (14.5)         | 23.54 (21.87, 25.21)   | 2.36 (2.14, 2.60) | 0.9858                       | 0.2488               | 0.7154    | 0.9247 | 0.6355        |
|                                                                   | No                           | 555 (84.9)        | 23.43 (22.62, 24.24)   | 2.36 (2.23, 2.48) |                              |                      |           |        |               |
| Rail                                                              | Yes                          | 11 (1.7)          | 26.68 (23.07, 30.30)   | 2.38 (1.96, 2.88) | 0.9200                       | 0.2518               | 0.7151    | 0.9240 | 0.6340        |
|                                                                   | No                           | 639 (97.7)        | 23.38 (22.62, 24.15)   | 2.36 (2.24, 2.48) |                              |                      |           |        |               |
| Wind turbines                                                     | Yes                          | 70 (10.7)         | 22.97 (21.02, 24.92)   | 2.48 (2.20, 2.80) | 0.3702                       | 0.2557               | 0.7198    | 0.9259 | 0.6372        |
|                                                                   | No                           | 580 (88.7)        | 23.48 (22.71, 24.25)   | 2.35 (2.23, 2.47) |                              |                      |           |        |               |
| Other                                                             | Yes                          | 89 (13.6)         | 23.18 (21.77, 24.59)   | 2.23 (2.01, 2.47) | 0.2240                       | 0.2467               | 0.7109    | 0.9273 | 0.5900        |
|                                                                   | No                           | 561 (85.8)        | 23.50 (22.68, 24.32)   | 2.39 (2.26, 2.52) |                              |                      |           |        |               |
| Sleep improved by closing window                                  | Yes                          | 169 (25.8)        | 22.94 (21.71, 24.18)   | 2.29 (2.12, 2.48) | 0.2358                       | 0.2395               | 0.7232    | 0.9240 | 0.6480        |
|                                                                   | No                           | 39 (6.0)          | 24.91 (22.69, 27.14)   | 2.59 (2.29, 2.94) |                              |                      |           |        |               |
|                                                                   | Did not need to close window | 440 (67.3)        | 23.53 (22.65, 24.41)   | 2.37 (2.24, 2.51) |                              |                      |           |        |               |
| Bedroom window type                                               | Single pane                  | 57 (8.7)          | 23.04 (20.99, 25.09)   | 2.20 (1.91, 2.54) | 0.5837                       | 0.2581               | 0.7065    | 0.9188 | 0.4947        |
|                                                                   | Double pane                  | 581 (88.8)        | 23.54 (22.75, 24.33)   | 2.37 (2.24, 2.50) |                              |                      |           |        |               |
|                                                                   | Triple pane                  | 15 (2.3)          | 20.63 (15.64, 25.63)   | 2.20 (1.62, 2.98) |                              |                      |           |        |               |
| Bedroom on quiet side                                             | Yes                          | 370 (56.6)        | 23.07 (22.15, 23.99)   | 2.36 (2.22, 2.52) | 0.8174                       | 0.2282               | 0.7028    | 0.9077 | 0.6102        |
|                                                                   | No                           | 237 (36.2)        | 23.64 (22.53, 24.75)   | 2.30 (2.14, 2.48) |                              |                      |           |        |               |
|                                                                   | There is no quiet side       | 46 (7.0)          | 25.20 (22.91, 27.48)   | 2.37 (2.06, 2.71) |                              |                      |           |        |               |
| Air conditioner in dwelling                                       | Yes                          | 497 (76.0)        | 23.78 (22.62, 24.95)   | 2.35 (2.19, 2.53) | 0.9310                       | 0.2467               | 0.7045    | 0.9135 | 0.6539        |
|                                                                   | No                           | 157 (24.0)        | 22.92 (21.70, 24.14)   | 2.34 (2.15, 2.55) |                              |                      |           |        |               |
| Air conditioning unit in bedroom                                  | Yes                          | 47 (7.2)          | 23.01 (20.92, 25.09)   | 2.52 (2.21, 2.87) | 0.2776                       | 0.2919               | 0.6643    | 0.9240 | 0.6845        |
|                                                                   | No                           | 63 (9.6)          | 22.89 (20.67, 25.10)   | 2.09 (1.78, 2.44) |                              |                      |           |        |               |
|                                                                   | central AC or other          | 387 (59.2)        | 24.16 (22.89, 25.43)   | 2.38 (2.20, 2.59) |                              |                      |           |        |               |
|                                                                   | NO AC                        | 157 (24.0)        | 22.89 (21.66, 24.11)   | 2.35 (2.16, 2.56) |                              |                      |           |        |               |

| Variable <sup>i</sup>                      | Group                     | n(%) <sup>c</sup> | Awakening Bouts during sleep |                 |                       |                      |           |        |               |          |
|--------------------------------------------|---------------------------|-------------------|------------------------------|-----------------|-----------------------|----------------------|-----------|--------|---------------|----------|
|                                            |                           |                   | mean (CI) <sup>a</sup>       | Pair wise tests | rate(CI) <sup>f</sup> | p-value <sup>g</sup> |           |        |               |          |
|                                            |                           |                   |                              |                 |                       | Variable             | Sound Bin | Day    | SoundBin *Day | Province |
| Any windows in the room in which you slept | Yes                       | 3258 <sup>j</sup> | 23.59 (22.79, 24.39)         |                 | 2.34 (2.21, 2.48)     | 0.6383               | 0.2951    | 0.3653 | 0.9299        | 0.6977   |
|                                            | No                        | 194 <sup>j</sup>  | 23.64 (21.61, 25.66)         |                 | 2.39 (2.15, 2.66)     |                      |           |        |               |          |
| At least one window open                   | Yes                       | 1368 <sup>j</sup> | 23.33 (22.38, 24.27)         |                 | 2.36 (2.22, 2.51)     | 0.7916               | 0.2963    | 0.5517 | 0.8923        | 0.6089   |
|                                            | No                        | 1854 <sup>j</sup> | 23.70 (22.78, 24.62)         |                 | 2.38 (2.24, 2.53)     |                      |           |        |               |          |
| Number of years hearing the WT             | Do not hear wind turbines | 331 (50.6)        | 23.90 (22.94, 24.86)         |                 | 2.35 (2.21, 2.50)     | 0.2492               | 0.2135    | 0.6955 | 0.9171        | 0.7110   |
|                                            | less than 1 year          | 30 (4.6)          | 25.05 (22.05, 28.06)         |                 | 2.73 (2.26, 3.29)     |                      |           |        |               |          |
|                                            | 1 year or more            | 291 (44.5)        | 22.22 (21.05, 23.39)         |                 | 2.29 (2.12, 2.48)     |                      |           |        |               |          |
| Complaint about WT                         | Yes                       | 26 (4.0)          | 22.56 (19.14, 25.99)         |                 | 2.35 (1.98, 2.78)     | 0.9743               | 0.2031    | 0.7004 | 0.9214        | 0.6756   |
|                                            | No                        | 625 (95.6)        | 23.42 (22.65, 24.19)         |                 | 2.34 (2.22, 2.47)     |                      |           |        |               |          |
| Concerned about physical safety            | High                      | 41 (6.3)          | 22.21 (19.80, 24.62)         |                 | 2.53 (2.24, 2.84)     | 0.2014               | 0.2153    | 0.7039 | 0.9098        | 0.6931   |
|                                            | Low                       | 608 (93.0)        | 23.48 (22.71, 24.24)         |                 | 2.33 (2.20, 2.45)     |                      |           |        |               |          |
| Personal benefits                          | Yes                       | 59 (9.0)          | 23.19 (21.22, 25.16)         |                 | 2.20 (1.88, 2.57)     | 0.3361               | 0.2437    | 0.8024 | 0.9081        | 0.4909   |
|                                            | No                        | 571 (87.3)        | 23.52 (22.71, 24.33)         |                 | 2.38 (2.25, 2.51)     |                      |           |        |               |          |
| Audible wind turbines                      | Yes                       | 323 (49.4)        | 22.62 (21.46, 23.78)         |                 | 2.35 (2.17, 2.53)     | 0.9420               | 0.2457    | 0.7029 | 0.9137        | 0.6069   |
|                                            | No                        | 331 (50.6)        | 23.94 (22.98, 24.90)         |                 | 2.35 (2.21, 2.50)     |                      |           |        |               |          |
| Audible road traffic                       | Yes                       | 546 (83.5)        | 23.27 (22.46, 24.07)         |                 | 2.36 (2.24, 2.50)     | 0.5015               | 0.2888    | 0.6962 | 0.9161        | 0.6468   |
|                                            | No                        | 108 (16.5)        | 24.10 (22.46, 25.73)         |                 | 2.28 (2.06, 2.52)     |                      |           |        |               |          |
| Audible aircraft                           | Yes                       | 347 (53.1)        | 22.93 (21.96, 23.90)         |                 | 2.39 (2.24, 2.54)     | 0.4069               | 0.2550    | 0.6991 | 0.9080        | 0.6537   |
|                                            | No                        | 307 (46.9)        | 24.01 (23.00, 25.02)         |                 | 2.30 (2.15, 2.47)     |                      |           |        |               |          |
| Audible rail                               | Yes                       | 120 (18.4)        | 23.82 (21.90, 25.74)         |                 | 2.41 (2.14, 2.70)     | 0.6889               | 0.2476    | 0.7143 | 0.9083        | 0.5439   |
|                                            | No                        | 534 (81.7)        | 23.35 (22.56, 24.15)         |                 | 2.35 (2.23, 2.47)     |                      |           |        |               |          |
| ONT: audible rail                          | Yes                       | 120 (23.7)        | 23.38 (21.75, 25.00)         |                 | 2.33 (2.10, 2.59)     | 0.7637               | 0.1202    | 0.5770 | 0.3993        |          |
|                                            | No                        | 387 (76.3)        | 23.23 (22.31, 24.15)         |                 | 2.29 (2.14, 2.45)     |                      |           |        |               |          |
| Annoyed by snoring                         | High                      | 33 (5.1)          | 26.02 (21.54, 30.50)         |                 | 2.57 (2.06, 3.22)     | 0.4681               | 0.2710    | 0.7331 | 0.9032        | 0.6198   |
|                                            | Low                       | 621 (95.0)        | 23.31 (22.55, 24.08)         |                 | 2.36 (2.24, 2.48)     |                      |           |        |               |          |
| <b>Source of sleep disturbance</b>         |                           |                   |                              |                 |                       |                      |           |        |               |          |
| Wind turbines                              | Yes                       | 37 (5.7)          | 23.13 (20.47, 25.80)         |                 | 2.51 (2.15, 2.94)     | 0.2681               | 0.3162    | 0.7711 | 0.8897        | 0.9626   |
|                                            | No                        | 594 (90.8)        | 23.32 (22.56, 24.09)         |                 | 2.29 (2.17, 2.42)     |                      |           |        |               |          |

| Variable <sup>i</sup>             | Group | n(%) <sup>c</sup> | Awakening Bouts during sleep |                 |                       |                      |           |        |               |          |
|-----------------------------------|-------|-------------------|------------------------------|-----------------|-----------------------|----------------------|-----------|--------|---------------|----------|
|                                   |       |                   | mean (CI) <sup>a</sup>       | Pair wise tests | rate(CI) <sup>f</sup> | p-value <sup>g</sup> |           |        |               |          |
|                                   |       |                   |                              |                 |                       | Variable             | Sound Bin | Day    | SoundBin *Day | Province |
| Children                          | Yes   | 45 (6.9)          | 23.84 (22.02, 25.65)         |                 | 2.22 (1.90, 2.59)     | 0.6175               | 0.3319    | 0.7570 | 0.8875        | 0.9327   |
|                                   | No    | 586 (89.6)        | 23.27 (22.47, 24.06)         |                 | 2.31 (2.18, 2.45)     |                      |           |        |               |          |
| Pets                              | Yes   | 47 (7.2)          | 23.55 (21.23, 25.87)         |                 | 2.24 (1.85, 2.72)     | 0.7584               | 0.3316    | 0.7552 | 0.8874        | 0.9049   |
|                                   | No    | 584 (89.3)        | 23.30 (22.53, 24.06)         |                 | 2.31 (2.18, 2.44)     |                      |           |        |               |          |
| Neighbours                        | Yes   | 20 (3.1)          | 23.15 (18.91, 27.39)         |                 | 1.90 (1.51, 2.38)     | 0.0999               | 0.3242    | 0.7392 | 0.8806        | 0.8149   |
|                                   | No    | 611 (93.4)        | 23.32 (22.55, 24.09)         |                 | 2.32 (2.20, 2.45)     |                      |           |        |               |          |
| Stress/anxiety                    | Yes   | 35 (5.4)          | 23.08 (20.21, 25.96)         |                 | 2.21 (1.81, 2.71)     | 0.6866               | 0.2993    | 0.7554 | 0.8937        | 0.9124   |
|                                   | No    | 596 (91.1)        | 23.33 (22.56, 24.10)         |                 | 2.30 (2.18, 2.44)     |                      |           |        |               |          |
| Health related/physical pain      | Yes   | 84 (12.8)         | 23.32 (21.32, 25.32)         |                 | 2.60 (2.32, 2.92)     | 0.0554               | 0.3441    | 0.7493 | 0.8860        | 0.9537   |
|                                   | No    | 547 (83.6)        | 23.32 (22.51, 24.12)         |                 | 2.29 (2.17, 2.42)     |                      |           |        |               |          |
| Snoring                           | Yes   | 32 (4.9)          | 23.43 (21.50, 25.36)         |                 | 2.38 (2.10, 2.69)     | 0.5851               | 0.3042    | 0.7581 | 0.8867        | 0.9250   |
|                                   | No    | 599 (91.6)        | 23.31 (22.53, 24.09)         |                 | 2.29 (2.17, 2.43)     |                      |           |        |               |          |
| Other                             | Yes   | 312 (47.7)        | 22.98 (21.97, 24.00)         |                 | 2.38 (2.22, 2.54)     | 0.2414               | 0.3755    | 0.7439 | 0.8839        | 0.9855   |
|                                   | No    | 319 (48.8)        | 23.59 (22.61, 24.57)         |                 | 2.26 (2.11, 2.42)     |                      |           |        |               |          |
| Sensitivity to noise              | High  | 99 (15.1)         | 23.17 (21.49, 24.85)         |                 | 2.36 (2.12, 2.63)     | 0.8446               | 0.2270    | 0.6999 | 0.9078        | 0.5852   |
|                                   | Low   | 552 (84.4)        | 23.46 (22.66, 24.27)         |                 | 2.34 (2.21, 2.47)     |                      |           |        |               |          |
| Annoyance to WTN                  | High  | 42 (6.4)          | 21.19 (18.57, 23.82)         |                 | 2.35 (1.99, 2.77)     | 0.9913               | 0.2159    | 0.6999 | 0.9204        | 0.6998   |
|                                   | Low   | 611 (93.4)        | 23.44 (22.69, 24.20)         |                 | 2.35 (2.23, 2.47)     |                      |           |        |               |          |
| Annoyance with blinking lights    | High  | 59 (9.0)          | 23.61 (20.52, 26.69)         | A               | 2.84 (2.42, 3.34)     | 0.0309               | 0.2566    | 0.7576 | 0.8964        | 0.5180   |
|                                   | Low   | 594 (90.8)        | 23.36 (22.61, 24.11)         | B               | 2.35 (2.23, 2.47)     |                      |           |        |               |          |
| Shadow flicker annoyance          | High  | 44 (6.7)          | 24.25 (20.46, 28.03)         |                 | 2.81 (2.35, 3.37)     | 0.0786               | 0.2330    | 0.7586 | 0.8948        | 0.6866   |
|                                   | Low   | 608 (93.0)        | 23.32 (22.57, 24.08)         |                 | 2.35 (2.23, 2.47)     |                      |           |        |               |          |
| Notice vibrations                 | Yes   | 32 (4.9)          | 22.45 (19.99, 24.90)         |                 | 2.29 (1.88, 2.80)     | 0.8576               | 0.2098    | 0.7699 | 0.8582        | 0.6812   |
|                                   | No    | 616 (94.2)        | 23.44 (22.68, 24.20)         |                 | 2.33 (2.21, 2.46)     |                      |           |        |               |          |
| Annoyance with vibrations/rattles | High  | 9 (1.4)           | 21.36 (18.07, 24.64)         |                 | 2.37 (1.99, 2.81)     | 0.8642               | 0.2079    | 0.7708 | 0.8611        | 0.6826   |
|                                   | Low   | 639 (97.7)        | 23.42 (22.66, 24.17)         |                 | 2.33 (2.21, 2.46)     |                      |           |        |               |          |
| Migraines                         | Yes   | 171 (26.2)        | 22.57 (21.31, 23.84)         |                 | 2.44 (2.24, 2.65)     | 0.2529               | 0.2651    | 0.6969 | 0.9164        | 0.5522   |
|                                   | No    | 483 (73.9)        | 23.68 (22.84, 24.51)         |                 | 2.32 (2.19, 2.45)     |                      |           |        |               |          |
| Dizziness                         | Yes   | 163 (24.9)        | 22.28 (21.07, 23.48)         |                 | 2.29 (2.13, 2.47)     | 0.4436               | 0.2410    | 0.7112 | 0.9103        | 0.6369   |
|                                   | No    | 491 (75.1)        | 23.79 (22.93, 24.65)         |                 | 2.37 (2.24, 2.51)     |                      |           |        |               |          |

| Variable <sup>i</sup>                 | Group | n(%) <sup>c</sup> | mean (CI) <sup>a</sup> | Pair wise tests | Awakening Bouts during sleep |                      |        |           |           |          |
|---------------------------------------|-------|-------------------|------------------------|-----------------|------------------------------|----------------------|--------|-----------|-----------|----------|
|                                       |       |                   |                        |                 | rate(CI) <sup>f</sup>        | p-value <sup>g</sup> |        | Sound Bin | Sound Bin | Province |
|                                       |       |                   |                        |                 | Variable                     | Bin                  | Day    | *Day      | Province  |          |
| Tinnitus                              | Yes   | 163 (24.9)        | 23.07 (21.66, 24.48)   |                 | 2.41 (2.22, 2.62)            | 0.4811               | 0.2505 | 0.7443    | 0.9113    | 0.6197   |
|                                       | No    | 490 (74.9)        | 23.54 (22.71, 24.38)   |                 | 2.33 (2.20, 2.47)            |                      |        |           |           |          |
| Chronic Pain                          | Yes   | 175 (26.8)        | 22.49 (21.13, 23.85)   |                 | 2.40 (2.21, 2.61)            | 0.5304               | 0.2411 | 0.7369    | 0.9137    | 0.6038   |
|                                       | No    | 478 (73.1)        | 23.71 (22.87, 24.54)   |                 | 2.33 (2.20, 2.47)            |                      |        |           |           |          |
| Asthma                                | Yes   | 59 (9.0)          | 22.61 (20.26, 24.97)   |                 | 2.35 (2.00, 2.77)            | 0.9708               | 0.2511 | 0.7037    | 0.9134    | 0.6120   |
|                                       | No    | 595 (91.0)        | 23.51 (22.74, 24.29)   |                 | 2.35 (2.23, 2.48)            |                      |        |           |           |          |
| Arthritis                             | Yes   | 225 (34.4)        | 22.52 (21.37, 23.68)   |                 | 2.29 (2.11, 2.47)            | 0.4163               | 0.2371 | 0.6807    | 0.9184    | 0.6212   |
|                                       | No    | 429 (65.6)        | 23.88 (22.99, 24.76)   |                 | 2.37 (2.23, 2.51)            |                      |        |           |           |          |
| Chronic bronchitis/<br>emphysema/COPD | Yes   | 46 (7.0)          | 22.43 (20.02, 24.84)   |                 | 2.17 (1.86, 2.54)            | 0.2525               | 0.3320 | 0.6822    | 0.9114    | 0.6877   |
|                                       | No    | 607 (92.8)        | 23.55 (22.76, 24.33)   |                 | 2.38 (2.26, 2.51)            |                      |        |           |           |          |
| Diabetes                              | Yes   | 70 (10.7)         | 23.70 (21.75, 25.65)   |                 | 2.35 (2.05, 2.71)            | 0.9824               | 0.2445 | 0.7036    | 0.9140    | 0.6083   |
|                                       | No    | 584 (89.3)        | 23.38 (22.60, 24.17)   |                 | 2.35 (2.23, 2.47)            |                      |        |           |           |          |
| Heart disease                         | Yes   | 54 (8.3)          | 22.01 (20.27, 23.75)   |                 | 2.27 (2.03, 2.56)            | 0.5829               | 0.2433 | 0.7167    | 0.9104    | 0.6147   |
|                                       | No    | 600 (91.7)        | 23.57 (22.77, 24.37)   |                 | 2.36 (2.23, 2.49)            |                      |        |           |           |          |
| Diagnosed sleep disorder              | Yes   | 64 (9.8)          | 22.15 (19.20, 25.11)   |                 | 2.46 (2.11, 2.88)            | 0.5642               | 0.2490 | 0.7238    | 0.9075    | 0.5640   |
|                                       | No    | 590 (90.2)        | 23.56 (22.78, 24.34)   |                 | 2.35 (2.23, 2.47)            |                      |        |           |           |          |
| Restless leg syndrome                 | Yes   | 98 (15.0)         | 22.24 (20.67, 23.82)   |                 | 2.14 (1.88, 2.43)            | 0.1008               | 0.2405 | 0.6863    | 0.9210    | 0.6676   |
|                                       | No    | 556 (85.0)        | 23.61 (22.80, 24.41)   |                 | 2.38 (2.26, 2.50)            |                      |        |           |           |          |

<sup>a</sup> Least square means based on original scale of data and corresponding 95% confidence interval (CI), linear mixed effects model

<sup>c</sup> observed frequency and proportion of respondents in each subgroup of variable. The % does not always sum to 100 due to missing values

<sup>i</sup> pregnancy status was also considered, but analysis was not conducted due to the small number of pregnant women who participated in the sleep actimetry component of the study (n<5)

<sup>j</sup> based on the number of sleep nights, because people could have slept in a different room on a particular night, or window was open on only certain nights

<sup>f</sup> Least squares means of the rates per 60 minutes, and corresponding 95% confidence interval, based on mixed effects poisson regression model

<sup>g</sup> p-values for the different factors in the generalized mixed effects model using Poisson errors

| Variable <sup>i</sup> | Group | n(%) <sup>c</sup> | mean (CI) <sup>a</sup> | Pair wise tests | Awakening Bouts during sleep |                      |     |          |           |
|-----------------------|-------|-------------------|------------------------|-----------------|------------------------------|----------------------|-----|----------|-----------|
|                       |       |                   |                        |                 | rate(CI) <sup>f</sup>        | p-value <sup>g</sup> |     | Province | Sound Bin |
|                       |       |                   |                        |                 | Variable                     | Bin                  | Day | *Day     | Province  |

<sup>L</sup> Aircraft noise leading to closure of bedroom window was also considered, but analysis was not conducted due to the small number of these responses (n<5)

<sup>M</sup> Unemployment includes stay at home parents, retired, as well as not currently employed

<sup>n</sup> Evaluates the magnitude of reported sleep disturbance for any reason over the previous year while at home

Repeated-measures data from all wrist actigraphy measurements were modeled using the generalized estimating equations (GEE) method. Each of the listed variable represents a separate univariate GEE regression model for the modeled actigraphy endpoint explained by that variable and adjusted for WTN levels, province, day of the week, and the interaction between WTN groups and day of the week. It should be emphasized that variables considered in the univariate analysis have been previously demonstrated to be related to the modeled endpoint and/or considered by the authors to conceptually have a potential association with the modeled endpoint. As the analysis of each listed variable only adjusts for WTN category and province, interpretation of any individual relationship must be made with caution. The wrist actigraphy endpoint of number of awakening bouts does not follow a normal distribution; therefore to analyze awakening bouts a Poisson distribution was assumed. The number of awakening bouts was analyzed with respect to the total time spent in bed and is reported as a rate of the number of awakening bouts per 60 min in bed. Sleep efficiency, sleep latency, and WASO were transformed in order to normalize the data and stabilize the variance. In the GEE models, statistical tests were based on transformed data. Because back-transformation was not possible for some endpoints, the arithmetic mean (least squares mean [LSM]) is presented for all endpoints.

**Supplementary Table II: The influence of personal and situational variables on actigraphy measures**

| Variable <sup>i</sup>             | Group                               | n(%) <sup>c</sup> | mean (CI) <sup>a</sup>  | Pair wise tests | Total sleep time |           |        |                  |          |
|-----------------------------------|-------------------------------------|-------------------|-------------------------|-----------------|------------------|-----------|--------|------------------|----------|
|                                   |                                     |                   |                         |                 | Variable         | Sound Bin | Day    | SoundBin*<br>Day | Province |
| WTN levels                        | <25dBA                              | 46 (7.0)          | 458.00 (428.08, 487.93) |                 | 0.7222           | 0.3504    | 0.2353 | 0.5283           | 0.0223   |
|                                   | [25-30]dBA                          | 48 (7.3)          | 462.68 (427.47, 497.90) |                 |                  |           |        |                  |          |
|                                   | [30-35]dBA                          | 164 (25.1)        | 464.00 (441.44, 486.57) |                 |                  |           |        |                  |          |
|                                   | [35-40]dBA                          | 272 (41.6)        | 449.10 (433.95, 464.24) |                 |                  |           |        |                  |          |
|                                   | [40-46]dBA                          | 124 (19.0)        | 445.78 (426.60, 464.96) |                 |                  |           |        |                  |          |
| Background nighttime sound (BNTS) | <40 dBA                             | 159 (24.3)        | 437.07 (418.14, 456.01) | 0.0532          | 0.9992           | 0.3344    | 0.2390 | 0.6354           | 0.0364   |
|                                   | [40, 50) dBA                        | 224 (34.3)        | 454.17 (437.37, 470.98) |                 |                  |           |        |                  |          |
|                                   | [50, 55) dBA                        | 237 (36.2)        | 472.13 (453.79, 490.47) |                 |                  |           |        |                  |          |
|                                   | >=55 dBA                            | 34 (5.2)          | 482.29 (440.65, 523.93) |                 |                  |           |        |                  |          |
| Sex                               | Male                                | 289 (44.2)        | 457.95 (441.20, 474.69) | 0.7012          | 0.7217           | 0.3510    | 0.2345 | 0.5304           | 0.0241   |
|                                   | Female                              | 365 (55.8)        | 454.42 (442.15, 466.68) |                 |                  |           |        |                  |          |
| Age group                         | ≤24                                 | 32 (4.9)          | 467.20 (420.48, 513.92) | 0.1862          | 0.7225           | 0.3409    | 0.2356 | 0.5012           | 0.0326   |
|                                   | 25-44                               | 148 (22.6)        | 460.97 (441.69, 480.25) |                 |                  |           |        |                  |          |
|                                   | 45-64                               | 302 (46.2)        | 446.02 (431.16, 460.88) |                 |                  |           |        |                  |          |
|                                   | 65+                                 | 172 (26.3)        | 466.88 (450.05, 483.71) |                 |                  |           |        |                  |          |
| Marital Status                    | Married/Common-law                  | 451 (69.0)        | 458.91 (446.28, 471.54) | 0.3583          | 0.7406           | 0.3536    | 0.2347 | 0.5169           | 0.0236   |
|                                   | Widowed/Separated/Divorced          | 125 (19.1)        | 453.68 (432.20, 475.16) |                 |                  |           |        |                  |          |
|                                   | Single, never been married          | 78 (11.9)         | 440.45 (415.82, 465.07) |                 |                  |           |        |                  |          |
| Employment                        | Yes                                 | 327 (50.0)        | 449.56 (435.76, 463.35) | 0.1489          | 0.7791           | 0.3461    | 0.2381 | 0.5376           | 0.0197   |
|                                   | No                                  | 327 (50.0)        | 461.80 (447.73, 475.88) |                 |                  |           |        |                  |          |
| Employment Schedule               | regular daytime/evening shift       | 307 (46.9)        | 450.56 (436.23, 464.89) | 0.1838          | 0.7658           | 0.3435    | 0.2373 | 0.5478           | 0.0217   |
|                                   | Split shift/on call or casual/other | 20 (3.1)          | 437.23 (408.33, 466.13) |                 |                  |           |        |                  |          |
|                                   | Unemployed <sup>M</sup>             | 327 (50.0)        | 461.96 (447.81, 476.10) |                 |                  |           |        |                  |          |
| Level of Education                | ≤High School                        | 355 (54.3)        | 458.88 (445.18, 472.58) | 0.4989          | 0.7071           | 0.3446    | 0.2363 | 0.4987           | 0.0184   |
|                                   | Trade/Certificate/College           | 240 (36.7)        | 449.43 (434.29, 464.58) |                 |                  |           |        |                  |          |
|                                   | University                          | 59 (9.0)          | 464.63 (432.47, 496.79) |                 |                  |           |        |                  |          |

| Variable <sup>i</sup>                        | Group                  | n(%) <sup>c</sup> | mean (CI) <sup>a</sup>  | Total sleep time |          |           |        |               |          |
|----------------------------------------------|------------------------|-------------------|-------------------------|------------------|----------|-----------|--------|---------------|----------|
|                                              |                        |                   |                         | Pair wise tests  | p-value  |           |        |               |          |
|                                              |                        |                   |                         |                  | Variable | Sound Bin | Day    | SoundBin* Day | Province |
| Income                                       | <60K                   | 303 (46.3)        | 462.17 (446.80, 477.54) | 0.3415           | 0.8232   | 0.1074    | 0.2741 | 0.5713        | 0.0292   |
|                                              | 60-100K                | 150 (22.9)        | 446.17 (427.96, 464.38) |                  |          |           |        |               |          |
|                                              | ≥100K                  | 121 (18.5)        | 455.40 (434.55, 476.26) |                  |          |           |        |               |          |
| Alcohol use                                  | Do not drink alcohol   | 167 (25.5)        | 459.88 (440.84, 478.93) | 0.7268           | 0.7127   | 0.3442    | 0.2364 | 0.4345        | 0.0283   |
|                                              | ≤3 times/month         | 254 (38.8)        | 458.86 (443.62, 474.10) |                  |          |           |        |               |          |
|                                              | 1-3 times/week         | 149 (22.8)        | 450.44 (432.91, 467.97) |                  |          |           |        |               |          |
|                                              | ≥4 times/week          | 84 (12.8)         | 446.23 (418.35, 474.12) |                  |          |           |        |               |          |
| Smoking status                               | Current                | 136 (20.8)        | 442.43 (420.59, 464.28) | 0.2334           | 0.7663   | 0.3498    | 0.2354 | 0.5227        | 0.0164   |
|                                              | former                 | 230 (35.2)        | 464.09 (448.51, 479.68) |                  |          |           |        |               |          |
|                                              | never                  | 288 (44.0)        | 455.31 (440.96, 469.66) |                  |          |           |        |               |          |
| BMI group                                    | <25 underweight-normal | 193 (30.9)        | 462.10 (444.43, 479.76) | 0.5602           | 0.2493   | 0.5235    | 0.2353 | 0.6339        | 0.0027   |
|                                              | [25-30) overweight     | 232 (37.1)        | 450.38 (434.56, 466.21) |                  |          |           |        |               |          |
|                                              | ≥30 obese              | 200 (32.0)        | 454.73 (437.53, 471.93) |                  |          |           |        |               |          |
| Caffeine consumption                         | None                   | 81 (12.4)         | 467.26 (441.66, 492.87) | 0.4808           | 0.7274   | 0.3549    | 0.2381 | 0.5110        | 0.0224   |
|                                              | 1 or 2 cups/day        | 319 (48.8)        | 460.06 (445.58, 474.54) |                  |          |           |        |               |          |
|                                              | 3 or 4 cups/day        | 178 (27.2)        | 447.63 (429.63, 465.63) |                  |          |           |        |               |          |
|                                              | 5 or more cups/day     | 76 (11.6)         | 449.69 (427.27, 472.12) |                  |          |           |        |               |          |
| Self-reported sleep disturbance <sup>n</sup> | High                   | 85 (13.0)         | 446.14 (422.57, 469.71) | 0.3682           | 0.7196   | 0.3473    | 0.2297 | 0.4796        | 0.0239   |
|                                              | Low                    | 568 (86.9)        | 457.10 (445.37, 468.83) |                  |          |           |        |               |          |
| Sleep medication                             | Yes                    | 85 (13.0)         | 468.13 (444.10, 492.15) | 0.2575           | 0.7689   | 0.3527    | 0.2370 | 0.5638        | 0.0227   |
|                                              | No                     | 569 (87.0)        | 453.80 (442.03, 465.57) |                  |          |           |        |               |          |
| Type of dwelling                             | Single detached homes  | 593 (90.7)        | 455.12 (443.29, 466.96) | 0.6928           | 0.7617   | 0.3491    | 0.2355 | 0.5243        | 0.0273   |
|                                              | semi/duplex/apartment  | 61 (9.3)          | 461.70 (430.33, 493.07) |                  |          |           |        |               |          |
| Property ownership                           | Own                    | 568 (86.9)        | 454.77 (442.79, 466.75) | 0.5910           | 0.7796   | 0.3476    | 0.2350 | 0.5067        | 0.0268   |
|                                              | rent                   | 86 (13.2)         | 462.56 (435.47, 489.66) |                  |          |           |        |               |          |
| Façade type                                  | Fully Bricked          | 188 (28.8)        | 454.21 (433.93, 474.48) | 0.8694           | 0.7377   | 0.3482    | 0.2360 | 0.5617        | 0.0215   |
|                                              | Partially Bricked      | 102 (15.6)        | 460.53 (439.85, 481.22) |                  |          |           |        |               |          |
|                                              | No Brick/Other         | 364 (55.7)        | 455.29 (442.21, 468.38) |                  |          |           |        |               |          |
| Bedroom volume (1000ft <sup>3</sup> )        | b(SE)                  | 639 (97.7)        | -9.6358 (5.0709)        | 0.0621           | 0.7707   | 0.2797    | 0.2408 | 0.4464        | 0.0220   |

| Variable <sup>i</sup>                                             | Group                        | n(%) <sup>c</sup> | mean (CI) <sup>a</sup>  | Total sleep time |          |           |        |                       |                                    |        |
|-------------------------------------------------------------------|------------------------------|-------------------|-------------------------|------------------|----------|-----------|--------|-----------------------|------------------------------------|--------|
|                                                                   |                              |                   |                         | Pair wise tests  | p-value  |           |        | SoundBin*<br>Province | SoundBin*<br>Province <sup>h</sup> |        |
|                                                                   |                              |                   |                         |                  | Variable | Sound Bin | Day    |                       |                                    | Day    |
| Bedroom location                                                  | Basement                     | 14 (2.1)          | 527.83 (431.13, 624.52) | 0.3529           | 0.7878   | 0.3553    | 0.2398 | 0.4695                | 0.0274                             |        |
|                                                                   | First floor                  | 453 (69.3)        | 453.07 (440.28, 465.86) |                  |          |           |        |                       |                                    |        |
|                                                                   | Second floor or higher       | 187 (28.6)        | 456.59 (440.70, 472.49) |                  |          |           |        |                       |                                    |        |
| Closing bedroom window to block outside noise                     | Yes                          | 211 (32.3)        | 454.16 (437.99, 470.33) | 0.7546           | 0.7281   | 0.3278    | 0.2520 | 0.5218                | 0.0228                             |        |
|                                                                   | No                           | 440 (67.3)        | 456.91 (444.18, 469.63) |                  |          |           |        |                       |                                    |        |
| <b>Source identified as cause for closing window:<sup>L</sup></b> |                              |                   |                         |                  |          |           |        |                       |                                    |        |
| Road traffic                                                      | Yes                          | 95 (14.5)         | 455.93 (433.34, 478.52) | 0.9792           | 0.7508   | 0.3376    | 0.2541 | 0.5143                | 0.0198                             |        |
|                                                                   | No                           | 555 (84.9)        | 456.24 (444.42, 468.05) |                  |          |           |        |                       |                                    |        |
| Rail                                                              | Yes                          | 11 (1.7)          | 488.98 (443.45, 534.51) | 0.1973           | 0.7643   | 0.3387    | 0.2538 | 0.5859                | 0.0189                             |        |
|                                                                   | No                           | 639 (97.7)        | 455.60 (444.14, 467.07) |                  |          |           |        |                       |                                    |        |
| Wind turbines                                                     | Yes                          | 70 (10.7)         | 436.92 (412.03, 461.82) | 0.1022           | 0.8903   | 0.3425    | 0.2532 | 0.5032                | 0.0220                             |        |
|                                                                   | No                           | 580 (88.7)        | 457.66 (446.05, 469.27) |                  |          |           |        |                       |                                    |        |
| Other                                                             | Yes                          | 89 (13.6)         | 462.71 (437.53, 487.89) | 0.5606           | 0.7882   | 0.3401    | 0.2546 | 0.5271                | 0.0193                             |        |
|                                                                   | No                           | 561 (85.8)        | 455.11 (443.38, 466.85) |                  |          |           |        |                       |                                    |        |
| Sleep improved by closing window                                  | Yes                          | 169 (25.8)        | 456.76 (439.01, 474.51) | 0.7141           | 0.7179   | 0.3123    | 0.2406 | 0.5260                | 0.0216                             |        |
|                                                                   | No                           | 39 (6.0)          | 444.44 (414.64, 474.25) |                  |          |           |        |                       |                                    |        |
|                                                                   | Did not need to close window | 440 (67.3)        | 456.95 (444.15, 469.75) |                  |          |           |        |                       |                                    |        |
| Bedroom window type                                               | Single pane                  | 57 (8.7)          | 481.31 (444.70, 517.93) | 0.0734           | 0.7561   | 0.3186    | 0.2470 | 0.3536                | 0.0248                             |        |
|                                                                   | Double pane                  | 581 (88.8)        | 453.45 (441.49, 465.41) |                  |          |           |        |                       |                                    |        |
|                                                                   | Triple pane                  | 15 (2.3)          | 411.11 (369.81, 452.41) |                  |          |           |        |                       |                                    |        |
| Bedroom on quiet side                                             | Yes                          | 370 (56.6)        | 447.96 (434.34, 461.59) | 0.0857           | 0.6592   | 0.3420    | 0.2461 | 0.4612                | 0.0207                             |        |
|                                                                   | No                           | 237 (36.2)        | 464.72 (448.05, 481.38) |                  |          |           |        |                       |                                    |        |
|                                                                   | There is no quiet side       | 46 (7.0)          | 476.49 (443.05, 509.92) |                  |          |           |        |                       |                                    |        |
| Air conditioner in dwelling                                       | Yes                          | 497 (76.0)        | 463.42 (448.41, 478.44) | 0.1842           | 0.7486   | 0.3516    | 0.2322 | 0.7457                | 0.0269                             |        |
|                                                                   | No                           | 157 (24.0)        | 446.05 (427.25, 464.85) |                  |          |           |        |                       |                                    |        |
| Air conditioning unit in bedroom                                  | Yes                          | 47 (7.2)          | 432.15 (408.64, 455.65) | A                | 0.0382   | 0.8076    | 0.3496 | 0.2363                | 0.5736                             | 0.0283 |
|                                                                   | No                           | 63 (9.6)          | 486.25 (449.29, 523.21) | B                |          |           |        |                       |                                    |        |
|                                                                   | central AC or other          | 387 (59.2)        | 465.30 (448.56, 482.03) | B                |          |           |        |                       |                                    |        |
|                                                                   | NO AC                        | 157 (24.0)        | 444.85 (426.01, 463.69) | AB               |          |           |        |                       |                                    |        |

| Variable <sup>i</sup>                         | Group                                         | n(%) <sup>c</sup> | mean (CI) <sup>a</sup>  | Pair<br>wise<br>tests | Total sleep time |        |        |        |           |                       |
|-----------------------------------------------|-----------------------------------------------|-------------------|-------------------------|-----------------------|------------------|--------|--------|--------|-----------|-----------------------|
|                                               |                                               |                   |                         |                       | p-value          |        |        | Sound  | SoundBin* | SoundBin*             |
|                                               |                                               |                   |                         |                       | Variable         | Bin    | Day    | Day    | Province  | Province <sup>h</sup> |
| Any windows in the room<br>in which you slept | Yes                                           | 3258 <sup>j</sup> | 457.98 (444.30, 471.66) |                       | 0.2452           | 0.7564 | 0.4084 | 0.5422 | 0.8532    | 0.0172                |
|                                               | No                                            | 194 <sup>j</sup>  | 439.63 (409.22, 470.04) |                       |                  |        |        |        |           |                       |
| At least one window open                      | Yes                                           | 1368 <sup>j</sup> | 459.40 (442.71, 476.08) |                       | 0.8182           | 0.8676 | 0.3008 | 0.6812 | 0.8428    | 0.0315                |
|                                               | No                                            | 1854 <sup>j</sup> | 457.70 (442.51, 472.88) |                       |                  |        |        |        |           |                       |
| Number of years hearing<br>the WT             | Do not hear wind turbines<br>less than 1 year | 331 (50.6)        | 463.77 (450.07, 477.46) | A                     | 0.0212           | 0.9814 | 0.3448 | 0.2389 | 0.5220    | 0.0284                |
|                                               | 1 year or more                                | 30 (4.6)          | 417.67 (388.42, 446.92) | B                     |                  |        |        |        |           |                       |
|                                               |                                               | 291 (44.5)        | 445.15 (427.45, 462.85) | AB                    |                  |        |        |        |           |                       |
| Complaint about WT                            | Yes                                           | 26 (4.0)          | 458.72 (423.65, 493.79) |                       | 0.8758           | 0.7313 | 0.3348 | 0.2382 | 0.5285    | 0.0222                |
|                                               | No                                            | 625 (95.6)        | 455.90 (444.34, 467.46) |                       |                  |        |        |        |           |                       |
| Concerned about physical<br>safety            | High                                          | 41 (6.3)          | 420.46 (398.13, 442.79) | A                     | 0.0034           | 0.8334 | 0.3293 | 0.2466 | 0.5904    | 0.0316                |
|                                               | Low                                           | 608 (93.0)        | 458.36 (446.79, 469.93) | B                     |                  |        |        |        |           |                       |
| Personal benefits                             | Yes                                           | 59 (9.0)          | 467.63 (432.20, 503.07) |                       | 0.4416           | 0.7447 | 0.3585 | 0.2685 | 0.3341    | 0.0325                |
|                                               | No                                            | 571 (87.3)        | 453.10 (441.36, 464.84) |                       |                  |        |        |        |           |                       |
| Audible wind turbines                         | Yes                                           | 323 (49.4)        | 442.70 (425.73, 459.66) | A                     | 0.0391           | 0.9878 | 0.3427 | 0.2326 | 0.5824    | 0.0255                |
|                                               | No                                            | 331 (50.6)        | 464.27 (450.58, 477.96) | B                     |                  |        |        |        |           |                       |
| Audible road traffic                          | Yes                                           | 546 (83.5)        | 453.48 (441.10, 465.86) |                       | 0.2707           | 0.7623 | 0.3451 | 0.2347 | 0.5715    | 0.0255                |
|                                               | No                                            | 108 (16.5)        | 466.85 (444.69, 489.01) |                       |                  |        |        |        |           |                       |
| Audible aircraft                              | Yes                                           | 347 (53.1)        | 448.12 (434.24, 462.01) |                       | 0.0637           | 0.8146 | 0.3466 | 0.2326 | 0.5399    | 0.0302                |
|                                               | No                                            | 307 (46.9)        | 464.35 (449.49, 479.21) |                       |                  |        |        |        |           |                       |
| Audible rail                                  | Yes                                           | 120 (18.4)        | 453.90 (430.23, 477.57) |                       | 0.8476           | 0.7259 | 0.3495 | 0.2355 | 0.5056    | 0.0299                |
|                                               | No                                            | 534 (81.7)        | 456.27 (444.47, 468.07) |                       |                  |        |        |        |           |                       |
| ONT: audible rail                             | Yes                                           | 120 (23.7)        | 476.57 (453.74, 499.40) |                       | 0.9536           | 0.6307 | 0.5168 | 0.5176 |           |                       |
|                                               | No                                            | 387 (76.3)        | 477.32 (462.87, 491.78) |                       |                  |        |        |        |           |                       |
| Annoyed by snoring                            | High                                          | 33 (5.1)          | 445.96 (419.40, 472.52) |                       | 0.4561           | 0.7179 | 0.3483 | 0.2350 | 0.5348    | 0.0224                |
|                                               | Low                                           | 621 (95.0)        | 456.45 (444.88, 468.02) |                       |                  |        |        |        |           |                       |
| <b>Source of sleep disturbance</b>            |                                               |                   |                         |                       |                  |        |        |        |           |                       |
| Wind turbines                                 | Yes                                           | 37 (5.7)          | 421.09 (396.45, 445.74) | A                     | 0.0050           | 0.9396 | 0.3485 | 0.2195 | 0.5697    | 0.0434                |
|                                               | No                                            | 594 (90.8)        | 458.68 (446.68, 470.68) | B                     |                  |        |        |        |           |                       |

| Variable <sup>i</sup>             | Group | n(%) <sup>c</sup> | Total sleep time        |                 |          |           |        |                  |          |                                    |
|-----------------------------------|-------|-------------------|-------------------------|-----------------|----------|-----------|--------|------------------|----------|------------------------------------|
|                                   |       |                   | mean (CI) <sup>a</sup>  | Pair wise tests | p-value  |           |        |                  |          |                                    |
|                                   |       |                   |                         |                 | Variable | Sound Bin | Day    | SoundBin*<br>Day | Province | SoundBin*<br>Province <sup>h</sup> |
| Children                          | Yes   | 45 (6.9)          | 473.27 (435.03, 511.52) | 0.3717          | 0.8583   | 0.3390    | 0.2165 | 0.5883           | 0.0410   |                                    |
|                                   | No    | 586 (89.6)        | 455.73 (443.56, 467.91) |                 |          |           |        |                  |          |                                    |
| Pets                              | Yes   | 47 (7.2)          | 465.90 (429.51, 502.30) | 0.6200          | 0.8662   | 0.3400    | 0.2172 | 0.6722           | 0.0437   |                                    |
|                                   | No    | 584 (89.3)        | 456.87 (444.93, 468.81) |                 |          |           |        |                  |          |                                    |
| Neighbours                        | Yes   | 20 (3.1)          | 533.19 (455.04, 611.33) | 0.0565          | 0.8923   | 0.3504    | 0.2245 | 0.8386           | 0.0547   |                                    |
|                                   | No    | 611 (93.4)        | 455.38 (443.61, 467.15) |                 |          |           |        |                  |          |                                    |
| Stress/anxiety                    | Yes   | 35 (5.4)          | 488.10 (435.74, 540.46) | 0.2341          | 0.8813   | 0.3446    | 0.2246 | 0.6889           | 0.0418   |                                    |
|                                   | No    | 596 (91.1)        | 455.86 (443.88, 467.83) |                 |          |           |        |                  |          |                                    |
| Health related/physical pain      | Yes   | 84 (12.8)         | 425.61 (404.21, 447.01) | A               | 0.0024   | 0.7226    | 0.3430 | 0.2193           | 0.4949   | 0.0328                             |
|                                   | No    | 547 (83.6)        | 461.66 (449.25, 474.07) | B               |          |           |        |                  |          |                                    |
| Snoring                           | Yes   | 32 (4.9)          | 456.90 (431.08, 482.73) | 0.9690          | 0.8797   | 0.3445    | 0.2177 | 0.6374           | 0.0443   |                                    |
|                                   | No    | 599 (91.6)        | 457.41 (445.37, 469.45) |                 |          |           |        |                  |          |                                    |
| Other                             | Yes   | 312 (47.7)        | 449.54 (434.76, 464.32) | 0.1175          | 0.8228   | 0.3424    | 0.2195 | 0.5444           | 0.0414   |                                    |
|                                   | No    | 319 (48.8)        | 464.03 (448.85, 479.22) |                 |          |           |        |                  |          |                                    |
| Sensitivity to noise              | High  | 99 (15.1)         | 446.08 (426.52, 465.64) | 0.2697          | 0.7279   | 0.3239    | 0.2273 | 0.4495           | 0.0195   |                                    |
|                                   | Low   | 552 (84.4)        | 457.45 (445.44, 469.46) |                 |          |           |        |                  |          |                                    |
| Annoyance to WTN                  | High  | 42 (6.4)          | 439.57 (412.03, 467.10) | 0.2337          | 0.7846   | 0.3409    | 0.2386 | 0.5002           | 0.0225   |                                    |
|                                   | Low   | 611 (93.4)        | 456.54 (445.02, 468.06) |                 |          |           |        |                  |          |                                    |
| Annoyance with blinking lights    | High  | 59 (9.0)          | 410.14 (387.85, 432.44) | A               | 0.0001   | 0.8358    | 0.3331 | 0.2375           | 0.3770   | 0.0284                             |
|                                   | Low   | 594 (90.8)        | 458.36 (446.81, 469.92) | B               |          |           |        |                  |          |                                    |
| Shadow flicker annoyance          | High  | 44 (6.7)          | 422.13 (400.98, 443.27) | A               | 0.0019   | 0.8640    | 0.3337 | 0.2359           | 0.4843   | 0.0280                             |
|                                   | Low   | 608 (93.0)        | 457.62 (446.02, 469.22) | B               |          |           |        |                  |          |                                    |
| Notice vibrations                 | Yes   | 32 (4.9)          | 453.65 (413.16, 494.14) | 0.8972          | 0.7191   | 0.3658    | 0.2530 | 0.5096           | 0.0261   |                                    |
|                                   | No    | 616 (94.2)        | 456.32 (444.80, 467.84) |                 |          |           |        |                  |          |                                    |
| Annoyance with vibrations/rattles | High  | 9 (1.4)           | 450.08 (407.32, 492.83) | 0.7772          | 0.7141   | 0.3666    | 0.2535 | 0.5065           | 0.0263   |                                    |
|                                   | Low   | 639 (97.7)        | 456.27 (444.81, 467.72) |                 |          |           |        |                  |          |                                    |
| Migraines                         | Yes   | 171 (26.2)        | 437.05 (418.78, 455.31) | A               | 0.0160   | 0.7250    | 0.3576 | 0.2284           | 0.4288   | 0.0147                             |
|                                   | No    | 483 (73.9)        | 461.41 (449.55, 473.27) | B               |          |           |        |                  |          |                                    |
| Dizziness                         | Yes   | 163 (24.9)        | 457.75 (439.33, 476.17) | 0.8055          | 0.7300   | 0.3498    | 0.2353 | 0.5343           | 0.0246   |                                    |
|                                   | No    | 491 (75.1)        | 455.34 (443.00, 467.67) |                 |          |           |        |                  |          |                                    |

| Variable <sup>i</sup>                 | Group | n(%) <sup>c</sup> | mean (CI) <sup>a</sup>  | Total sleep time |          |           |        |           |          |
|---------------------------------------|-------|-------------------|-------------------------|------------------|----------|-----------|--------|-----------|----------|
|                                       |       |                   |                         | Pair wise tests  | p-value  |           |        | SoundBin* |          |
|                                       |       |                   |                         |                  | Variable | Sound Bin | Day    | Day       | Province |
| Tinnitus                              | Yes   | 163 (24.9)        | 449.68 (431.69, 467.67) | 0.3773           | 0.7134   | 0.3454    | 0.2344 | 0.5286    | 0.0204   |
|                                       | No    | 490 (74.9)        | 458.24 (445.71, 470.78) |                  |          |           |        |           |          |
| Chronic Pain                          | Yes   | 175 (26.8)        | 452.70 (433.42, 471.97) | 0.6992           | 0.6969   | 0.3465    | 0.2352 | 0.4848    | 0.0200   |
|                                       | No    | 478 (73.1)        | 456.67 (444.43, 468.91) |                  |          |           |        |           |          |
| Asthma                                | Yes   | 59 (9.0)          | 447.49 (417.59, 477.40) | 0.5424           | 0.7186   | 0.3517    | 0.2363 | 0.5151    | 0.0229   |
|                                       | No    | 595 (91.0)        | 456.84 (445.17, 468.50) |                  |          |           |        |           |          |
| Arthritis                             | Yes   | 225 (34.4)        | 457.06 (440.77, 473.36) | 0.8534           | 0.7297   | 0.3498    | 0.2343 | 0.5368    | 0.0226   |
|                                       | No    | 429 (65.6)        | 455.37 (442.42, 468.32) |                  |          |           |        |           |          |
| Chronic bronchitis/<br>emphysema/COPD | Yes   | 46 (7.0)          | 463.77 (423.00, 504.54) | 0.6797           | 0.7412   | 0.3471    | 0.2520 | 0.5709    | 0.0216   |
|                                       | No    | 607 (92.8)        | 455.20 (443.71, 466.69) |                  |          |           |        |           |          |
| Diabetes                              | Yes   | 70 (10.7)         | 461.72 (429.73, 493.71) | 0.6867           | 0.7360   | 0.3489    | 0.2348 | 0.5184    | 0.0219   |
|                                       | No    | 584 (89.3)        | 455.17 (443.73, 466.60) |                  |          |           |        |           |          |
| Heart disease                         | Yes   | 54 (8.3)          | 461.56 (429.49, 493.64) | 0.7069           | 0.7511   | 0.3513    | 0.2343 | 0.5168    | 0.0224   |
|                                       | No    | 600 (91.7)        | 455.28 (443.57, 466.98) |                  |          |           |        |           |          |
| Diagnosed sleep disorder              | Yes   | 64 (9.8)          | 429.93 (401.83, 458.02) | 0.0642           | 0.6271   | 0.3495    | 0.2362 | 0.3961    | 0.0216   |
|                                       | No    | 590 (90.2)        | 458.57 (446.86, 470.28) |                  |          |           |        |           |          |
| Restless leg syndrome                 | Yes   | 98 (15.0)         | 446.59 (421.67, 471.52) | 0.4129           | 0.6965   | 0.3495    | 0.2353 | 0.5306    | 0.0214   |
|                                       | No    | 556 (85.0)        | 457.43 (445.68, 469.17) |                  |          |           |        |           |          |

<sup>a</sup> Least square means based on original scale of data and corresponding 95% confidence interval (CI), linear mixed effects model

<sup>c</sup> observed frequency and proportion of respondents in each subgroup of variable. The % does not always sum to 100 due to missing values

<sup>i</sup> pregnancy status was also considered, but analysis was not conducted due to the small number of pregnant women who participated in the sleep actimetry component of the study (n<5)

<sup>j</sup> based on the number of sleep nights, because people could have slept in a different room on a particular night, or window was open on only certain nights

<sup>h</sup> The interaction between WTN and province was significant (p=0.0223). Levels of total sleep time are similar between ON and PEI at each WTN group except at the highest WTN ( $\geq 40$ dBa), where ON has significantly higher total sleep time compared to PEI (p=0.0377). When considering the relationship between total sleep time and WTN group in each province there was no significant difference between WTN in PEI (p=0.0769); in ON also, there is no significant difference in total sleep time between WTN groups (p=0.4288). With other confounders in the model, the interaction between WTN and province still remains significant (0.01<p<0.05). The difference was always between the highest WTN groups in ON and PEI, with ON having higher total sleep time compared to PEI. No differences were observed in PEI between WTN groups, or in ONT. This interaction is no longer significant in the multiple mixed effects models for total sleep time.

| Variable <sup>i</sup> | Group | n(%) <sup>c</sup> | mean (CI) <sup>a</sup> | Pair<br>wise<br>tests | Total sleep time |              |     |         |
|-----------------------|-------|-------------------|------------------------|-----------------------|------------------|--------------|-----|---------|
|                       |       |                   |                        |                       | Variable         | Sound<br>Bin | Day | p-value |

<sup>L</sup> Aircraft noise leading to closure of bedroom window was also considered, but analysis was not conducted due to the small number of these responses (n<5)

<sup>M</sup> Unemployment includes stay at home parents, retired, as well as not currently employed

<sup>n</sup> Evaluates the magnitude of reported sleep disturbance for any reason over the previous year while at home

Repeated-measures data from all wrist actigraphy measurements were modeled using the generalized estimating equations (GEE) method. Each of the listed variable represents a separate univariate GEE regression model for the modeled actigraphy endpoint explained by that variable and adjusted for WTN levels, province, day of the week, and the interaction between WTN groups and day of the week. It should be emphasized that variables considered in the univariate analysis have been previously demonstrated to be related to the modeled endpoint and/or considered by the authors to conceptually have a potential association with the modeled endpoint. As the analysis of each listed variable only adjusts for WTN category and province, interpretation of any individual relationship must be made with caution. The wrist actigraphy endpoint of number of awakening bouts does not follow a normal distribution; therefore to analyze awakening bouts a Poisson distribution was assumed. The number of awakening bouts was analyzed with respect to the total time spent in bed and is reported as a rate of the number of awakening bouts per 60 min in bed. Sleep efficiency, sleep latency, and WASO were transformed in order to normalize the data and stabilize the variance. In the GEE models, statistical tests were based on transformed data. Because back-transformation was not possible for some endpoints, the arithmetic mean (least squares mean [LSM]) is presented for all endpoints.

### Supplementary Table III: Correlation between PSQI scores and sleep actigraphy endpoints

Observed correlations between the PSQI and the actigraphy endpoints. Tests were only conducted for corresponding endpoints, with the exception that the global PSQI score was compared to all actigraphy measurements.

| PSQI Scale        |                                | Mean of Sleep Actigraphy endpoints |                             |               |                 |                             |
|-------------------|--------------------------------|------------------------------------|-----------------------------|---------------|-----------------|-----------------------------|
|                   |                                | Sleep Latency                      | Sleep Efficiency            | WASO          | Awakening Bouts | Total Sleep Time            |
| Sleep Latency     | n                              | 647                                |                             |               |                 |                             |
|                   | Pearson (p-value) <sup>a</sup> | 0.02 (0.6939)                      |                             |               |                 |                             |
| Sleep Efficiency  | n                              |                                    | 654                         |               |                 |                             |
|                   | Pearson (p-value) <sup>a</sup> |                                    | -0.10 (0.0134) <sup>b</sup> |               |                 |                             |
| Sleep Disturbance | n                              |                                    |                             | 649           | 649             |                             |
|                   | Pearson (p-value) <sup>a</sup> |                                    |                             | 0.07 (0.0709) | 0.02 (0.6904)   |                             |
| Duration of Sleep | n                              |                                    |                             |               |                 | 654                         |
|                   | Pearson (p-value) <sup>a</sup> |                                    |                             |               |                 | -0.12 (0.0023) <sup>c</sup> |
| Global PSQI       | n                              | 640                                | 640                         | 640           | 640             | 640                         |
|                   | Pearson (p-value) <sup>a</sup> | 0.01 (0.8668)                      | -0.07 (0.0994)              | 0.01 (0.7296) | -0.03 (0.5163)  | -0.03 (0.4732)              |

<sup>a</sup> Results were similar between the Pearson and Spearman correlation coefficient therefore only the Pearson correlation coefficient is presented here.

<sup>b</sup> Sleep efficiency, as measured by the PSQI, was found to correlate negatively with sleep efficiency measured by sleep actigraphy (n=654, r = -0.10, p=0.0134). A negative correlation indicates that as the PSQI score for sleep efficiency increased (i.e. worse sleep efficiency), sleep efficiency from the actigraphs had correspondingly lower values.

<sup>c</sup> The rating of sleep duration, as measured by PSQI, correlated negatively with total sleep time as measured by actigraphy (n=654, r = -0.12, p=0.0023). A negative correlation indicates that as the PSQI score for sleep duration increased (i.e. worse sleep duration or less time sleeping), the actual sleep time as measured by actigraphy decreased.

## Supplementary Table IV: Multiple generalized estimating equations (GEE) regression model for sleep efficiency

Repeated-measures data from all wrist actigraphy measurements were modeled using the generalized estimating equations (GEE) method. Multiple GEE regression models for each actigraphy endpoint were developed using the stepwise method with a 20% significance entry criterion and a 10% significance criterion to remain in the model. An unstructured variance-covariance structure between sleep nights was applied to all endpoints with the exception of sleep latency, where compound symmetry was used. The wrist actigraphy endpoint of sleep efficiency does not follow a normal distribution, because it is a proportion ranging between 0 and 1. Therefore, sleep efficiency was transformed in order to normalize the data and stabilize the variance. In the GEE models, statistical tests were based on transformed data in order to satisfy the normality and constant variance assumptions. Because back-transformation was not possible for some endpoints, the arithmetic mean (least squares mean [LSM]) is presented for all endpoints. All regression models for actigraphy endpoints were adjusted for provincial differences. Province was treated as a confounder in the model with associated adjustments, as required. Day of the week was forced into the model.

| Variable                        | Group                     | LSM (95% CI) <sup>a</sup> | PWT <sup>b</sup> | p-value <sup>b</sup> |
|---------------------------------|---------------------------|---------------------------|------------------|----------------------|
| WTN levels (dB) <sup>c</sup>    | <25                       | 85.62 (83.97, 87.28)      |                  | 0.3932               |
|                                 | [25–30)                   | 87.28 (85.55, 89.01)      |                  |                      |
|                                 | [30–35)                   | 85.82 (84.52, 87.13)      |                  |                      |
|                                 | [35–40)                   | 85.97 (84.86, 87.08)      |                  |                      |
|                                 | [40–46]                   | 86.16 (84.84, 87.48)      |                  |                      |
| Day of the week                 | Friday                    | 86.44 (85.09, 87.79)      |                  | 0.8192               |
|                                 | Saturday                  | 86.43 (85.25, 87.61)      |                  |                      |
|                                 | Sunday                    | 86.07 (84.82, 87.32)      |                  |                      |
|                                 | Monday                    | 86.14 (84.99, 87.29)      |                  |                      |
|                                 | Tuesday                   | 85.92 (84.72, 87.12)      |                  |                      |
|                                 | Wednesday                 | 86.27 (85.06, 87.47)      |                  |                      |
|                                 | Thursday                  | 85.93 (84.71, 87.14)      |                  |                      |
| Province                        | PEI                       | 86.07 (84.84, 87.29)      |                  | 0.6412               |
|                                 | ON                        | 86.27 (85.13, 87.41)      |                  |                      |
| Sex                             | Male                      | 85.62 (84.47, 86.77)      | A                | 0.0454               |
|                                 | Female                    | 86.72 (85.61, 87.83)      | B                |                      |
| Level of Education              | ≤High School              | 85.55 (84.50, 86.60)      | A                | 0.0325               |
|                                 | Trade/Certificate/College | 86.74 (85.59, 87.89)      | B                |                      |
|                                 | University                | 86.22 (84.68, 87.77)      | AB               |                      |
| Complaint about wind turbines   | Yes                       | 87.10 (85.27, 88.94)      |                  | 0.062                |
|                                 | No                        | 85.24 (84.56, 85.91)      |                  |                      |
| BMI group                       | <25 underweight-normal    | 86.82 (85.63, 88.01)      |                  | 0.0625               |
|                                 | 25–<30 overweight         | 86.05 (84.87, 87.23)      |                  |                      |
|                                 | ≥30 obese                 | 85.64 (84.41, 86.86)      |                  |                      |
| Caffeine consumption (cups/day) | None                      | 86.64 (85.10, 88.18)      | AB               | 0.039                |
|                                 | 1 or 2                    | 86.53 (85.47, 87.59)      | A                |                      |
|                                 | 3 or 4                    | 84.95 (83.66, 86.25)      | B                |                      |
|                                 | 5 or more                 | 86.56 (85.22, 87.90)      | AB               |                      |

n=618, sleep nights=3561, QIC=3639

<sup>a</sup> LSM - Least squares means of sleep efficiency (x) for each group after adjusting for all other variables in the multiple GEE regression model and corresponding 95% confidence interval (CI).

<sup>b</sup> p-values and pairwise tests (PWT) based on the transformed variable ( $\arcsin(\sqrt{x})$ ) in order to satisfy model assumptions of normality and constant variance. Groups within a variable with the same letter are statistically similar whereas groups with different letters are statistically different.

<sup>c</sup> the interaction between WTN group and Day of the week was included in the model and was not significant  $p=0.2218$ .

## Supplementary Table V: Multiple generalized estimating equations (GEE) regression model for sleep latency

Repeated-measures data from all wrist actigraphy measurements were modeled using the generalized estimating equations (GEE) method. Multiple GEE regression models for each actigraphy endpoint were developed using the stepwise method with a 20% significance entry criterion and a 10% significance criterion to remain in the model. An unstructured variance-covariance structure between sleep nights was applied to all endpoints with the exception of sleep latency, where compound symmetry was used. Sleep latency was transformed in order to normalize the data and stabilize the variance. In the GEE models, statistical tests were based on transformed data in order to satisfy the normality and constant variance assumptions. Because back-transformation was not possible for some endpoints, the arithmetic mean (least squares mean [LSM]) is presented for all endpoints. All regression models for actigraphy endpoints were adjusted for provincial differences. Province was treated as a confounder in the model with associated adjustments, as required. Day of the week was forced in.

| Variable                                        | Group                  | LSM (95% CI) <sup>a</sup> | PWT <sup>b</sup> | p-value <sup>b</sup> |
|-------------------------------------------------|------------------------|---------------------------|------------------|----------------------|
| WTN levels (dB) <sup>c</sup>                    | <25                    | 15.08 (10.03, 20.13)      |                  | 0.6491               |
|                                                 | [25–30)                | 10.88 (6.45, 15.32)       |                  |                      |
|                                                 | [30–35)                | 9.95 (7.02, 12.87)        |                  |                      |
|                                                 | [35–40)                | 10.71 (7.88, 13.54)       |                  |                      |
|                                                 | [40–46]                | 10.92 (7.01, 14.82)       |                  |                      |
| Day of the week                                 | Friday                 | 11.08 (6.82, 15.33)       |                  | 0.9272               |
|                                                 | Saturday               | 12.53 (8.74, 16.33)       |                  |                      |
|                                                 | Sunday                 | 11.89 (8.35, 15.43)       |                  |                      |
|                                                 | Monday                 | 12.04 (8.84, 15.23)       |                  |                      |
|                                                 | Tuesday                | 10.78 (7.67, 13.88)       |                  |                      |
|                                                 | Wednesday              | 11.62 (8.25, 14.98)       |                  |                      |
|                                                 | Thursday               | 10.62 (7.74, 13.50)       |                  |                      |
| Province                                        | PEI                    | 11.03 (7.93, 14.13)       |                  | 0.2992               |
|                                                 | ON                     | 11.98 (9.81, 14.16)       |                  |                      |
| Age group                                       | ≤24                    | 10.90 (6.50, 15.31)       | AB               | 0.0234               |
|                                                 | 25–44                  | 8.90 (5.79, 12.01)        | A                |                      |
|                                                 | 45–64                  | 11.69 (9.27, 14.12)       | AB               |                      |
|                                                 | 65+                    | 14.53 (11.32, 17.74)      | B                |                      |
| Closure of bedroom windows-"Other" <sup>d</sup> | Yes                    | 10.90 (7.38, 14.42)       | A                | 0.0417               |
|                                                 | No                     | 12.12 (10.10, 14.13)      | B                |                      |
| BMI group                                       | <25 underweight-normal | 9.63 (6.81, 12.44)        | A                | 0.0027               |
|                                                 | 25–<30 overweight      | 11.26 (8.43, 14.09)       | AB               |                      |
|                                                 | ≥30 obese              | 13.64 (10.59, 16.69)      | B                |                      |
| Asthma                                          | Yes                    | 9.19 (5.78, 12.60)        | A                | 0.0112               |
|                                                 | No                     | 13.82 (11.68, 15.97)      | B                |                      |

n = 526, sleep nights=3017, QIC=3068

<sup>a</sup> LSM Least squares means of sleep latency for each group after adjusting for all other variables in the multiple GEE regression model and corresponding 95% confidence interval (CI).

<sup>b</sup> p-values and pairwise tests (PWT) based on the transformed sleep latency variable ( $\log(x+1)$ ) in order to satisfy model assumptions of normality and constant variance. Groups within a variable with the same letter are statistically similar whereas groups with different letters are statistically different.

<sup>c</sup> the interaction between WTN group and Day of the week was included in the model and was not statistically significant  $p=0.3888$ .

<sup>d</sup> The source identified by participants as the cause of closing bedroom windows to reduce noise levels was not road traffic, aircraft, rail or wind turbines.

## Supplementary Table VI: Multiple generalized estimating equations (GEE) regression model for total sleep time

Repeated-measures data from all wrist actigraphy measurements were modeled using the generalized estimating equations (GEE) method. Multiple GEE regression models for each actigraphy endpoint were developed using the stepwise method with a 20% significance entry criterion and a 10% significance criterion to remain in the model. An unstructured variance-covariance structure between sleep nights was applied to all endpoints with the exception of sleep latency, where compound symmetry was used. In the GEE models, statistical tests were based on transformed data in order to satisfy the normality and constant variance assumptions. Because back-transformation was not possible for some endpoints, the arithmetic mean (least squares mean [LSM]) is presented for all endpoints. All regression models for actigraphy endpoints were adjusted for provincial differences. Province was treated as a confounder in the model with associated adjustments, as required. Day of the week was forced in.

| Variable                              | Group                  | LSM (95% CI) <sup>a</sup> | PWT <sup>b</sup> | p-value <sup>b</sup> |
|---------------------------------------|------------------------|---------------------------|------------------|----------------------|
| WTN levels (dB) <sup>c</sup>          | <25                    | 462.41 (407.97, 516.84)   |                  | 0.8002               |
|                                       | [25–30)                | 453.43 (401.10, 505.76)   |                  |                      |
|                                       | [30–35)                | 455.22 (406.72, 503.72)   |                  |                      |
|                                       | [35–40)                | 466.12 (416.21, 516.02)   |                  |                      |
|                                       | [40–46]                | 472.95 (422.09, 523.81)   |                  |                      |
| Day of the week                       | Friday                 | 451.31 (402.05, 500.56)   |                  | 0.2854               |
|                                       | Saturday               | 467.85 (420.10, 515.60)   |                  |                      |
|                                       | Sunday                 | 472.45 (422.56, 522.35)   |                  |                      |
|                                       | Monday                 | 468.71 (419.17, 518.24)   |                  |                      |
|                                       | Tuesday                | 460.11 (411.50, 508.71)   |                  |                      |
|                                       | Wednesday              | 461.72 (413.92, 509.51)   |                  |                      |
|                                       | Thursday               | 452.03 (403.33, 500.73)   |                  |                      |
| Province                              | PEI                    | 471.20 (419.16, 523.24)   |                  | 0.2628               |
|                                       | ON                     | 452.84 (406.56, 499.12)   |                  |                      |
| Background nighttime sound level (dB) | <40                    | 434.24 (387.45, 481.02)   | A                | 0.048                |
|                                       | 40–<50                 | 460.71 (412.39, 509.03)   | AB               |                      |
|                                       | 50–<55                 | 472.06 (421.79, 522.34)   | B                |                      |
|                                       | >55–61                 | 481.09 (423.54, 538.64)   | AB               |                      |
| Bedroom window type                   | Single                 | 498.85 (439.95, 557.75)   |                  | 0.0544               |
|                                       | Double                 | 460.17 (419.01, 501.33)   |                  |                      |
|                                       | Triple                 | 427.06 (367.63, 486.49)   |                  |                      |
| Air conditioning unit in bedroom      | Yes                    | 434.68 (385.77, 483.59)   | A                | 0.0313               |
|                                       | No                     | 489.20 (431.00, 547.39)   | AB               |                      |
|                                       | central AC or other    | 475.02 (426.85, 523.20)   | B                |                      |
|                                       | NO AC                  | 449.20 (398.73, 499.66)   | AB               |                      |
| Sleep disturbed by neighbours         | Yes                    | 501.92 (423.27, 580.58)   | A                | 0.0373               |
|                                       | No                     | 422.13 (393.09, 451.16)   | B                |                      |
| Sleep disturbed by pain               | Yes                    | 446.11 (396.61, 495.61)   | A                | 0.0084               |
|                                       | No                     | 477.94 (431.56, 524.31)   | B                |                      |
| Annoyed with blinking lights          | High                   | 438.82 (388.85, 488.80)   | A                | 0.0006               |
|                                       | Low                    | 485.23 (439.16, 531.29)   | B                |                      |
| Bedroom on quiet side                 | Yes                    | 445.59 (398.61, 492.57)   |                  | 0.0742               |
|                                       | No                     | 462.96 (416.76, 509.15)   |                  |                      |
|                                       | There is no quiet side | 477.53 (420.75, 534.31)   |                  |                      |
| Diagnosed sleep disorder              | Yes                    | 448.90 (397.93, 499.87)   |                  | 0.0969               |
|                                       | No                     | 475.15 (428.50, 521.79)   |                  |                      |

n=619, sleep nights=3552, QIC=3644

<sup>a</sup> LSM Least squares means of total sleep time for each group after adjusting for all other variables in the multiple GEE regression model and corresponding 95% confidence interval (CI).

<sup>b</sup> p-values and pairwise tests (PWT) based on the total sleep time. Groups within a variable with the same letter are statistically similar whereas groups with different letters are statistically different.

<sup>c</sup> the interaction between WTN group and Day of the week was included in the model and was not statistically significant  $p=0.2866$ .

## Supplementary Table VII: Multiple generalized estimating equations (GEE) regression model for duration of awakenings after sleep onset (WASO)

Repeated-measures data from all wrist actigraphy measurements were modeled using the generalized estimating equations (GEE) method. Multiple GEE regression models for each actigraphy endpoint were developed using the stepwise method with a 20% significance entry criterion and a 10% significance criterion to remain in the model. An unstructured variance-covariance structure between sleep nights was applied to all endpoints with the exception of sleep latency, where compound symmetry was used. WASO was transformed in order to normalize the data and stabilize the variance. In the GEE models, statistical tests were based on transformed data in order to satisfy the normality and constant variance assumptions. Because back-transformation was not possible for some endpoints, the arithmetic mean (least squares mean [LSM]) is presented for all endpoints. All regression models for actigraphy endpoints were adjusted for provincial differences. Province was treated as a confounder in the model with associated adjustments, as required. Day of the week was forced in the model.

| Variable                              | Group                     | LSM (95% CI) <sup>a</sup> | PWT <sup>b</sup> | p-value <sup>b</sup> |
|---------------------------------------|---------------------------|---------------------------|------------------|----------------------|
| WTN levels (dB) <sup>c</sup>          | <25                       | 62.00 (55.14, 68.85)      | A                | 0.0056               |
|                                       | [25–30)                   | 51.67 (44.14, 59.20)      | B                |                      |
|                                       | [30–35)                   | 56.11 (50.81, 61.42)      | AB               |                      |
|                                       | [35–40)                   | 57.80 (52.36, 63.24)      | AB               |                      |
|                                       | [40–46]                   | 62.06 (55.64, 68.48)      | A                |                      |
| Day of the week                       | Friday                    | 54.47 (48.89, 60.05)      |                  | 0.2245               |
|                                       | Saturday                  | 55.61 (50.53, 60.68)      |                  |                      |
|                                       | Sunday                    | 61.84 (55.74, 67.95)      |                  |                      |
|                                       | Monday                    | 58.92 (53.29, 64.56)      |                  |                      |
|                                       | Tuesday                   | 58.76 (53.05, 64.47)      |                  |                      |
|                                       | Wednesday                 | 58.21 (52.84, 63.58)      |                  |                      |
|                                       | Thursday                  | 57.68 (51.18, 64.17)      |                  |                      |
| Province                              | PEI                       | 59.57 (53.81, 65.32)      |                  | 0.0968               |
|                                       | ON                        | 56.29 (51.25, 61.33)      |                  |                      |
| Background nighttime sound level (dB) | <40                       | 51.10 (45.38, 56.83)      | A                | 0.0071               |
|                                       | 40–<50                    | 54.79 (49.72, 59.86)      | AB               |                      |
|                                       | 50–<55                    | 58.52 (53.19, 63.86)      | B                |                      |
|                                       | >55–61                    | 67.29 (57.17, 77.41)      | B                |                      |
| Employment                            | Yes                       | 55.38 (50.15, 60.62)      | A                | 0.0143               |
|                                       | No                        | 60.47 (55.21, 65.74)      | B                |                      |
| Level of Education                    | ≤High School              | 60.83 (55.70, 65.96)      | A                | 0.0409               |
|                                       | Trade/Certificate/College | 56.73 (51.42, 62.04)      | B                |                      |
|                                       | University                | 56.22 (49.94, 62.50)      | AB               |                      |
| Bedroom location                      | Basement                  | 68.20 (56.32, 80.08)      | A                | 0.0471               |
|                                       | First floor               | 53.80 (50.07, 57.53)      | AB               |                      |
|                                       | Second floor or higher    | 51.78 (47.59, 55.98)      | B                |                      |
| Audible aircraft                      | Yes                       | 56.10 (50.84, 61.37)      | A                | 0.0464               |
|                                       | No                        | 59.75 (54.51, 65.00)      | B                |                      |
| Smoking status                        | Current                   | 54.85 (49.02, 60.67)      | A                | 0.0086               |
|                                       | Former                    | 60.81 (55.43, 66.19)      | B                |                      |
|                                       | Never                     | 58.13 (52.75, 63.50)      | AB               |                      |
| Sleep medication                      | Yes                       | 54.80 (48.58, 61.03)      | A                | 0.0214               |
|                                       | No                        | 61.05 (56.09, 66.01)      | B                |                      |

n=647, sleep nights=3728, QIC=3812

<sup>a</sup> LSM - Least squares means of wake after sleep onset for each group after adjusting for all other variables in the multiple GEE regression model and corresponding 95% confidence interval (CI).

<sup>b</sup> p-values and pairwise tests (PWT) based on the transformed WASO variable ( $\sqrt{x}$ ) in order to satisfy model assumptions of normality and constant variance. Groups within a variable with the same letter are statistically similar whereas groups with different letters are statistically different.

<sup>c</sup> the interaction between WTN group and Day of the week was included in the model and was not statistically significant  $p=0.5071$ .

## Supplementary Table VIII: Multiple generalized estimating equations (GEE) regression models for the rate of awakening bouts to total time in bed (rate is per 60 minutes in bed)

Repeated-measures data from all wrist actigraphy measurements were modeled using the generalized estimating equations (GEE) method. Multiple GEE regression models for each actigraphy endpoint were developed using the stepwise method with a 20% significance entry criterion and a 10% significance criterion to remain in the model. An unstructured variance-covariance structure between sleep nights was applied to all endpoints with the exception of sleep latency, where compound symmetry was used. The wrist actigraphy endpoint of rate of awakening bouts does not follow a normal distribution, because it is a count (awakening bouts). Therefore, to analyze awakening bouts a Poisson distribution was assumed. The number of awakening bouts was analyzed with respect to the total time spent in bed and is reported as a rate of the number of awakening bouts per 60 min in bed. In the GEE models, statistical tests were based on transformed data in order to satisfy the normality and constant variance assumptions. Because back-transformation was not possible for some endpoints, the arithmetic mean (least squares mean [LSM]) is presented for all endpoints. All regression models for actigraphy endpoints were adjusted for provincial differences. Province was treated as a confounder in the model with associated adjustments, as required. Day of the week was forced in the model.

| Variable                        | Group                      | LSM (95% CI) <sup>a</sup> | PWT <sup>b</sup> | LSR (95% CI) <sup>c</sup> | p-value <sup>b</sup> |
|---------------------------------|----------------------------|---------------------------|------------------|---------------------------|----------------------|
| WTN levels (dB) <sup>c</sup>    | <25                        | 23.19 (20.58, 25.79)      |                  | 2.55 (2.21, 2.94)         | 0.3726               |
|                                 | [25–30)                    | 20.57 (17.87, 23.26)      |                  | 2.45 (2.07, 2.89)         |                      |
|                                 | [30–35)                    | 24.00 (21.26, 26.75)      |                  | 2.73 (2.37, 3.13)         |                      |
|                                 | [35–40)                    | 22.56 (20.57, 24.56)      |                  | 2.68 (2.40, 2.99)         |                      |
|                                 | [40–46]                    | 22.85 (20.68, 25.02)      |                  | 2.46 (2.13, 2.83)         |                      |
| Day of the week                 | Friday                     | 22.04 (19.93, 24.15)      |                  | 2.61 (2.33, 2.92)         | 0.8312               |
|                                 | Saturday                   | 22.70 (20.55, 24.85)      |                  | 2.55 (2.28, 2.86)         |                      |
|                                 | Sunday                     | 23.41 (21.34, 25.49)      |                  | 2.61 (2.33, 2.92)         |                      |
|                                 | Monday                     | 22.94 (20.71, 25.16)      |                  | 2.56 (2.28, 2.87)         |                      |
|                                 | Tuesday                    | 22.76 (20.53, 24.99)      |                  | 2.55 (2.27, 2.87)         |                      |
|                                 | Wednesday                  | 22.32 (20.17, 24.47)      |                  | 2.51 (2.24, 2.81)         |                      |
|                                 | Thursday                   | 22.26 (20.13, 24.40)      |                  | 2.59 (2.31, 2.90)         |                      |
| Province                        | PEI                        | 22.14 (19.87, 24.41)      |                  | 2.57 (2.26, 2.93)         | 0.9565               |
|                                 | ON                         | 23.13 (21.13, 25.13)      |                  | 2.57 (2.30, 2.86)         |                      |
| Marital Status                  | Married/Common-law         | 22.63 (20.48, 24.77)      | A                | 2.44 (2.18, 2.74)         | 0.0541               |
|                                 | Widowed/Separated/Divorced | 21.48 (19.15, 23.81)      | AB               | 2.45 (2.14, 2.81)         |                      |
|                                 | Single, never been married | 23.79 (21.34, 26.25)      | B                | 2.83 (2.47, 3.24)         |                      |
| Caffeine consumption (cups/day) | None                       | 21.46 (19.02, 23.89)      |                  | 2.35 (2.02, 2.74)         | 0.0742               |
|                                 | 1 or 2                     | 23.42 (21.38, 25.47)      |                  | 2.67 (2.39, 2.98)         |                      |
|                                 | 3 or 4                     | 23.61 (21.06, 26.16)      |                  | 2.79 (2.45, 3.18)         |                      |
|                                 | 5 or more                  | 22.05 (19.75, 24.34)      |                  | 2.49 (2.18, 2.86)         |                      |
| Sleep disturbed by pain         | Yes                        | 22.68 (19.89, 25.46)      | A                | 2.76 (2.39, 3.18)         | 0.0242               |
|                                 | No                         | 22.59 (21.00, 24.18)      | B                | 2.39 (2.16, 2.64)         |                      |
| Annoyance with blinking lights  | High                       | 22.85 (19.46, 26.24)      | A                | 2.85 (2.41, 3.37)         | 0.0157               |
|                                 | Low                        | 22.42 (21.25, 23.59)      | B                | 2.31 (2.12, 2.52)         |                      |
| Restless leg syndrome           | Yes                        | 21.95 (19.72, 24.18)      | A                | 2.41 (2.09, 2.77)         | 0.0373               |
|                                 | No                         | 23.32 (21.14, 25.50)      | B                | 2.74 (2.47, 3.05)         |                      |

n=626, sleep nights=3595, QIC=-87635

<sup>a</sup> LSM - Least squares means of awakening bouts for each group after adjusting for all other variables in the multiple GEE regression model and corresponding 95% confidence interval (CI).

<sup>b</sup> p-values and pairwise tests (PWT) based on the rate of awakening bouts to total time in bed. Groups within a variable with the same letter are statistically similar whereas groups with different letters are statistically different.

<sup>c</sup> LSR Least square means of ratios of each group after adjusting for all other variables in the multiple GEE regression model and corresponding 95% confidence interval (CI). The ratio is the rate of number of awakening bouts per 60 minutes time spent in bed.

<sup>d</sup> the interaction between WTN group and Day of the week was included in the model and was not statistically significant  $p=0.8478$ .
